# Supplementary material for: Loss of Tsc1 in cerebellar Purkinje cells induces transcriptional and translation changes in FMRP target transcripts
Source: eLife. 2021 Jul 14;10:e67399. doi: 10.7554/eLife.67399 (PMC8279760; doi:10.7554/eLife.67399)
Supplement: Supplementary file 1. [file elife-67399-supp1.csv]

Cuff.Gene	Mean.Exp	FC	p.value	FDR	transcript_id	exon_number	gene_name	oId	nearest_ref	class_code	tss_id
XLOC_048920	6.486578294	-4.753668307	0.009310757	0.592152203	TCONS_00150903	1	Kcna5	CUFF.61310.1	ENSMUST00000060972	=	TSS89913;
XLOC_016194	6.702203807	-4.538679991	0.006036068	0.592152203	TCONS_00049242	1	Cplx2	CUFF.18731.1	ENSMUST00000026985	x	TSS29542;
XLOC_010015	7.956600694	-3.349982317	0.003194073	0.592152203	TCONS_00032144	1	Doc2b	CUFF.11820.2	ENSMUST00000021209	=	TSS18944;
XLOC_050108	6.289198135	-3.236950643	0.001314003	0.5748551	TCONS_00153635	1	Gm19345	ENSMUST00000172815	ENSMUST00000172815	=	TSS91698;
XLOC_027494	11.62174811	-3.23103139	0.009935322	0.592152203	TCONS_00082192	1	Camk2a	ENSMUST00000102888	ENSMUST00000102888	=	TSS49479;
XLOC_047129	15.31699996	-3.21103316	0.00332272	0.592152203	TCONS_00144729	1	Itpr1	ENSMUST00000032192	ENSMUST00000032192	=	TSS86405;
XLOC_031935	7.37240767	-3.194406366	0.004084655	0.592152203	TCONS_00096496	1	Slc32a1	ENSMUST00000045738	ENSMUST00000045738	=	TSS57962;
XLOC_047233	8.185182497	-3.114848438	0.00675483	0.592152203	TCONS_00145212	1	8430408G22Rik	ENSMUST00000067354	ENSMUST00000067354	=	TSS86680;
XLOC_042397	7.10768937	-3.08442804	0.006315951	0.592152203	TCONS_00128996	1	Slc5a1	ENSMUST00000011178	ENSMUST00000011178	=	TSS77259;
XLOC_056154	8.426195522	-3.048541689	0.001665103	0.592152203	TCONS_00173383	1	Bean1	ENSMUST00000164076	ENSMUST00000164076	=	TSS103145;
XLOC_051840	7.435437345	-3.029631904	0.000343061	0.365989308	TCONS_00159874	1	Gm16201	ENSMUST00000134312	ENSMUST00000134312	=	TSS95287;
XLOC_051880	10.38772502	-2.992858783	0.00848755	0.592152203	TCONS_00160074	1	Pkp3	ENSMUST00000106039	ENSMUST00000106039	=	TSS95377;
XLOC_005051	10.70604818	-2.969355204	0.004197494	0.592152203	TCONS_00015566	1	Slc1a6	ENSMUST00000005490	ENSMUST00000005490	=	TSS9196;
XLOC_002492	8.211290849	-2.94335733	0.002972421	0.592152203	TCONS_00008082	1	4-Mar	ENSMUST00000047786	ENSMUST00000047786	=	TSS4709;
XLOC_026469	8.398822996	-2.93668809	0.009721789	0.592152203	TCONS_00080092	1	Gm10190	ENSMUST00000086549	ENSMUST00000086549	=	TSS48003;
XLOC_048781	5.927032132	-2.882180359	0.001298198	0.5748551	TCONS_00150234	1	Rassf4	CUFF.60878.1	ENSMUST00000035842	o	TSS89568;
XLOC_011997	9.761963371	-2.654048813	0.007799551	0.592152203	TCONS_00038041	1	Plekhd1	CUFF.16018.1	ENSMUST00000140770	j	TSS22535;
XLOC_047169	11.29472122	-2.648080342	0.0075187	0.592152203	TCONS_00144864	1	Cpne9	CUFF.60632.1	ENSMUST00000041203	j	TSS86492;
XLOC_059334	5.401273674	-2.631752201	0.001126387	0.556181004	TCONS_00183769	1	Gm42433	ENSMUST00000196806	ENSMUST00000196806	=	TSS109198;
XLOC_033512	8.486471384	-2.621284912	0.005505065	0.592152203	TCONS_00102830	1	Hdc	CUFF.42430.3	ENSMUST00000124396	=	TSS61446;
XLOC_004540	10.37444122	-2.619161238	0.009042623	0.592152203	TCONS_00013804	1	Ctgf	CUFF.5883.1	ENSMUST00000020171	j	TSS8180;
XLOC_030965	11.05481125	-2.542974209	0.005529094	0.592152203	TCONS_00092731	1	Gad1	ENSMUST00000130618	ENSMUST00000130618	=	TSS55813;
XLOC_005860	6.461882103	-2.541515995	0.002238696	0.592152203	TCONS_00018313	1	Arfgef3	CUFF.5729.1	ENSMUST00000215836	o	TSS10838;
XLOC_043680	10.63702759	-2.540840284	0.006205424	0.592152203	TCONS_00133630	1	Grid2ip	ENSMUST00000110733	ENSMUST00000110733	=	TSS79981;
XLOC_041415	11.87924967	-2.483190056	0.008918504	0.592152203	TCONS_00126857	1	Kcnab2	CUFF.52450.2	ENSMUST00000159186	j	TSS75791;
XLOC_055771	13.10675382	-2.46284776	0.002980761	0.592152203	TCONS_00171882	1	Homer3	ENSMUST00000087467	ENSMUST00000087467	=	TSS102299;
XLOC_050670	13.52583663	-2.393306761	0.006969877	0.592152203	TCONS_00155310	1	Shank1	CUFF.63452.4	ENSMUST00000107938	j	TSS92682;
XLOC_006255	5.181656536	-2.359343683	0.001858643	0.592152203	TCONS_00019415	1	D830039M14Rik	ENSMUST00000217740	ENSMUST00000217740	=	TSS11493;
XLOC_039658	8.574323231	-2.34867693	0.000527514	0.417314356	TCONS_00120759	1	Kif17	CUFF.51905.4	ENSMUST00000105818	j	TSS72289;
XLOC_006660	6.208195364	-2.331334952	0.006409719	0.592152203	TCONS_00021136	1	Cfap54	CUFF.8141.3	ENSMUST00000212902	j	TSS12435;
XLOC_008369	12.44827216	-2.286972987	0.007364355	0.592152203	TCONS_00025771	1	Atp2a3	ENSMUST00000163326	ENSMUST00000163326	=	TSS15327;
XLOC_056165	10.75959806	-2.193085682	0.007486575	0.592152203	TCONS_00173426	1	Car7	ENSMUST00000212942	ENSMUST00000212942	=	TSS103168;
XLOC_041413	7.945230225	-2.162347905	0.007330835	0.592152203	TCONS_00126826	1	Espn	CUFF.52446.9	ENSMUST00000136627	=	TSS75782;
XLOC_039560	9.178773931	-2.099659333	0.003540679	0.592152203	TCONS_00120317	1	Tmem200b	ENSMUST00000094666	ENSMUST00000094666	=	TSS72047;
XLOC_036504	6.806555914	-2.07391651	0.002562081	0.592152203	TCONS_00111390	1	Tmem212	CUFF.44751.1	ENSMUST00000058077	j	TSS66606;
XLOC_051833	14.81246281	-2.05950119	0.00904425	0.592152203	TCONS_00159851	1	Inpp5a	ENSMUST00000106098	ENSMUST00000106098	=	TSS95268;
XLOC_029365	11.0251425	-2.042545564	0.007723722	0.592152203	TCONS_00087877	1	Dagla	CUFF.36429.4	ENSMUST00000039327	j	TSS52887;
XLOC_050344	6.449954375	-2.037348901	0.009555098	0.592152203	TCONS_00154405	1	Map4k1	ENSMUST00000208227	ENSMUST00000208227	=	TSS92163;
XLOC_033201	15.17356318	-2.000707544	0.007795997	0.592152203	TCONS_00101559	1	Dgkz	CUFF.41244.4	ENSMUST00000111303	j	TSS60749;
XLOC_031548	7.893441971	-1.997807989	0.008834296	0.592152203	TCONS_00094937	1	Fgf7	ENSMUST00000138576	ENSMUST00000138576	=	TSS57105;
XLOC_009939	11.13804354	-1.977249818	0.003875936	0.592152203	TCONS_00031873	1	Pitpnm3	CUFF.11610.2	ENSMUST00000075258	j	TSS18786;
XLOC_025954	12.47180933	-1.971575148	0.003244821	0.592152203	TCONS_00078107	1	Wiz	CUFF.31435.3	ENSMUST00000170617	j	TSS46930;
XLOC_008870	8.639266844	-1.938506952	0.008773211	0.592152203	TCONS_00027750	1	Arl4d	ENSMUST00000039388	ENSMUST00000039388	=	TSS16475;
XLOC_012299	6.724417807	-1.937833391	0.007418731	0.592152203	TCONS_00039051	1	Ak7	CUFF.17016.2	ENSMUST00000040876	j	TSS23130;
XLOC_029684	6.040882671	-1.933546969	0.008470539	0.592152203	TCONS_00089041	1	Lbx1	ENSMUST00000099401	ENSMUST00000099401	=	TSS53546;
XLOC_058704	10.7266094	-1.92991947	0.002841134	0.592152203	TCONS_00181149	1	6030419C18Rik	CUFF.72731.1	ENSMUST00000217624	=	TSS107762;
XLOC_037447	9.156451328	-1.885157589	0.006737003	0.592152203	TCONS_00114301	1	Slc6a17	CUFF.46975.2	ENSMUST00000168211	j	TSS68313;
XLOC_041156	9.144396133	-1.860197409	0.00046065	0.411569057	TCONS_00125844	1	Extl1	ENSMUST00000030643	ENSMUST00000030643	=	TSS75212;
XLOC_059708	8.114997219	-1.855454984	0.000588093	0.417314356	TCONS_00185310	1	Epor	CUFF.71267.2	ENSMUST00000006397	j	TSS110015;
XLOC_045215	9.119281024	-1.844126515	0.005373732	0.592152203	TCONS_00139406	1	Orai2	CUFF.56789.2	ENSMUST00000196454	j	TSS83169;
XLOC_011461	11.59864306	-1.834392808	0.007761992	0.592152203	TCONS_00036464	1	Hpcal1	ENSMUST00000071858	ENSMUST00000071858	=	TSS21546;
XLOC_022801	6.806808183	-1.828976633	0.001563144	0.590682691	TCONS_00067702	1	Efcab1	ENSMUST00000090277	ENSMUST00000090277	=	TSS40842;
XLOC_050683	13.33493363	-1.79915308	0.005793335	0.592152203	TCONS_00155389	1	Kcnc3	ENSMUST00000209177	ENSMUST00000209177	=	TSS92715;
XLOC_047081	9.96263821	-1.797623391	0.003440698	0.592152203	TCONS_00144609	1	Gpr27	ENSMUST00000101122	ENSMUST00000101122	=	TSS86331;
XLOC_036167	7.592664519	-1.792285475	0.002292474	0.592152203	TCONS_00110348	1	Ddit4l	ENSMUST00000167564	ENSMUST00000167564	=	TSS66013;
XLOC_000653	8.526340193	-1.78944482	0.009560774	0.592152203	TCONS_00002143	1	Des	ENSMUST00000027409	ENSMUST00000027409	=	TSS1233;
XLOC_008833	6.332605661	-1.777140356	0.002002102	0.592152203	TCONS_00027578	1	Dhx58os	ENSMUST00000137154	ENSMUST00000137154	=	TSS16382;
XLOC_021021	14.62813736	-1.76952691	0.001938129	0.592152203	TCONS_00062636	1	Csdc2	ENSMUST00000038757	ENSMUST00000038757	=	TSS37733;
XLOC_029225	6.825206466	-1.760409288	0.002326203	0.592152203	TCONS_00087270	1		CUFF.36009.1		u	TSS52577;
XLOC_028673	11.09343049	-1.75331458	0.005336462	0.592152203	TCONS_00085153	1	Gal3st3	CUFF.36112.1	ENSMUST00000061169	j	TSS51370;
XLOC_043007	5.341221291	-1.723808473	0.007181441	0.592152203	TCONS_00130955	1	1700007G11Rik	CUFF.55146.3	ENSMUST00000197812	=	TSS78473;
XLOC_028648	14.20366386	-1.713752738	0.003792636	0.592152203	TCONS_00085038	1	Pitpnm1	CUFF.36016.4	ENSMUST00000049658	j	TSS51319;
XLOC_055386	10.70380784	-1.700202659	0.007602013	0.592152203	TCONS_00170650	1		CUFF.67474.1		u	TSS101587;
XLOC_049758	13.49341916	-1.693680253	0.008637697	0.592152203	TCONS_00152510	1	Myadm	ENSMUST00000203328	ENSMUST00000203328	=	TSS91022;
XLOC_006272	6.315918391	-1.66236499	0.004433327	0.592152203	TCONS_00019551	1	Stox1	CUFF.6877.3	ENSMUST00000133371	j	TSS11556;
XLOC_007936	11.09256126	-1.648449413	0.003524725	0.592152203	TCONS_00023928	1	Ebf1	CUFF.10425.1	ENSMUST00000081265	j	TSS14341;
XLOC_046178	11.2497653	-1.642875718	0.002449388	0.592152203	TCONS_00141650	1	Strip2	ENSMUST00000151738	ENSMUST00000151738	=	TSS84655;
XLOC_023540	11.59895703	-1.641693402	0.006650351	0.592152203	TCONS_00070741	1	Camk2n2	ENSMUST00000052939	ENSMUST00000052939	=	TSS42476;
XLOC_002618	13.14075016	-1.638969134	0.007789755	0.592152203	TCONS_00008583	1	Dner	CUFF.1989.7	ENSMUST00000049126	j	TSS4976;
XLOC_053619	10.42248393	-1.615478397	0.004212368	0.592152203	TCONS_00165651	1	Tlnrd1	ENSMUST00000094216	ENSMUST00000094216	=	TSS98572;
XLOC_013036	5.738382109	-1.612107899	0.008899158	0.592152203	TCONS_00041139	1	AC159621.2	ENSMUST00000223519	ENSMUST00000223519	=	TSS24409;
XLOC_037655	7.313156549	-1.591340242	0.00121601	0.569800122	TCONS_00115058	1	Fam241a	ENSMUST00000199273	ENSMUST00000199273	=	TSS68739;
XLOC_052907	8.175269672	-1.591214904	0.0011879	0.568584435	TCONS_00163542	1	Iglon5	CUFF.63421.1	ENSMUST00000107974	j	TSS97307;
XLOC_049804	11.65071241	-1.584412812	0.008158572	0.592152203	TCONS_00152777	1	Epn1	ENSMUST00000098845	ENSMUST00000098845	=	TSS91160;
XLOC_029189	7.648135895	-1.546370827	0.007249226	0.592152203	TCONS_00087144	1	Hspa12a	CUFF.38184.1	ENSMUST00000066285	x	TSS52503;
XLOC_050743	13.58408629	-1.534254302	0.00550814	0.592152203	TCONS_00155807	1	Nomo1	CUFF.63682.2	ENSMUST00000033121	j	TSS92911;
XLOC_026255	9.866780656	-1.533229914	0.005796557	0.592152203	TCONS_00079404	1	Foxp4	CUFF.32179.9	ENSMUST00000113265	j	TSS47587;
XLOC_059858	6.171630679	-1.521201544	0.009367803	0.592152203	TCONS_00185808	1	Nrgn	ENSMUST00000065668	ENSMUST00000065668	=	TSS110294;
XLOC_009405	10.94882564	-1.508444153	0.001783731	0.592152203	TCONS_00029886	1	Ccdc85a	CUFF.9999.4	ENSMUST00000146385	j	TSS17659;
XLOC_039515	12.16375796	-1.473776518	0.008451993	0.592152203	TCONS_00120068	1	Rnf19b	ENSMUST00000168461	ENSMUST00000168461	=	TSS71917;
XLOC_019761	11.47840559	-1.473136822	0.008777837	0.592152203	TCONS_00059601	1	Dgkh	CUFF.23185.8	ENSMUST00000228362	=	TSS35730;
XLOC_018435	11.85044432	-1.467462485	0.004509035	0.592152203	TCONS_00055406	1	Hr	ENSMUST00000159959	ENSMUST00000159959	=	TSS33271;
XLOC_023501	13.24693348	-1.433755212	0.001048383	0.525268216	TCONS_00070626	1	Gp1bb	ENSMUST00000167388	ENSMUST00000167388	=	TSS42395;
XLOC_017694	9.845981155	-1.43344015	0.001396728	0.576272846	TCONS_00053300	1	Galnt15	ENSMUST00000022460	ENSMUST00000022460	=	TSS31992;
XLOC_049134	7.362026727	-1.427488931	0.002826218	0.592152203	TCONS_00151506	1	Rerg	CUFF.61610.2	ENSMUST00000203003	=	TSS90251;
XLOC_007711	7.582247603	-1.425761968	0.004378905	0.592152203	TCONS_00023321	1	Ikzf1	ENSMUST00000141436	ENSMUST00000141436	=	TSS13948;
XLOC_029809	6.500908025	-1.424813848	0.000724899	0.456001458	TCONS_00089524	1		CUFF.36008.1		u	TSS53801;
XLOC_024937	8.898079962	-1.419222661	0.002033813	0.592152203	TCONS_00074169	1	Hmga1	CUFF.31175.3	ENSMUST00000119486	=	TSS44709;
XLOC_010277	5.756581013	-1.411450449	0.009253082	0.592152203	TCONS_00033130	1	Zfp652os	ENSMUST00000155531	ENSMUST00000155531	=	TSS19511;
XLOC_060304	9.455986211	-1.396623115	0.006103188	0.592152203	TCONS_00187579	1	Fam81a	CUFF.73371.1	ENSMUST00000034749	j	TSS111282;
XLOC_043550	10.62839325	-1.395725385	0.008390027	0.592152203	TCONS_00133126	1	Gm16599	CUFF.56791.1	ENSMUST00000148082	o	TSS79703;
XLOC_021712	12.79715172	-1.387478249	0.006923066	0.592152203	TCONS_00064964	1	Lynx1	CUFF.25616.1	ENSMUST00000023259	j	TSS39113;
XLOC_043235	8.266083856	-1.384475104	0.008313963	0.592152203	TCONS_00131754	1	Fam222a	ENSMUST00000043650	ENSMUST00000043650	=	TSS78929;
XLOC_048746	14.42799756	-1.370509813	0.001740328	0.592152203	TCONS_00150069	1	Atp2b2	CUFF.60708.3	ENSMUST00000205052	=	TSS89477;
XLOC_058909	12.98381562	-1.359150998	0.003824374	0.592152203	TCONS_00181971	1	Myo5a	ENSMUST00000149823	ENSMUST00000149823	=	TSS108207;
XLOC_061717	14.47010306	-1.354711269	0.003547815	0.592152203	TCONS_00191185	1	Pcsk1n	ENSMUST00000041096	ENSMUST00000041096	=	TSS113525;
XLOC_043990	8.088148331	-1.343122806	0.008022666	0.592152203	TCONS_00134693	1	Kcnh2	ENSMUST00000115098	ENSMUST00000115098	=	TSS80598;
XLOC_042378	7.995637787	-1.329157298	0.00127892	0.5748551	TCONS_00128911	1	Fosl2	ENSMUST00000031017	ENSMUST00000031017	=	TSS77215;
XLOC_006236	10.98277446	-1.327547374	0.002201475	0.592152203	TCONS_00019326	1	Ddit4	ENSMUST00000020308	ENSMUST00000020308	=	TSS11447;
XLOC_000301	8.679244561	-1.32734913	0.005950434	0.592152203	TCONS_00000911	1	Il1r1	ENSMUST00000027241	ENSMUST00000027241	=	TSS535;
XLOC_001434	9.290347053	-1.326067322	0.001244504	0.571488861	TCONS_00004711	1	Ankrd45	CUFF.3839.1	ENSMUST00000111608	j	TSS2723;
XLOC_042281	13.97343642	-1.319795973	0.006685473	0.592152203	TCONS_00128422	1	Agap3	CUFF.53226.1	ENSMUST00000024123	j	TSS76956;
XLOC_048884	6.728196715	-1.318273106	0.001754866	0.592152203	TCONS_00150701	1	C1s1	ENSMUST00000160505	ENSMUST00000160505	=	TSS89801;
XLOC_042342	6.346217242	-1.317577596	0.007873677	0.592152203	TCONS_00128629	1	1700001C02Rik	ENSMUST00000127815	ENSMUST00000127815	=	TSS77092;
XLOC_023367	9.594972468	-1.315502354	0.008886965	0.592152203	TCONS_00070071	1	Srl	CUFF.27334.4	ENSMUST00000023161	j	TSS42098;
XLOC_061289	5.53915738	-1.297818927	0.007504436	0.592152203	TCONS_00190586	1		CUFF.73131.1		u	TSS113023;
XLOC_035370	7.254363969	-1.280669923	0.004745572	0.592152203	TCONS_00107553	1	Mlf1	ENSMUST00000077916	ENSMUST00000077916	=	TSS64413;
XLOC_059262	9.358655743	-1.261386082	0.006524568	0.592152203	TCONS_00183185	1	Cacna2d2	CUFF.74622.3	ENSMUST00000168532	j	TSS108919;
XLOC_043126	7.559960318	-1.259500049	0.007730514	0.592152203	TCONS_00131358	1	Gm10419	CUFF.55456.1	ENSMUST00000100944	j	TSS78700;
XLOC_058211	12.3257834	-1.245828395	0.00645939	0.592152203	TCONS_00179417	1	Plppr2	CUFF.71264.1	ENSMUST00000046371	j	TSS106701;
XLOC_056287	8.907840517	-1.245115298	0.005665333	0.592152203	TCONS_00174014	1	Bcar1	CUFF.70233.1	ENSMUST00000212147	x	TSS103456;
XLOC_025185	13.78841746	-1.239624368	0.004441251	0.592152203	TCONS_00075314	1	Gabbr1	CUFF.31832.2	ENSMUST00000025338	j	TSS45334;
XLOC_061832	15.51614427	-1.239619833	0.009784856	0.592152203	TCONS_00191428	1	Cdk16	ENSMUST00000115364	ENSMUST00000115364	=	TSS113691;
XLOC_025546	12.4909821	-1.236766517	0.007780925	0.592152203	TCONS_00076617	1	Epas1	CUFF.33323.1	ENSMUST00000024954	j	TSS46089;
XLOC_018425	5.719038757	-1.233358559	0.008659396	0.592152203	TCONS_00055377	1	AC151836.1	ENSMUST00000181856	ENSMUST00000228730	=	TSS33253;
XLOC_026253	6.780124272	-1.230402956	0.00845329	0.592152203	TCONS_00079388	1	Mdfi	ENSMUST00000113280	ENSMUST00000113280	=	TSS47584;
XLOC_034137	11.73050804	-1.206955564	0.009638034	0.592152203	TCONS_00105213	1	Zbtb46	CUFF.44273.1	ENSMUST00000029106	j	TSS62739;
XLOC_013422	12.88833234	-1.186217346	0.006603745	0.592152203	TCONS_00042335	1	Ttc7b	ENSMUST00000062957	ENSMUST00000062957	=	TSS25133;
XLOC_008779	13.29523759	-1.182349576	0.003248784	0.592152203	TCONS_00027379	1	Ppp1r1b	ENSMUST00000078694	ENSMUST00000078694	=	TSS16255;
XLOC_010788	9.878944912	-1.181063532	0.005932254	0.592152203	TCONS_00035399	1	Wdr45b	CUFF.14126.1	ENSMUST00000026173	o	TSS20718;
XLOC_005139	14.2340346	-1.170966157	0.008715568	0.592152203	TCONS_00016037	1	Pip5k1c	ENSMUST00000163075	ENSMUST00000163075	=	TSS9449;
XLOC_021528	9.888697597	-1.162903706	0.009533935	0.592152203	TCONS_00064338	1	Gm26704	CUFF.24898.1	ENSMUST00000181362	o	TSS38766;
XLOC_021933	14.31153761	-1.159335031	0.007276471	0.592152203	TCONS_00065842	1	Cerk	CUFF.26468.1	ENSMUST00000156546	=	TSS39590;
XLOC_012225	16.52261935	-1.139169352	0.008099189	0.592152203	TCONS_00038807	1	Calm1	CUFF.16833.1	ENSMUST00000110082	j	TSS22982;
XLOC_021054	7.838201212	-1.133073465	0.008472591	0.592152203	TCONS_00062777	1	Parvg	ENSMUST00000127551	ENSMUST00000127551	=	TSS37821;
XLOC_060904	9.519319231	-1.131047014	0.006916091	0.592152203	TCONS_00189980	1	Csrnp1	CUFF.75151.2	ENSMUST00000214058	=	TSS112564;
XLOC_039664	11.38816543	-1.121956089	0.002730602	0.592152203	TCONS_00120786	1	Camk2n1	CUFF.51913.2	ENSMUST00000050918	j	TSS72299;
XLOC_027887	9.566256164	-1.11813341	0.004171834	0.592152203	TCONS_00083653	1	Gm15337	CUFF.34606.1	ENSMUST00000135378	o	TSS50299;
XLOC_031811	5.098521379	-1.105047177	0.008863589	0.592152203	TCONS_00095902	1	Csnk2a1	CUFF.43371.1	ENSMUST00000099224	o	TSS57668;
XLOC_012558	13.14693214	-1.093659422	0.007374171	0.592152203	TCONS_00040006	1	Slc7a15	CUFF.14387.1	ENSMUST00000036938	o	TSS23687;
XLOC_005142	11.29729785	-1.083776988	0.003049892	0.592152203	TCONS_00016060	1	Mfsd12	ENSMUST00000044844	ENSMUST00000044844	=	TSS9461;
XLOC_004868	9.133178845	-1.078387375	0.007681847	0.592152203	TCONS_00014792	1	Lrrc20	CUFF.6840.1	ENSMUST00000049242	j	TSS8785;
XLOC_021697	12.02533134	-1.069528956	0.002162194	0.592152203	TCONS_00064912	1	Slc45a4	CUFF.25587.2	ENSMUST00000151288	j	TSS39083;
XLOC_009871	10.53593504	-1.056688719	0.002283417	0.592152203	TCONS_00031579	1	Fgf11	ENSMUST00000011285	ENSMUST00000011285	=	TSS18647;
XLOC_039882	11.12215617	-1.046771387	0.008768694	0.592152203	TCONS_00121372	1	Errfi1	ENSMUST00000073600	ENSMUST00000073600	=	TSS72665;
XLOC_031107	9.571150613	-1.046579211	0.006474999	0.592152203	TCONS_00093181	1	Ube2l6	ENSMUST00000102642	ENSMUST00000102642	=	TSS56092;
XLOC_026340	13.72082633	-1.04030097	0.006518387	0.592152203	TCONS_00079695	1	Slc25a23	ENSMUST00000040280	ENSMUST00000040280	=	TSS47758;
XLOC_000267	10.72339675	-1.017651653	0.003341841	0.592152203	TCONS_00000751	1	Inpp4a	ENSMUST00000146676	ENSMUST00000146676	=	TSS454;
XLOC_045183	7.095556851	-1.005586585	0.008438108	0.592152203	TCONS_00139284	1	Abhd11os	ENSMUST00000136022	ENSMUST00000136022	=	TSS83106;
XLOC_002549	10.56446881	1.005949049	0.005345522	0.592152203	TCONS_00008384	1	Epha4	CUFF.1844.1	ENSMUST00000027451	j	TSS4861;
XLOC_035093	12.40035002	1.012740006	0.005647182	0.592152203	TCONS_00106687	1	Sox2	ENSMUST00000099151	ENSMUST00000099151	=	TSS63906;
XLOC_056379	6.096078582	1.015906328	0.009355693	0.592152203	TCONS_00174353	1	Gm21399	ENSMUST00000180210	ENSMUST00000180210	=	TSS103642;
XLOC_047042	8.946113748	1.017974215	0.005282836	0.592152203	TCONS_00144514	1	Gm17797	CUFF.60111.1	ENSMUST00000182175	o	TSS86270;
XLOC_044074	9.79034336	1.024020903	0.007728074	0.592152203	TCONS_00135019	1	Slc5a6	ENSMUST00000202520	ENSMUST00000202520	=	TSS80776;
XLOC_047213	10.35406617	1.048514461	0.006634987	0.592152203	TCONS_00145094	1	Cand2	ENSMUST00000075995	ENSMUST00000075995	=	TSS86614;
XLOC_018310	9.616944768	1.062716679	0.007643928	0.592152203	TCONS_00055023	1	AC124555.1	CUFF.22577.1	ENSMUST00000227051	o	TSS33049;
XLOC_026680	5.185676484	1.063049395	0.002598057	0.592152203	TCONS_00080485	1		CUFF.30720.1		u	TSS48283;
XLOC_015129	6.466550912	1.077620554	0.007123015	0.592152203	TCONS_00046104	1	Gm10767	ENSMUST00000168767	ENSMUST00000168767	=	TSS27686;
XLOC_032081	10.57128735	1.119603661	0.009620448	0.592152203	TCONS_00097053	1	Dok5	CUFF.43991.1	ENSMUST00000029075	j	TSS58264;
XLOC_044016	9.250275885	1.156100354	0.008205356	0.592152203	TCONS_00134824	1	Xrcc2	CUFF.53284.1	ENSMUST00000030773	o	TSS80673;
XLOC_016419	8.004385038	1.156122615	0.009647973	0.592152203	TCONS_00050093	1	Zfp708	ENSMUST00000109742	ENSMUST00000109742	=	TSS29998;
XLOC_054673	9.091737622	1.195440709	0.005177849	0.592152203	TCONS_00169420	1		CUFF.63041.1		u	TSS100666;
XLOC_042346	7.468012664	1.195691923	0.006741292	0.592152203	TCONS_00128651	1	Cenpa	CUFF.53424.3	ENSMUST00000149759	=	TSS77099;
XLOC_059938	8.372255905	1.205874696	0.008418889	0.592152203	TCONS_00186004	1	CT025619.1	ENSMUST00000214294	ENSMUST00000214294	=	TSS110436;
XLOC_007916	5.367528995	1.212652133	0.000808889	0.480392867	TCONS_00023860	1	Hspd1-ps3	ENSMUST00000119713	ENSMUST00000119713	=	TSS14298;
XLOC_035881	8.85597051	1.21641413	0.008685381	0.592152203	TCONS_00109478	1	Kcna3	ENSMUST00000052718	ENSMUST00000052718	=	TSS65494;
XLOC_009541	5.987673759	1.243642701	0.009968374	0.592152203	TCONS_00030339	1	Gm12183	ENSMUST00000120566	ENSMUST00000120566	=	TSS17932;
XLOC_007732	7.35038063	1.246521285	0.007655523	0.592152203	TCONS_00023370	1	Akt2-ps	ENSMUST00000120718	ENSMUST00000120718	=	TSS13977;
XLOC_012258	6.866302121	1.281550495	0.006063009	0.592152203	TCONS_00038933	1	Fam181a	ENSMUST00000191218	ENSMUST00000191218	=	TSS23061;
XLOC_064084	7.446456332	1.304269475	0.00823349	0.592152203	TCONS_00197270	1	Armcx6	ENSMUST00000113194	ENSMUST00000113194	=	TSS117249;
XLOC_032674	8.367967908	1.305513877	0.006938456	0.592152203	TCONS_00099738	1	Lrp1b	ENSMUST00000129974	ENSMUST00000129974	=	TSS59690;
XLOC_001482	7.621111833	1.323158553	0.001910045	0.592152203	TCONS_00004858	1	Gm20743	ENSMUST00000191735	ENSMUST00000191735	=	TSS2809;
XLOC_058792	7.419640025	1.344815798	0.009335985	0.592152203	TCONS_00181486	1	Parp16	CUFF.72995.2	ENSMUST00000216486	j	TSS107950;
XLOC_040475	14.60132685	1.346435089	0.004969366	0.592152203	TCONS_00123488	1	Tnc	CUFF.49647.1	ENSMUST00000107372	j	TSS73818;
XLOC_017639	8.659107714	1.346547215	0.004120449	0.592152203	TCONS_00052991	1	Il17rd	ENSMUST00000035336	ENSMUST00000035336	=	TSS31850;
XLOC_029342	5.037602337	1.396134359	0.007284638	0.592152203	TCONS_00087800	1	Taf6l	CUFF.36351.1	ENSMUST00000176496	o	TSS52847;
XLOC_042174	8.789240801	1.45341292	0.00927554	0.592152203	TCONS_00128092	1	Sema3a	ENSMUST00000196514	ENSMUST00000196514	=	TSS76760;
XLOC_023906	13.77437839	1.491324802	0.001490237	0.584899109	TCONS_00072014	1	Adamts1	CUFF.29672.3	ENSMUST00000125897	=	TSS43207;
XLOC_049119	8.301640354	1.49577568	0.006912725	0.592152203	TCONS_00151444	1	Grin2b	CUFF.61546.7	ENSMUST00000111905	j	TSS90218;
XLOC_008534	7.994299908	1.52676288	0.008971645	0.592152203	TCONS_00026465	1	Ccl12	ENSMUST00000000194	ENSMUST00000000194	=	TSS15708;
XLOC_020697	11.89233419	1.539323703	0.00711102	0.592152203	TCONS_00061437	1	Cthrc1	ENSMUST00000067072	ENSMUST00000067072	=	TSS37050;
XLOC_021409	9.766645437	1.552769125	0.005317191	0.592152203	TCONS_00063958	1	Fbxl7	CUFF.24509.3	ENSMUST00000059204	j	TSS38519;
XLOC_063297	5.444390996	1.558294114	0.001191234	0.568584435	TCONS_00195210	1	Btbd35f1	CUFF.75818.1	ENSMUST00000178070	x	TSS116018;
XLOC_014903	9.775700872	1.570703314	0.009347126	0.592152203	TCONS_00045410	1	Gm2762	CUFF.18696.1	ENSMUST00000201517	o	TSS27290;
XLOC_037863	10.05309204	1.579841771	0.002043814	0.592152203	TCONS_00115743	1	St6galnac5	CUFF.48060.1	ENSMUST00000044278	j	TSS69145;
XLOC_004700	7.538221674	1.644997555	0.004421406	0.592152203	TCONS_00014301	1	Bend3	ENSMUST00000167488	ENSMUST00000167488	=	TSS8482;
XLOC_051784	5.017947749	1.723545067	0.006085965	0.592152203	TCONS_00159698	1	Gm9333	ENSMUST00000205452	ENSMUST00000205452	=	TSS95185;
XLOC_020695	6.385565217	1.774073128	0.004429311	0.592152203	TCONS_00061431	1		CUFF.24911.1		u	TSS37048;
XLOC_053518	6.17519472	1.834245345	0.007665742	0.592152203	TCONS_00165167	1	AU020206	CUFF.64499.2	ENSMUST00000181224	j	TSS98318;
XLOC_023237	6.348330166	1.834729063	0.005732148	0.592152203	TCONS_00069537	1	Ncam2	CUFF.29634.1	ENSMUST00000067602	o	TSS41812;
XLOC_036686	10.21119044	1.840494639	0.001532815	0.590682691	TCONS_00111867	1	Slc7a11	ENSMUST00000194462	ENSMUST00000194462	=	TSS66889;
XLOC_026343	9.590029889	1.88963532	0.006296806	0.592152203	TCONS_00079711	1	Cd70	CUFF.32431.1	ENSMUST00000019633	j	TSS47767;
XLOC_039345	10.03821514	2.110620292	0.005395675	0.592152203	TCONS_00119437	1	Ptch2	ENSMUST00000030443	ENSMUST00000030443	=	TSS71544;
XLOC_011925	7.446716558	2.208574388	0.003272945	0.592152203	TCONS_00037753	1	Prkch	CUFF.15810.1	ENSMUST00000221153	o	TSS22350;
XLOC_013298	8.870820974	2.264781679	0.009096798	0.592152203	TCONS_00042042	1	Gm21319	CUFF.16451.1	ENSMUST00000164517	o	TSS24944;
XLOC_038843	5.043832039	2.334902229	0.001777067	0.592152203	TCONS_00117740	1		CUFF.49349.1		u	TSS70525;
XLOC_059065	5.401116035	2.434929591	0.003558457	0.592152203	TCONS_00182442	1	Adamts7	ENSMUST00000113059	ENSMUST00000113059	=	TSS108498;
XLOC_040200	5.014535485	3.098762926	0.006324735	0.592152203	TCONS_00122443	1	Gm6297	ENSMUST00000181475	ENSMUST00000181475	=	TSS73258;
XLOC_003361	6.684896101	3.387469245	0.005757507	0.592152203	TCONS_00011216	1	Gm15852	CUFF.4137.1	ENSMUST00000159701	=	TSS6461;
XLOC_053109	5.248077698	3.435218574	0.009137862	0.592152203	TCONS_00164447	1	Luzp2	CUFF.63902.1	ENSMUST00000082373	x	TSS97780;
XLOC_015214	6.011056857	3.50394663	0.008694602	0.592152203	TCONS_00046370	1	Slc9a3	CUFF.19377.1	ENSMUST00000221703	o	TSS27842;
XLOC_050586	5.15243854	3.877383962	0.006984651	0.592152203	TCONS_00155065	1	Gm15470	CUFF.63362.1	ENSMUST00000119135	=	TSS92544;
