# Supplementary material for: Loss of Tsc1 in cerebellar Purkinje cells induces transcriptional and translation changes in FMRP target transcripts
Source: eLife. 2021 Jul 14;10:e67399. doi: 10.7554/eLife.67399 (PMC8279760; doi:10.7554/eLife.67399)
Supplement: Supplementary file 3. [file elife-67399-supp3.csv]

CUFF_ID	Mean.exp	FC	p.value	FDR	transcript_id	exon_number	gene_name	oId	nearest_ref	class_code	tss_id
1	XLOC_000252	3.131956082	1.944428777	0.000378399	0.401020567	TCONS_00000665	1	Arid5a	ENSMUST00000126413	ENSMUST00000126413	=	TSS411;
2	XLOC_000264	7.82084871	-1.957385877	0.008005724	0.638683044	TCONS_00000729	1	n-R5s210	ENSMUST00000177688	ENSMUST00000177688	=	TSS442;
3	XLOC_000362	8.678696046	-2.208648747	0.001157651	0.426625651	TCONS_00001118	1	n-R5s211	ENSMUST00000093689	ENSMUST00000093689	=	TSS664;
4	XLOC_000593	4.864743357	-2.574541057	0.004813769	0.58442984	TCONS_00001861	1	Gm25360	ENSMUST00000178786	ENSMUST00000178786	=	TSS1077;
5	XLOC_000596	6.731046547	-2.805984327	0.001096635	0.426625651	TCONS_00001869	1	Gm25939	ENSMUST00000179876	ENSMUST00000179876	=	TSS1086;
6	XLOC_000635	4.733017871	1.562813499	0.009593306	0.638683044	TCONS_00002031	1	Ttll4	ENSMUST00000042125	ENSMUST00000042125	=	TSS1176;
7	XLOC_000660	5.523334854	-1.063375654	0.000386919	0.401020567	TCONS_00002209	1	Slc4a3	ENSMUST00000124341	ENSMUST00000124341	=	TSS1261;
8	XLOC_000701	5.133759063	-2.050536429	0.002874219	0.489126624	TCONS_00002312	1	n-R5s213	ENSMUST00000083121	ENSMUST00000083121	=	TSS1327;
9	XLOC_001475	2.093697186	3.405501369	0.002290755	0.449575462	TCONS_00004849	1	Gm32391	CUFF.3956.1	ENSMUST00000191839	j	TSS2800;
10	XLOC_001691	6.013044141	-1.008085772	0.009891056	0.638683044	TCONS_00005582	1	Parp1	ENSMUST00000194608	ENSMUST00000194608	=	TSS3227;
11	XLOC_002073	5.600001261	-2.653762306	0.007162503	0.635803733	TCONS_00006683	1	n-R5s209	ENSMUST00000179494	ENSMUST00000179494	=	TSS3900;
12	XLOC_002654	4.515614221	-1.47675936	0.006111403	0.62272004	TCONS_00008710	1	Pde6d	CUFF.2078.1	ENSMUST00000143674	j	TSS5049;
13	XLOC_002715	3.761205444	-1.383856083	0.009941905	0.638683044	TCONS_00008889	1	Per2	ENSMUST00000069620	ENSMUST00000069620	=	TSS5145;
14	XLOC_003396	5.012008258	-3.42205393	0.002004988	0.449575462	TCONS_00011407	1	B930036N10Rik	ENSMUST00000181170	ENSMUST00000181170	=	TSS6547;
15	XLOC_003619	3.805135634	-1.255928083	0.003038706	0.494260158	TCONS_00012238	1	Nenf	ENSMUST00000046770	ENSMUST00000046770	=	TSS7022;
16	XLOC_004425	3.32475166	1.772459034	0.009438051	0.638683044	TCONS_00013412	1	Plagl1	ENSMUST00000193426	ENSMUST00000193426	=	TSS7958;
17	XLOC_004728	3.489462106	-1.074969135	0.009452214	0.638683044	TCONS_00014364	1	Prep	CUFF.6576.1	ENSMUST00000099858	j	TSS8529;
18	XLOC_004814	2.378092125	1.574134912	0.009797229	0.638683044	TCONS_00014575	1	Msl3l2	CUFF.6670.1	ENSMUST00000217668	j	TSS8663;
19	XLOC_005142	4.293356501	-1.448463246	0.001966697	0.449575462	TCONS_00016060	1	Mfsd12	ENSMUST00000044844	ENSMUST00000044844	=	TSS9461;
20	XLOC_005986	3.522388209	3.139053612	0.003862851	0.542295987	TCONS_00018669	1	Tpd52l1	CUFF.6113.2	ENSMUST00000213528	j	TSS11053;
21	XLOC_006005	3.106989886	1.533852716	0.001695014	0.43847426	TCONS_00018709	1	Clvs2	CUFF.6177.4	ENSMUST00000019920	j	TSS11081;
22	XLOC_006590	3.93290849	1.467371461	0.003087383	0.494260158	TCONS_00020835	1	Prdm4	CUFF.7853.1	ENSMUST00000220032	j	TSS12272;
23	XLOC_007759	2.905793975	2.397398638	0.000969272	0.426625651	TCONS_00023442	1	Aftph	CUFF.9743.1	ENSMUST00000035350	x	TSS14021;
24	XLOC_008033	3.586148329	1.496562238	0.007630452	0.637435674	TCONS_00024318	1	Sar1b	ENSMUST00000020653	ENSMUST00000020653	=	TSS14562;
25	XLOC_008369	6.551573105	-1.456082951	0.000129011	0.275101665	TCONS_00025771	1	Atp2a3	ENSMUST00000163326	ENSMUST00000163326	=	TSS15327;
26	XLOC_008404	6.428837453	-2.202727457	0.00715277	0.635803733	TCONS_00025881	1	n-R5s71	ENSMUST00000093668	ENSMUST00000093668	=	TSS15389;
27	XLOC_008445	3.521240126	-1.129955473	0.005267885	0.606914894	TCONS_00026047	1	Mrm3	ENSMUST00000040577	ENSMUST00000040577	=	TSS15480;
28	XLOC_008796	4.570042783	-1.528614098	0.005973506	0.62272004	TCONS_00027471	1	Rapgefl1	ENSMUST00000107479	ENSMUST00000107479	=	TSS16306;
29	XLOC_008955	2.385494417	-2.729331629	0.005716594	0.6197894	TCONS_00028088	1	Gm22711	CUFF.13503.2	ENSMUST00000197029	o	TSS16668;
30	XLOC_008989	9.085712294	18.17142459	0.000120751	0.275101665	TCONS_00028205	1	E030025P04Rik	CUFF.13571.1	ENSMUST00000106710	x	TSS16733;
31	XLOC_010017	2.675261049	3.392696529	0.004140491	0.557755446	TCONS_00032157	1	Rflnb	CUFF.11831.1	ENSMUST00000021207	j	TSS18950;
32	XLOC_010154	3.665521522	1.379347898	0.006290703	0.62272004	TCONS_00032658	1	Znhit3	ENSMUST00000103195	ENSMUST00000103195	=	TSS19233;
33	XLOC_010508	3.348120987	1.111979831	0.002474558	0.452625356	TCONS_00034033	1	Ccdc43	ENSMUST00000092569	ENSMUST00000092569	=	TSS19997;
34	XLOC_010513	6.106890845	2.710396123	0.001285208	0.426625651	TCONS_00034074	1	Gfap	ENSMUST00000067444	ENSMUST00000067444	=	TSS20017;
35	XLOC_011383	4.187530648	1.143763159	0.008887017	0.638683044	TCONS_00036233	1	Laptm4a	CUFF.14409.1	ENSMUST00000020909	j	TSS21410;
36	XLOC_011547	2.076725388	2.946052809	0.008739151	0.638683044	TCONS_00036618	1	Taf1b	CUFF.14639.1	ENSMUST00000075954	j	TSS21657;
37	XLOC_012056	4.986312739	-1.041239818	0.000502725	0.422414877	TCONS_00038355	1	Ylpm1	CUFF.16283.1	ENSMUST00000021670	j	TSS22697;
38	XLOC_012768	3.90210419	1.051338637	0.002437054	0.449575462	TCONS_00040461	1	Trappc12	ENSMUST00000168129	ENSMUST00000168129	=	TSS23987;
39	XLOC_012953	3.258834025	-1.693181105	0.000361976	0.401020567	TCONS_00040931	1	Gm24305	ENSMUST00000179155	ENSMUST00000179155	=	TSS24267;
40	XLOC_013052	5.527890463	-2.073192675	0.003431333	0.518324061	TCONS_00041185	1	n-R5s60	ENSMUST00000083299	ENSMUST00000083299	=	TSS24436;
41	XLOC_013192	3.938533604	-3.137502783	0.004642293	0.574826902	TCONS_00041664	1	Scarna3b	ENSMUST00000157533	ENSMUST00000157533	=	TSS24725;
42	XLOC_013273	5.755648821	-1.709682052	0.001274241	0.426625651	TCONS_00041950	1	n-R5s64	ENSMUST00000102019	ENSMUST00000102019	=	TSS24890;
43	XLOC_013285	5.998457717	1.043277085	0.009984191	0.638683044	TCONS_00041978	1	Tmed8	CUFF.16398.1	ENSMUST00000037418	j	TSS24911;
44	XLOC_013296	3.975158766	-1.781899669	0.003892559	0.542295987	TCONS_00042031	1	Mir3068	ENSMUST00000197755	ENSMUST00000197755	=	TSS24941;
45	XLOC_013889	4.378791701	-2.200055452	0.001433941	0.427575733	TCONS_00043396	1	Gm25675	ENSMUST00000174979	ENSMUST00000174979	=	TSS25838;
46	XLOC_015448	9.466933053	-2.220283239	0.001283054	0.426625651	TCONS_00047060	1	n-R5s56	ENSMUST00000082521	ENSMUST00000082521	=	TSS28254;
47	XLOC_015483	2.074892792	3.557534518	0.001361141	0.427575733	TCONS_00047198	1	Pde4d	CUFF.20333.1	ENSMUST00000151111	o	TSS28337;
48	XLOC_015728	5.423420943	1.051513149	0.002081958	0.449575462	TCONS_00047978	1	Rala	ENSMUST00000009003	ENSMUST00000009003	=	TSS28766;
49	XLOC_016115	4.472356213	1.10022577	0.003766523	0.535776936	TCONS_00048994	1	Dek	ENSMUST00000138401	ENSMUST00000138401	=	TSS29396;
50	XLOC_016770	4.305366573	1.038596742	0.006322619	0.62272004	TCONS_00051361	1	Kif2a	ENSMUST00000022204	ENSMUST00000022204	=	TSS30710;
51	XLOC_017698	4.586760991	1.142024191	0.007536127	0.635803733	TCONS_00053346	1	Parg	ENSMUST00000164137	ENSMUST00000164137	=	TSS32009;
52	XLOC_017809	3.465966817	6.150040631	7.06e-05	0.260248828	TCONS_00053630	1	AC166344.3	CUFF.21963.3	ENSMUST00000228505	j	TSS32192;
53	XLOC_018255	2.516415086	4.250937167	0.001338368	0.427575733	TCONS_00054822	1	Adcy4	CUFF.22408.1	ENSMUST00000226361	x	TSS32929;
54	XLOC_018673	7.332316589	-2.169911037	0.001256276	0.426625651	TCONS_00056042	1	n-R5s50	ENSMUST00000083168	ENSMUST00000083168	=	TSS33674;
55	XLOC_019122	8.03515749	-2.716095862	0.002239231	0.449575462	TCONS_00057517	1	n-R5s46	ENSMUST00000083960	ENSMUST00000083960	=	TSS34504;
56	XLOC_019678	7.70412853	1.408078736	5.05e-06	0.092957628	TCONS_00059313	1	Rhobtb2	ENSMUST00000022665	ENSMUST00000022665	=	TSS35552;
57	XLOC_019736	3.807934657	1.860575802	0.002420654	0.449575462	TCONS_00059547	1	Gtf2f2	CUFF.23094.1	ENSMUST00000088922	j	TSS35690;
58	XLOC_019759	7.735079042	-2.287255782	0.000991742	0.426625651	TCONS_00059591	1	Gm26197	ENSMUST00000175033	ENSMUST00000175033	=	TSS35724;
59	XLOC_020854	2.36743893	4.266573656	0.000133008	0.275101665	TCONS_00061894	1	Tg	ENSMUST00000065916	ENSMUST00000065916	=	TSS37333;
60	XLOC_021008	4.953105912	1.275162134	0.008685922	0.638683044	TCONS_00062548	1	Sgsm3	CUFF.26162.3	ENSMUST00000139517	j	TSS37690;
61	XLOC_021034	4.014852296	-2.75149404	0.007532703	0.635803733	TCONS_00062689	1	n-R5s41	ENSMUST00000083025	ENSMUST00000083025	=	TSS37772;
62	XLOC_021044	8.14131756	-2.25471916	0.002830316	0.484723112	TCONS_00062733	1	Rnu12	ENSMUST00000083242	ENSMUST00000083242	=	TSS37795;
63	XLOC_021053	4.53211839	2.547828691	0.005474534	0.608184171	TCONS_00062771	1	Parvb	CUFF.26393.2	ENSMUST00000023072	j	TSS37818;
64	XLOC_021233	4.113193438	1.288569204	0.001317043	0.426658563	TCONS_00063443	1	Igfbp6	CUFF.27144.1	ENSMUST00000023807	j	TSS38215;
65	XLOC_022782	4.877385641	1.032279061	0.003597675	0.531920823	TCONS_00067608	1	Mkl2	CUFF.27725.1	ENSMUST00000009713	j	TSS40798;
66	XLOC_023145	3.055718938	6.111437875	6.91e-06	0.092957628	TCONS_00069309	1	Tomm70a	ENSMUST00000166897	ENSMUST00000166897	=	TSS41665;
67	XLOC_023425	3.305574789	1.78142316	0.005693468	0.6197894	TCONS_00070299	1	Cpped1	CUFF.27705.1	ENSMUST00000096272	j	TSS42231;
68	XLOC_023790	8.789357155	17.57871431	1.17e-05	0.104628659	TCONS_00071636	1	Tbc1d23	CUFF.29337.2	ENSMUST00000226586	o	TSS42975;
69	XLOC_023985	5.390287391	2.11269891	0.000120562	0.275101665	TCONS_00072254	1	Rcan1	ENSMUST00000023672	ENSMUST00000023672	=	TSS43362;
70	XLOC_025185	8.483416221	-1.397604534	0.00014978	0.28766372	TCONS_00075314	1	Gabbr1	CUFF.31832.2	ENSMUST00000025338	j	TSS45334;
71	XLOC_025317	5.509014256	-2.143502976	0.003694783	0.531920823	TCONS_00075780	1	n-R5s28	ENSMUST00000082814	ENSMUST00000082814	=	TSS45607;
72	XLOC_025917	3.874360985	-1.38927797	0.002240183	0.449575462	TCONS_00077972	1	Ppil1	ENSMUST00000024802	ENSMUST00000024802	=	TSS46852;
73	XLOC_026378	5.159277612	1.363546647	0.008770927	0.638683044	TCONS_00079792	1	Rab31	CUFF.32530.1	ENSMUST00000070673	j	TSS47822;
74	XLOC_027292	4.881636259	-1.97513018	0.000589012	0.426625651	TCONS_00081485	1	n-R5s25	ENSMUST00000082923	ENSMUST00000082923	=	TSS49058;
75	XLOC_027600	3.887946874	-1.359633135	0.000992129	0.426625651	TCONS_00082665	1	Skor2	CUFF.35621.1	ENSMUST00000166956	j	TSS49752;
76	XLOC_027817	2.084496367	3.388636104	0.002281016	0.449575462	TCONS_00083434	1	Apc	CUFF.34396.1	ENSMUST00000115781	x	TSS50170;
77	XLOC_028996	3.480398031	2.432520457	0.005693694	0.6197894	TCONS_00086374	1	Ifit2	CUFF.37234.1	ENSMUST00000149829	=	TSS52062;
78	XLOC_029205	5.02266063	-1.078381072	0.000402691	0.401020567	TCONS_00087174	1	Fam45a	CUFF.38267.2	ENSMUST00000025957	j	TSS52525;
79	XLOC_029434	3.964564609	2.412553704	0.002218483	0.449575462	TCONS_00088096	1	Dtx4	CUFF.36514.2	ENSMUST00000045521	j	TSS53011;
80	XLOC_030535	5.708571558	-1.250385541	0.00124254	0.426625651	TCONS_00090832	1	Rnf208	ENSMUST00000154498	ENSMUST00000154498	=	TSS54751;
81	XLOC_030596	7.645925575	1.413624425	0.00022696	0.358970274	TCONS_00091168	1	Olfm1	ENSMUST00000152415	ENSMUST00000152415	=	TSS54932;
82	XLOC_031447	3.856389468	-2.375564458	0.004404427	0.563934392	TCONS_00094385	1	Gm25189	ENSMUST00000083911	ENSMUST00000083911	=	TSS56820;
83	XLOC_031484	5.068149434	-2.733631043	0.000483921	0.419731393	TCONS_00094557	1	n-R5s204	ENSMUST00000082972	ENSMUST00000082972	=	TSS56913;
84	XLOC_031580	3.74210496	5.746234396	7.74e-05	0.260248828	TCONS_00095056	1	Bcl2l11	CUFF.42517.1	ENSMUST00000103210	j	TSS57174;
85	XLOC_031809	5.928542042	2.190245205	0.002201881	0.449575462	TCONS_00095895	1	Srxn1	ENSMUST00000137751	ENSMUST00000137751	=	TSS57665;
86	XLOC_031813	5.529840415	1.924695263	0.004137308	0.557755446	TCONS_00095909	1	Tbc1d20	CUFF.43380.1	ENSMUST00000028963	j	TSS57672;
87	XLOC_031923	4.018560704	-1.087679908	0.003698135	0.531920823	TCONS_00096445	1	Vstm2l	ENSMUST00000109523	ENSMUST00000109523	=	TSS57935;
88	XLOC_032214	6.152929653	2.871880938	9.01e-05	0.26912504	TCONS_00097504	1	Rtel1	CUFF.44264.3	ENSMUST00000054622	j	TSS58531;
89	XLOC_032240	6.389056854	1.82022551	2.62e-05	0.140892869	TCONS_00097681	1	Hspa14	CUFF.38338.1	ENSMUST00000027961	j	TSS58620;
90	XLOC_032487	3.953546158	-1.751118075	0.005024392	0.592525635	TCONS_00098843	1	Gm25541	ENSMUST00000116888	ENSMUST00000116888	=	TSS59230;
91	XLOC_032896	2.839550658	2.326008364	0.003033297	0.494260158	TCONS_00100636	1	Prkra	CUFF.40808.2	ENSMUST00000002808	j	TSS60165;
92	XLOC_033456	3.092091363	-1.596979468	0.000852145	0.426625651	TCONS_00102522	1	n-R5s205	ENSMUST00000083149	ENSMUST00000083149	=	TSS61295;
93	XLOC_033662	2.865446518	-1.602001318	0.007372436	0.635803733	TCONS_00103458	1	Gm26165	ENSMUST00000083791	ENSMUST00000083791	=	TSS61786;
94	XLOC_033969	7.654792712	-2.01128781	0.001424257	0.427575733	TCONS_00104611	1	Gm23152	ENSMUST00000175322	ENSMUST00000175322	=	TSS62404;
95	XLOC_034135	8.615508496	1.127905187	0.001169853	0.426625651	TCONS_00105199	1	Stmn3	ENSMUST00000103045	ENSMUST00000103045	=	TSS62735;
96	XLOC_036624	3.723422064	-1.662267232	0.004825328	0.58442984	TCONS_00111748	1	n-R5s195	ENSMUST00000082891	ENSMUST00000082891	=	TSS66806;
97	XLOC_037229	4.322689203	-1.229590739	0.00125706	0.426625651	TCONS_00113604	1	Prune1	ENSMUST00000015855	ENSMUST00000015855	=	TSS67902;
98	XLOC_038851	7.23796951	-1.604115417	0.008263897	0.638683044	TCONS_00117775	1	Tmem38b	ENSMUST00000030127	ENSMUST00000030127	=	TSS70543;
99	XLOC_038900	4.001396722	1.353470974	0.000762175	0.426625651	TCONS_00117914	1	E130308A19Rik	CUFF.49557.4	ENSMUST00000052420	=	TSS70624;
100	XLOC_038928	2.301177943	-2.051915927	0.004938059	0.587497914	TCONS_00117958	1	Slc31a2	ENSMUST00000107468	ENSMUST00000107468	=	TSS70661;
101	XLOC_039259	2.723849103	1.600115819	0.002692618	0.472727466	TCONS_00119025	1	Cc2d1b	CUFF.50694.3	ENSMUST00000030320	j	TSS71318;
102	XLOC_039349	6.331859415	-2.783546908	0.005768624	0.620427043	TCONS_00119451	1	Gm25099	ENSMUST00000093716	ENSMUST00000093716	=	TSS71553;
103	XLOC_039450	3.351328468	-1.862100256	0.00868162	0.638683044	TCONS_00119785	1	Mycbp	ENSMUST00000030400	ENSMUST00000030400	=	TSS71756;
104	XLOC_039492	5.386974939	-1.068475349	0.001978951	0.449575462	TCONS_00119972	1	Sfpq	CUFF.51460.1	ENSMUST00000030623	j	TSS71854;
105	XLOC_039540	5.032356045	2.006683769	0.005856179	0.62272004	TCONS_00120228	1	Fabp3	ENSMUST00000070532	ENSMUST00000070532	=	TSS71999;
106	XLOC_039553	5.31551684	2.518905671	0.001925678	0.449575462	TCONS_00120287	1		CUFF.51792.1		u	TSS72030;
107	XLOC_039868	10.14367452	-1.806062169	0.003094568	0.494260158	TCONS_00121324	1	n-R5s193	ENSMUST00000082864	ENSMUST00000082864	=	TSS72632;
108	XLOC_039898	7.634720119	-1.07012208	0.005571241	0.611426666	TCONS_00121450	1	Icmt	ENSMUST00000048892	ENSMUST00000048892	=	TSS72713;
109	XLOC_040315	6.922642945	-1.026943581	0.000246284	0.36789337	TCONS_00122965	1	Gabbr2	CUFF.49211.3	ENSMUST00000129328	=	TSS73519;
110	XLOC_040328	5.283486463	-2.374128613	0.000723892	0.426625651	TCONS_00123012	1	Gm24573	ENSMUST00000175499	ENSMUST00000175499	=	TSS73550;
111	XLOC_040637	4.443127922	1.153597719	0.006527825	0.63031561	TCONS_00123974	1	Plaa	CUFF.50151.4	ENSMUST00000107107	j	TSS74095;
112	XLOC_040886	3.267572889	-1.325879182	0.007362464	0.635803733	TCONS_00124863	1	Szt2	ENSMUST00000075406	ENSMUST00000075406	=	TSS74630;
113	XLOC_040971	5.004269506	1.204903167	0.00395373	0.54797876	TCONS_00125149	1	Akirin1	ENSMUST00000102636	ENSMUST00000102636	=	TSS74811;
114	XLOC_041101	7.212340594	-2.188870043	0.00767483	0.637435674	TCONS_00125661	1	Rnu11	ENSMUST00000104135	ENSMUST00000104135	=	TSS75099;
115	XLOC_041128	7.012424372	1.043928439	0.008209836	0.638683044	TCONS_00125743	1	Trnp1	ENSMUST00000125541	ENSMUST00000125541	=	TSS75146;
116	XLOC_041397	4.190905983	-1.154005851	0.003373615	0.518324061	TCONS_00126744	1	Slc45a1	CUFF.52400.1	ENSMUST00000037827	=	TSS75742;
117	XLOC_042767	5.011113984	-2.006738237	0.005496458	0.608184171	TCONS_00130201	1	Dancr	ENSMUST00000066220	ENSMUST00000132389	=	TSS78010;
118	XLOC_042802	2.260690802	3.503394786	0.002162148	0.449575462	TCONS_00130369	1	Thegl	CUFF.54665.1	ENSMUST00000117880	j	TSS78115;
119	XLOC_042911	4.80576926	-2.51098273	0.001615352	0.43847426	TCONS_00130688	1	Gm22816	ENSMUST00000157450	ENSMUST00000157450	=	TSS78306;
120	XLOC_043418	2.918986547	1.245007407	0.003785987	0.535776936	TCONS_00132591	1	Gtf2h3	ENSMUST00000031333	ENSMUST00000031333	=	TSS79405;
121	XLOC_043686	5.23095936	-1.289361937	0.009390918	0.638683044	TCONS_00133652	1	Fam220a	ENSMUST00000169329	ENSMUST00000169329	=	TSS79996;
122	XLOC_043777	5.775511894	1.713634909	7.52e-05	0.260248828	TCONS_00134009	1	Gm20488	CUFF.57462.1	ENSMUST00000201641	j	TSS80203;
123	XLOC_044807	8.85834854	1.067308634	0.001549381	0.43847426	TCONS_00137521	1	Cplx1	CUFF.55472.2	ENSMUST00000046892	j	TSS82177;
124	XLOC_045027	4.90394918	1.365261604	0.004703285	0.574826902	TCONS_00138494	1	Ift81	CUFF.56195.2	ENSMUST00000031426	j	TSS82707;
125	XLOC_046022	4.699561775	2.082751754	0.000440416	0.40664032	TCONS_00141097	1	Peg10	ENSMUST00000166678	ENSMUST00000176204	=	TSS84346;
126	XLOC_046513	5.044290987	1.228983557	0.006824748	0.63031561	TCONS_00142718	1	Snx10	ENSMUST00000049152	ENSMUST00000049152	=	TSS85264;
127	XLOC_046612	5.845217033	-2.132208525	0.000620987	0.426625651	TCONS_00143076	1	n-R5s162	ENSMUST00000082581	ENSMUST00000082581	=	TSS85468;
128	XLOC_047129	11.0372613	-1.029878559	0.004673095	0.574826902	TCONS_00144729	1	Itpr1	ENSMUST00000032192	ENSMUST00000032192	=	TSS86405;
129	XLOC_047152	2.771675796	3.795194962	0.003611444	0.531920823	TCONS_00144798	1	Lmcd1	CUFF.60560.1	ENSMUST00000032376	j	TSS86450;
130	XLOC_048477	4.838065569	1.24977072	0.000426865	0.40664032	TCONS_00149084	1	Paip2b	ENSMUST00000058383	ENSMUST00000058383	=	TSS88935;
131	XLOC_048561	5.559944778	-1.077459461	0.001541682	0.43847426	TCONS_00149417	1	Podxl2	ENSMUST00000141401	ENSMUST00000141401	=	TSS89101;
132	XLOC_048672	2.312397975	2.937057495	0.004987689	0.59078843	TCONS_00149852	1	Pdzrn3	CUFF.60435.3	ENSMUST00000075994	j	TSS89346;
133	XLOC_049229	4.550042483	-1.160237627	0.006302841	0.62272004	TCONS_00151894	1	Tmtc1	CUFF.61922.3	ENSMUST00000060095	j	TSS90459;
134	XLOC_049833	2.857360393	-2.445261279	0.000627949	0.426625651	TCONS_00152896	1	n-R5s150	ENSMUST00000122705	ENSMUST00000122705	=	TSS91224;
135	XLOC_050019	7.834262596	-1.968779253	0.002359203	0.449575462	TCONS_00153324	1	n-R5s151	ENSMUST00000083959	ENSMUST00000083959	=	TSS91512;
136	XLOC_050894	6.425372233	-1.182033372	0.001406493	0.427575733	TCONS_00156343	1	Pcsk6	ENSMUST00000176199	ENSMUST00000176199	=	TSS93221;
137	XLOC_051095	2.097376362	4.192446336	0.000369346	0.401020567	TCONS_00157010	1	Gm2115	ENSMUST00000180387	ENSMUST00000180387	=	TSS93612;
138	XLOC_051232	7.515536052	1.115677402	0.006131812	0.62272004	TCONS_00157417	1	Pak1	ENSMUST00000205757	ENSMUST00000205757	=	TSS93854;
139	XLOC_051254	7.019531565	1.580523867	0.004858193	0.585771755	TCONS_00157494	1	Arrb1	CUFF.65170.4	ENSMUST00000179755	j	TSS93904;
140	XLOC_051772	6.608883859	2.538322819	0.001183897	0.426625651	TCONS_00159641	1	Lhpp	ENSMUST00000148669	ENSMUST00000148669	=	TSS95157;
141	XLOC_052424	6.876250652	1.918101139	0.009663715	0.638683044	TCONS_00161870	1	Apoe	CUFF.62584.4	ENSMUST00000172983	j	TSS96370;
142	XLOC_052775	3.593471182	-2.267191043	0.001102313	0.426625651	TCONS_00163190	1	Chst8	CUFF.63158.1	ENSMUST00000078686	j	TSS97097;
143	XLOC_055585	3.219016496	3.064718124	0.002966972	0.494260158	TCONS_00171318	1	Casp3	ENSMUST00000211115	ENSMUST00000211115	=	TSS101971;
144	XLOC_055597	4.746855048	-2.390825717	0.001950876	0.449575462	TCONS_00171361	1	n-R5s96	ENSMUST00000082574	ENSMUST00000082574	=	TSS101996;
145	XLOC_056005	3.076063858	2.494504255	0.001855262	0.449575462	TCONS_00172844	1	Gm10638	ENSMUST00000098532	ENSMUST00000098532	=	TSS102830;
146	XLOC_056292	4.37830094	1.413491899	0.006946822	0.635327079	TCONS_00174022	1	Terf2ip	CUFF.70283.1	ENSMUST00000052138	j	TSS103462;
147	XLOC_056424	3.338133787	-2.288397861	0.005206135	0.606914894	TCONS_00174506	1	n-R5s93	ENSMUST00000180091	ENSMUST00000180091	=	TSS103716;
148	XLOC_057488	4.578443901	1.296445469	2.11e-05	0.140892869	TCONS_00178086	1	Gcsh	CUFF.70401.1	ENSMUST00000040484	j	TSS105726;
149	XLOC_058694	5.955692155	-1.014641825	0.000667073	0.426625651	TCONS_00181097	1	Sema7a	ENSMUST00000214314	ENSMUST00000214314	=	TSS107727;
150	XLOC_058786	4.642338294	1.567694073	0.004393321	0.563934392	TCONS_00181442	1	Dennd4a	CUFF.72947.1	ENSMUST00000038890	j	TSS107927;
151	XLOC_058845	2.067266869	2.760389669	0.00369939	0.531920823	TCONS_00181739	1	Myo1e	ENSMUST00000213863	ENSMUST00000213863	=	TSS108074;
152	XLOC_059181	6.756434231	-2.074770481	0.00306077	0.494260158	TCONS_00182828	1	n-R5s88	ENSMUST00000083173	ENSMUST00000083173	=	TSS108717;
153	XLOC_059763	4.062128225	1.128755889	0.007233615	0.635803733	TCONS_00185482	1	Acad8	ENSMUST00000129490	ENSMUST00000129490	=	TSS110118;
154	XLOC_060135	4.343200818	-1.367483065	0.006517543	0.63031561	TCONS_00186867	1	Etfa	CUFF.72483.2	ENSMUST00000034866	j	TSS110891;
155	XLOC_060616	4.714655532	1.318402641	0.002162941	0.449575462	TCONS_00188591	1	Mrps22	ENSMUST00000035034	ENSMUST00000035034	=	TSS111853;
156	XLOC_060624	3.555561299	1.934060556	0.000658838	0.426625651	TCONS_00188608	1	Pik3cb	ENSMUST00000035037	ENSMUST00000035037	=	TSS111866;
157	XLOC_060920	5.539023127	-1.921145554	0.001420716	0.427575733	TCONS_00190024	1	Cck	ENSMUST00000216176	ENSMUST00000216176	=	TSS112593;
158	XLOC_061691	4.360146484	-2.175379414	0.000347749	0.401020567	TCONS_00190998	1	n-R5s2	ENSMUST00000101968	ENSMUST00000101968	=	TSS113435;
159	XLOC_062275	4.768934797	1.381913581	0.001462993	0.427575733	TCONS_00192632	1	Brcc3	CUFF.76415.1	ENSMUST00000033544	j	TSS114418;
160	XLOC_062981	6.729472267	-1.783225748	0.000743214	0.426625651	TCONS_00194319	1	Gm23806	ENSMUST00000175157	ENSMUST00000175157	=	TSS115498;
161	XLOC_064107	4.272506963	1.038611921	0.003185744	0.494260158	TCONS_00197341	1	Tceal5	CUFF.77260.2	ENSMUST00000151592	=	TSS117294;
162	XLOC_064200	2.815796034	-2.109161932	0.007734082	0.63789571	TCONS_00197590	1	Amot	CUFF.77416.2	ENSMUST00000112835	j	TSS117435;
163	XLOC_064211	5.130250192	-2.164137471	0.001694457	0.43847426	TCONS_00197624	1	Gm25107	ENSMUST00000122472	ENSMUST00000122472	=	TSS117454;
164	XLOC_064281	6.147813652	2.137787599	0.004884578	0.586323803	TCONS_00197811	1	Sat1	CUFF.77582.1	ENSMUST00000152463	j	TSS117570;
165	XLOC_065575	6.689016705	-1.860005131	0.003412382	0.518324061	TCONS_00199675	1	n-R5s1	ENSMUST00000101925	ENSMUST00000101925	=	TSS119134;
