# Supplementary material for: Loss of Tsc1 in cerebellar Purkinje cells induces transcriptional and translation changes in FMRP target transcripts
Source: eLife. 2021 Jul 14;10:e67399. doi: 10.7554/eLife.67399 (PMC8279760; doi:10.7554/eLife.67399)
Supplement: Supplementary file 4. [file elife-67399-supp4.csv]

Gene ID	delta TE	SD	Z-score	transcript_id	exon_number	gene_name	oId	nearest_ref	class_code	tss_id
XLOC_008989	18.76434031	1.262303925	14.86515248	TCONS_00028205	1	E030025P04Rik	CUFF.13571.1	ENSMUST00000106710	x	TSS16733;
XLOC_023790	17.73613545	0.756953735	23.43093722	TCONS_00071636	1	Tbc1d23	CUFF.29337.2	ENSMUST00000226586	o	TSS42975;
XLOC_020854	8.815382242	0.6448141	13.67119957	TCONS_00061894	1	Tg	ENSMUST00000065916	ENSMUST00000065916	=	TSS37333;
XLOC_023145	6.141617728	0.18461482	33.26719771	TCONS_00069309	1	Tomm70a	ENSMUST00000166897	ENSMUST00000166897	=	TSS41665;
XLOC_030516	6.076365681	0.934010358	6.505672693	TCONS_00090745	1	Gm13417	CUFF.38947.1	ENSMUST00000155475	x	TSS54710;
XLOC_030482	6.029533113	1.406901384	4.285682835	TCONS_00090624	1	Gad2	ENSMUST00000028123	ENSMUST00000028123	=	TSS54646;
XLOC_039553	5.742979855	0.754007245	7.616610975	TCONS_00120287	1		CUFF.51792.1		u	TSS72030;
XLOC_058044	5.639344358	0.643491211	8.763669595	TCONS_00178879	1	Mmp20	CUFF.70760.1	ENSMUST00000034487	j	TSS106384;
XLOC_017809	5.531949523	0.537606582	10.28995869	TCONS_00053630	1	AC166344.3	CUFF.21963.3	ENSMUST00000228505	j	TSS32192;
XLOC_031580	5.399726479	0.348709923	15.48486616	TCONS_00095056	1	Bcl2l11	CUFF.42517.1	ENSMUST00000103210	j	TSS57174;
XLOC_025005	5.215948898	0.810965042	6.431780199	TCONS_00074529	1	Gm26858	ENSMUST00000180608	ENSMUST00000180608	=	TSS44894;
XLOC_048920	4.915886904	0.862468344	5.699788216	TCONS_00150903	1	Kcna5	CUFF.61310.1	ENSMUST00000060972	=	TSS89913;
XLOC_057020	4.876066436	0.785812298	6.205128688	TCONS_00176457	1	C430049E01Rik	ENSMUST00000207913	ENSMUST00000207913	=	TSS104813;
XLOC_000127	4.805296508	0.980078078	4.902973157	TCONS_00000379	1	Tfap2b	ENSMUST00000027059	ENSMUST00000027059	=	TSS224;
XLOC_015483	4.789501627	0.763031225	6.276940536	TCONS_00047198	1	Pde4d	CUFF.20333.1	ENSMUST00000151111	o	TSS28337;
XLOC_016194	4.724994589	0.747773634	6.318749914	TCONS_00049242	1	Cplx2	CUFF.18731.1	ENSMUST00000026985	x	TSS29542;
XLOC_009727	4.63764629	0.428416341	10.82509196	TCONS_00030952	1	Rasd1	CUFF.11053.1	ENSMUST00000062405	=	TSS18283;
XLOC_001475	4.595634312	0.44601211	10.30383303	TCONS_00004849	1	Gm32391	CUFF.3956.1	ENSMUST00000191839	j	TSS2800;
XLOC_047383	4.549258489	0.56189568	8.096268842	TCONS_00145815	1	Gm45869	CUFF.61311.1	ENSMUST00000210335	x	TSS87000;
XLOC_021478	4.52590997	0.654499101	6.915074384	TCONS_00064143	1	Rgs22	CUFF.24777.1	ENSMUST00000172831	j	TSS38649;
XLOC_038933	4.508179684	0.663296758	6.796625541	TCONS_00117971	1	Bspry	ENSMUST00000107449	ENSMUST00000107449	=	TSS70670;
XLOC_027175	4.414066791	0.947827393	4.657036525	TCONS_00081118	1	Lama3	ENSMUST00000092070	ENSMUST00000092070	=	TSS48841;
XLOC_054512	4.356658641	0.995308204	4.377195552	TCONS_00169094	1	Th	ENSMUST00000000219	ENSMUST00000000219	=	TSS100432;
XLOC_039525	4.354743054	0.307683342	14.15332735	TCONS_00120117	1	Marcksl1	CUFF.51651.2	ENSMUST00000062356	j	TSS71949;
XLOC_016920	4.342056572	0.806384233	5.384600041	TCONS_00051682	1		CUFF.17727.1		u	TSS30924;
XLOC_041235	4.338396093	0.416952505	10.40501267	TCONS_00126117	1	Gm13028	CUFF.51972.2	ENSMUST00000128563	x	TSS75381;
XLOC_002148	4.330039117	0.820185386	5.279341952	TCONS_00006853	1	Gm33222	CUFF.590.4	ENSMUST00000193725	j	TSS4014;
XLOC_000488	4.299252385	0.795934063	5.401518275	TCONS_00001559	1	Cd28	ENSMUST00000132833	ENSMUST00000132833	=	TSS905;
XLOC_051243	4.275470237	0.951590122	4.492974588	TCONS_00157457	1	Gm45187	ENSMUST00000209090	ENSMUST00000209090	=	TSS93878;
XLOC_039552	4.267280527	0.824669314	5.174535363	TCONS_00120286	1		CUFF.51790.2		u	TSS72029;
XLOC_034148	4.18725701	0.721456545	5.803893581	TCONS_00105288	1	Polr3k	CUFF.44329.1	ENSMUST00000039551	x	TSS62776;
XLOC_025483	4.184423421	0.99515757	4.204784796	TCONS_00076415	1		CUFF.32907.1		u	TSS45973;
XLOC_025321	4.171185297	1.013597745	4.115227482	TCONS_00075786	1		CUFF.32187.1		u	TSS45612;
XLOC_048947	4.170917267	0.73195651	5.698312958	TCONS_00151000	1	9330102E08Rik	ENSMUST00000204642	ENSMUST00000204642	=	TSS89964;
XLOC_051604	4.170296284	0.569954441	7.316894099	TCONS_00158809	1	Scnn1g	ENSMUST00000000221	ENSMUST00000000221	=	TSS94697;
XLOC_050244	4.141545366	1.030091069	4.020562348	TCONS_00153970	1	Zfp526	ENSMUST00000055604	ENSMUST00000055604	=	TSS91910;
XLOC_006850	4.117866124	0.899898548	4.575922621	TCONS_00021607	1	Ptprr	CUFF.8730.1	ENSMUST00000063470	x	TSS12740;
XLOC_058534	4.097893627	0.552638895	7.415137926	TCONS_00180443	1	Jaml	CUFF.72038.1	ENSMUST00000050020	j	TSS107355;
XLOC_036398	4.074178422	0.798751171	5.100685379	TCONS_00111093	1	Zfp704	ENSMUST00000041124	ENSMUST00000041124	=	TSS66444;
XLOC_037493	4.043190908	0.716607297	5.642129133	TCONS_00114537	1	Ntng1	ENSMUST00000156177	ENSMUST00000156177	=	TSS68427;
XLOC_056668	4.038680192	0.705489577	5.724648985	TCONS_00175212	1	Got1l1	CUFF.67630.3	ENSMUST00000038174	j	TSS104141;
XLOC_014586	4.037145247	0.57250156	7.051762871	TCONS_00044500	1	Cmah	ENSMUST00000224953	ENSMUST00000224953	=	TSS26700;
XLOC_055233	4.025313422	0.796389554	5.054452816	TCONS_00170341	1		CUFF.67193.1		u	TSS101376;
XLOC_038608	3.987636423	0.785554148	5.076208222	TCONS_00116987	1	Gm11942	ENSMUST00000180255	ENSMUST00000180255	=	TSS70070;
XLOC_032169	3.98123863	0.806314388	4.937576072	TCONS_00097332	1	Cdh26	ENSMUST00000108912	ENSMUST00000108912	=	TSS58437;
XLOC_025462	3.980736452	0.931077336	4.275409032	TCONS_00076305	1	Togaram2	ENSMUST00000156665	ENSMUST00000156665	=	TSS45911;
XLOC_003004	3.966627672	0.617274257	6.426037739	TCONS_00009858	1	Fmod	CUFF.3124.1	ENSMUST00000048183	x	TSS5720;
XLOC_000265	3.960896604	0.791299184	5.005561338	TCONS_00000730	1	Vwa3b	ENSMUST00000117172	ENSMUST00000117172	=	TSS443;
XLOC_029255	3.950183147	0.961156881	4.10982143	TCONS_00087428	1	Tmem151a	CUFF.36106.2	ENSMUST00000077066	j	TSS52644;
XLOC_041219	3.946962587	0.85439277	4.619611408	TCONS_00126058	1	Pla2g2f	CUFF.51919.3	ENSMUST00000030526	j	TSS75351;
XLOC_046602	3.946451217	0.4741691	8.322877259	TCONS_00143028	1	Abcg2	ENSMUST00000147213	ENSMUST00000147213	=	TSS85439;
XLOC_010017	3.932249871	0.504121387	7.800204424	TCONS_00032157	1	Rflnb	CUFF.11831.1	ENSMUST00000021207	j	TSS18950;
XLOC_010605	3.922164947	0.722972261	5.425055926	TCONS_00034458	1	Abca6	CUFF.13596.3	ENSMUST00000044003	j	TSS20246;
XLOC_015599	3.907785649	0.75877752	5.150107306	TCONS_00047568	1	Net1	ENSMUST00000099946	ENSMUST00000099946	=	TSS28525;
XLOC_023015	3.905749922	0.873389963	4.471942762	TCONS_00068786	1		CUFF.28739.1		u	TSS41382;
XLOC_043541	3.870777017	0.415082355	9.325322962	TCONS_00133077	1	Hspb1	ENSMUST00000005077	ENSMUST00000005077	=	TSS79681;
XLOC_038774	3.870399275	0.661086797	5.854600773	TCONS_00117535	1	Ccdc180	ENSMUST00000127261	ENSMUST00000127261	=	TSS70391;
XLOC_020417	3.864677175	0.68827391	5.615027851	TCONS_00060636	1		CUFF.23934.1		u	TSS36550;
XLOC_051095	3.857133011	0.247977775	15.55434961	TCONS_00157010	1	Gm2115	ENSMUST00000180387	ENSMUST00000180387	=	TSS93612;
XLOC_058793	3.848233876	0.792909068	4.853310465	TCONS_00181495	1	Cilp	ENSMUST00000048762	ENSMUST00000048762	=	TSS107953;
XLOC_026993	3.838680481	0.616478746	6.226784795	TCONS_00080802	1		CUFF.32687.1		u	TSS48600;
XLOC_035361	3.811293416	0.911447915	4.181581147	TCONS_00107528	1	Gm37305	ENSMUST00000195714	ENSMUST00000195714	=	TSS64400;
XLOC_029847	3.804912209	0.436530542	8.716256578	TCONS_00089562	1		CUFF.36270.1		u	TSS53839;
XLOC_053772	3.802023408	0.657852435	5.779447194	TCONS_00166103	1	Gm19656	CUFF.65134.1	ENSMUST00000208543	=	TSS98838;
XLOC_010015	3.772744716	0.50075712	7.53408103	TCONS_00032144	1	Doc2b	CUFF.11820.2	ENSMUST00000021209	=	TSS18944;
XLOC_002519	3.748310559	0.800397464	4.683061511	TCONS_00008214	1	Prkag3	CUFF.1764.1	ENSMUST00000160732	o	TSS4774;
XLOC_005247	3.715726822	0.721662846	5.148840407	TCONS_00016418	1	Pah	CUFF.7886.1	ENSMUST00000020241	j	TSS9684;
XLOC_006703	3.688977268	0.437622933	8.42957942	TCONS_00021295	1	Gm33543	ENSMUST00000209662	ENSMUST00000209662	=	TSS12533;
XLOC_051840	3.678866718	0.875824055	4.200463205	TCONS_00159874	1	Gm16201	ENSMUST00000134312	ENSMUST00000134312	=	TSS95287;
XLOC_022994	3.668201614	0.777617129	4.717233553	TCONS_00068660	1	Slc12a8	ENSMUST00000121925	ENSMUST00000121925	=	TSS41317;
XLOC_037823	3.640364451	0.709631036	5.129939739	TCONS_00115549	1	Spata1	CUFF.47951.1	ENSMUST00000029839	o	TSS69039;
XLOC_052578	3.611707021	0.658340828	5.486074797	TCONS_00162273	1	Cyp2s1	CUFF.62754.2	ENSMUST00000043314	j	TSS96615;
XLOC_042939	3.605716479	0.464250419	7.766748999	TCONS_00130792	1	Gm22915	CUFF.55041.1	ENSMUST00000157615	o	TSS78359;
XLOC_028660	3.603091244	0.543984338	6.623520185	TCONS_00085107	1	Sptbn2	ENSMUST00000008991	ENSMUST00000008991	=	TSS51351;
XLOC_011730	3.598653389	0.837753931	4.295597138	TCONS_00037200	1	Coch	ENSMUST00000164782	ENSMUST00000164782	=	TSS22019;
XLOC_030193	3.596004819	0.557754484	6.447289842	TCONS_00089913	1		CUFF.38265.1		u	TSS54190;
XLOC_044042	3.591493894	0.667855924	5.377647733	TCONS_00134893	1	Shh	CUFF.53358.3	ENSMUST00000002708	j	TSS80717;
XLOC_027536	3.588517988	0.521776596	6.87749894	TCONS_00082376	1	Pmaip1	ENSMUST00000025399	ENSMUST00000025399	=	TSS49576;
XLOC_060436	3.577728919	0.488333926	7.326398454	TCONS_00188028	1	Filip1	CUFF.73723.4	ENSMUST00000093811	j	TSS111526;
XLOC_040893	3.568914601	0.464618417	7.681388572	TCONS_00124896	1	Cfap57	ENSMUST00000071972	ENSMUST00000071972	=	TSS74651;
XLOC_033448	3.567736359	0.668462158	5.337230116	TCONS_00102461	1	Pla2g4e	ENSMUST00000136845	ENSMUST00000136845	=	TSS61268;
XLOC_027817	3.564039147	0.458170618	7.778847024	TCONS_00083434	1	Apc	CUFF.34396.1	ENSMUST00000115781	x	TSS50170;
XLOC_035859	3.558172586	0.779322578	4.565725011	TCONS_00109348	1	Ppm1j	ENSMUST00000002298	ENSMUST00000002298	=	TSS65431;
XLOC_021053	3.550220863	0.450085366	7.887883352	TCONS_00062771	1	Parvb	CUFF.26393.2	ENSMUST00000023072	j	TSS37818;
XLOC_026469	3.544917307	0.673608983	5.262574275	TCONS_00080092	1	Gm10190	ENSMUST00000086549	ENSMUST00000086549	=	TSS48003;
XLOC_019266	3.524173925	0.807797638	4.362694023	TCONS_00057775	1	4930431P03Rik	ENSMUST00000228169	ENSMUST00000228169	=	TSS34696;
XLOC_033245	3.488356476	0.859257956	4.059731367	TCONS_00101780	1	Gm10800	CUFF.41512.1	ENSMUST00000099683	j	TSS60866;
XLOC_042989	3.467112855	0.610164943	5.682255094	TCONS_00130909	1	Anxa3	ENSMUST00000199330	ENSMUST00000199330	=	TSS78439;
XLOC_055393	3.466529957	0.523853623	6.617363713	TCONS_00170686	1	Zmat4	ENSMUST00000131410	ENSMUST00000131410	=	TSS101606;
XLOC_012368	3.458393797	0.602966227	5.735634343	TCONS_00039305	1	B830012L14Rik	ENSMUST00000182785	ENSMUST00000182785	=	TSS23270;
XLOC_018960	3.45600406	0.477185374	7.242476931	TCONS_00056745	1	Cfap70	CUFF.21168.3	ENSMUST00000056073	j	TSS34122;
XLOC_023792	3.454293207	0.368643871	9.37027163	TCONS_00071640	1	Tbc1d23	CUFF.29340.1	ENSMUST00000226586	j	TSS42978;
XLOC_020666	3.435138955	0.639700968	5.369913643	TCONS_00061365	1	AC138604.2	ENSMUST00000226620	ENSMUST00000226620	=	TSS37004;
XLOC_039658	3.433256177	0.692175149	4.96009743	TCONS_00120759	1	Kif17	CUFF.51905.4	ENSMUST00000105818	j	TSS72289;
XLOC_042802	3.42413062	0.733577186	4.667716891	TCONS_00130369	1	Thegl	CUFF.54665.1	ENSMUST00000117880	j	TSS78115;
XLOC_005962	3.42154752	0.696393729	4.913237124	TCONS_00018600	1	Rspo3	ENSMUST00000215256	ENSMUST00000215256	=	TSS11013;
XLOC_050108	3.413386931	0.586890941	5.816049781	TCONS_00153635	1	Gm19345	ENSMUST00000172815	ENSMUST00000172815	=	TSS91698;
XLOC_052794	3.406428527	0.539568323	6.313247798	TCONS_00163263	1	Rgs9bp	ENSMUST00000069912	ENSMUST00000069912	=	TSS97139;
XLOC_052071	3.379547816	0.719184239	4.699140541	TCONS_00160958	1	Zfp78	CUFF.62196.1	ENSMUST00000207347	x	TSS95823;
XLOC_060727	3.343063204	0.396091508	8.440128448	TCONS_00189171	1	Gm17041	ENSMUST00000163196	ENSMUST00000163196	=	TSS112139;
XLOC_059858	3.319291088	0.397850308	8.343065274	TCONS_00185808	1	Nrgn	ENSMUST00000065668	ENSMUST00000065668	=	TSS110294;
XLOC_032051	3.297855706	0.348858136	9.453285924	TCONS_00096984	1	Cebpb	ENSMUST00000070642	ENSMUST00000070642	=	TSS58216;
XLOC_014904	3.297852369	0.353412083	9.331464671	TCONS_00045411	1	Gm2762	CUFF.18698.1	ENSMUST00000202976	=	TSS27291;
XLOC_015488	3.28725157	0.608559113	5.401696396	TCONS_00047241	1	Gm33045	ENSMUST00000209229	ENSMUST00000209229	=	TSS28345;
XLOC_055219	3.273219953	0.754625459	4.337542439	TCONS_00170255	1	4931415C17Rik	ENSMUST00000068194	ENSMUST00000068194	=	TSS101330;
XLOC_033911	3.256583479	0.605342505	5.379737015	TCONS_00104350	1	Rims4	ENSMUST00000044734	ENSMUST00000044734	=	TSS62265;
XLOC_007249	3.241549375	0.571141718	5.675560496	TCONS_00022573	1		CUFF.6457.1		u	TSS13372;
XLOC_037818	3.224003791	0.671752561	4.799391887	TCONS_00115540	1	Wdr63	CUFF.47947.3	ENSMUST00000160285	j	TSS69032;
XLOC_023124	3.219504856	0.572875847	5.619899799	TCONS_00069210	1	Mir6363	CUFF.29225.1	ENSMUST00000184880	=	TSS41618;
XLOC_023035	3.205234542	0.550768976	5.819562613	TCONS_00068841	1	Hcls1	ENSMUST00000023531	ENSMUST00000023531	=	TSS41414;
XLOC_008316	3.204432949	0.727517649	4.404611975	TCONS_00025470	1	Asgr1	ENSMUST00000146411	ENSMUST00000146411	=	TSS15178;
XLOC_051954	3.200350459	0.542645188	5.897685141	TCONS_00160504	1	Shank2	CUFF.66738.1	ENSMUST00000105902	j	TSS95588;
XLOC_005983	3.199559204	0.635053753	5.038249422	TCONS_00018665	1		CUFF.6101.1		u	TSS11048;
XLOC_046154	3.19504501	0.552001769	5.788106464	TCONS_00141507	1	6530409C15Rik	CUFF.58087.1	ENSMUST00000143551	o	TSS84583;
XLOC_023788	3.187244726	0.699977035	4.553356137	TCONS_00071630	1	Lnp1	CUFF.29333.1	ENSMUST00000210579	j	TSS42971;
XLOC_055915	3.18267611	0.14066301	22.62624778	TCONS_00172489	1	Gm9655	CUFF.69108.1	ENSMUST00000211321	o	TSS102629;
XLOC_047152	3.180342034	0.584623951	5.439979027	TCONS_00144798	1	Lmcd1	CUFF.60560.1	ENSMUST00000032376	j	TSS86450;
XLOC_024871	3.166559563	0.410793573	7.708396074	TCONS_00073897	1	Msrb1	CUFF.31034.2	ENSMUST00000115262	j	TSS44571;
XLOC_025402	3.165214972	0.348038074	9.094450323	TCONS_00076071	1	Vav1	ENSMUST00000169220	ENSMUST00000169220	=	TSS45770;
XLOC_028944	3.159318996	0.709008818	4.455965731	TCONS_00086227	1	Kcnv2	ENSMUST00000056708	ENSMUST00000056708	=	TSS51969;
XLOC_033746	3.158774828	0.767160687	4.117487876	TCONS_00103693	1	Tmem74bos	CUFF.43345.1	ENSMUST00000137422	=	TSS61929;
XLOC_017598	3.147394157	0.520564653	6.046115768	TCONS_00052831	1	CT025624.2	ENSMUST00000223609	ENSMUST00000223609	=	TSS31760;
XLOC_049185	3.146463499	0.75956132	4.14247463	TCONS_00151699	1	D6Ertd474e	CUFF.61773.1	ENSMUST00000100817	x	TSS90357;
XLOC_005986	3.141936566	0.463236182	6.782580222	TCONS_00018669	1	Tpd52l1	CUFF.6113.2	ENSMUST00000213528	j	TSS11053;
XLOC_061042	3.136279992	0.595026379	5.270825129	TCONS_00190339	1		CUFF.70941.1		u	TSS112776;
XLOC_012018	3.126799537	0.752040081	4.157756506	TCONS_00038133	1	Rgs6	ENSMUST00000201602	ENSMUST00000201602	=	TSS22586;
XLOC_047846	3.117933629	0.484826226	6.431033352	TCONS_00147331	1	Tmem209	CUFF.58192.1	ENSMUST00000151187	o	TSS87853;
XLOC_045559	3.096429751	0.678006002	4.5669651	TCONS_00140598	1		CUFF.53570.1		u	TSS83862;
XLOC_013438	3.093688062	0.612092775	5.054279662	TCONS_00042416	1	Tc2n	CUFF.16876.5	ENSMUST00000160830	=	TSS25178;
XLOC_027954	3.093291786	0.751158398	4.118028627	TCONS_00083811	1	Lox	CUFF.34856.5	ENSMUST00000171470	j	TSS50409;
XLOC_049220	3.0895982	0.612382917	5.04520638	TCONS_00151858	1	Pthlh	ENSMUST00000052296	ENSMUST00000052296	=	TSS90436;
XLOC_012299	3.086782499	0.377083504	8.185938827	TCONS_00039051	1	Ak7	CUFF.17016.2	ENSMUST00000040876	j	TSS23130;
XLOC_010446	3.084938457	0.504750138	6.111813002	TCONS_00033666	1	Zfp385c	ENSMUST00000103119	ENSMUST00000103119	=	TSS19822;
XLOC_040837	3.065026425	0.707313236	4.333336732	TCONS_00124561	1	Dmbx1	ENSMUST00000064806	ENSMUST00000064806	=	TSS74472;
XLOC_044920	3.049872072	0.602872589	5.058899889	TCONS_00138063	1	Cabp1	ENSMUST00000031519	ENSMUST00000031519	=	TSS82457;
XLOC_050334	3.041187178	0.486258631	6.254258507	TCONS_00154331	1	Fbxo17	CUFF.62908.1	ENSMUST00000108278	j	TSS92118;
XLOC_009035	3.039957456	0.746623955	4.071604503	TCONS_00028348	1	Rab37	ENSMUST00000131046	ENSMUST00000131046	=	TSS16819;
XLOC_006005	3.037231823	0.688652285	4.410399688	TCONS_00018709	1	Clvs2	CUFF.6177.4	ENSMUST00000019920	j	TSS11081;
XLOC_050207	3.036695015	0.617342662	4.918978066	TCONS_00153807	1	Zfp235	ENSMUST00000205834	ENSMUST00000205834	=	TSS91816;
XLOC_058565	3.035170194	0.613722796	4.94550669	TCONS_00180588	1	2900052N01Rik	ENSMUST00000191603	ENSMUST00000191603	=	TSS107442;
XLOC_008877	3.027007115	0.548358133	5.520128053	TCONS_00027767	1	Cd300lg	ENSMUST00000123895	ENSMUST00000123895	=	TSS16486;
XLOC_026990	3.026517165	0.474532001	6.377898985	TCONS_00080799	1		CUFF.32684.1		u	TSS48597;
XLOC_025505	3.024557821	0.580210795	5.212860301	TCONS_00076486	1	Arhgef33	CUFF.33014.1	ENSMUST00000068175	j	TSS46013;
XLOC_039930	3.013602883	0.571462229	5.273494433	TCONS_00121597	1	Gm27200	ENSMUST00000184626	ENSMUST00000184626	=	TSS72792;
XLOC_019619	3.011588808	0.686950957	4.383993904	TCONS_00059160	1	Pnoc	ENSMUST00000059339	ENSMUST00000059339	=	TSS35456;
XLOC_060585	3.003891851	0.713877461	4.207853612	TCONS_00188472	1	Pls1	CUFF.74180.1	ENSMUST00000093800	j	TSS111783;
XLOC_010513	3.001240751	0.388364591	7.727894914	TCONS_00034074	1	Gfap	ENSMUST00000067444	ENSMUST00000067444	=	TSS20017;
XLOC_060099	2.994167049	0.410667938	7.290968615	TCONS_00186715	1		CUFF.72362.1		u	TSS110811;
XLOC_055077	2.989970006	0.615615118	4.856882032	TCONS_00169828	1		CUFF.66529.1		u	TSS101074;
XLOC_010494	2.986720053	0.632638312	4.721054664	TCONS_00033950	1	Slc4a1	CUFF.13303.2	ENSMUST00000006749	j	TSS19961;
XLOC_060835	2.982529621	0.443748859	6.721210802	TCONS_00189719	1	4930545L08Rik	CUFF.74947.1	ENSMUST00000215688	j	TSS112428;
XLOC_011547	2.949151437	0.448989571	6.568418569	TCONS_00036618	1	Taf1b	CUFF.14639.1	ENSMUST00000075954	j	TSS21657;
XLOC_025909	2.946654881	0.637717222	4.620629302	TCONS_00077933	1	4930539E08Rik	ENSMUST00000062357	ENSMUST00000062357	=	TSS46829;
XLOC_039061	2.944202902	0.650980946	4.522717476	TCONS_00118301	1	Acer2	ENSMUST00000045224	ENSMUST00000045224	=	TSS70877;
XLOC_062429	2.943172555	0.607675925	4.843325914	TCONS_00192940	1	Tmem28	CUFF.76775.1	ENSMUST00000096363	o	TSS114628;
XLOC_029482	2.939240926	0.494878875	5.939313793	TCONS_00088235	1	Gcnt1	CUFF.36625.1	ENSMUST00000174236	j	TSS53102;
XLOC_009207	2.938025668	0.564385857	5.205703918	TCONS_00029238	1	Cabp7	ENSMUST00000009219	ENSMUST00000009219	=	TSS17286;
XLOC_031107	2.931012019	0.218476737	13.41567096	TCONS_00093181	1	Ube2l6	ENSMUST00000102642	ENSMUST00000102642	=	TSS56092;
XLOC_016125	2.929696463	0.223508568	13.10775909	TCONS_00049018	1	AC140293.1	ENSMUST00000225626	ENSMUST00000225626	=	TSS29414;
XLOC_006462	2.928422941	0.686654868	4.264766883	TCONS_00020233	1	Shc2	CUFF.7454.2	ENSMUST00000166450	=	TSS11951;
XLOC_007853	2.917200932	0.52310978	5.576651491	TCONS_00023721	1	Stc2	CUFF.10153.1	ENSMUST00000020546	x	TSS14198;
XLOC_050289	2.916421671	0.518093189	5.629144973	TCONS_00154112	1	Cyp2t4	ENSMUST00000164093	ENSMUST00000164093	=	TSS92006;
XLOC_050508	2.914004504	0.625773722	4.656642488	TCONS_00154891	1	Cebpa	ENSMUST00000205391	ENSMUST00000205391	=	TSS92433;
XLOC_025868	2.913857763	0.587130367	4.962880353	TCONS_00077782	1	Neurl1b	CUFF.31150.1	ENSMUST00000053020	x	TSS46738;
XLOC_036285	2.903949257	0.596614924	4.86737616	TCONS_00110764	1	Gm31881	ENSMUST00000199455	ENSMUST00000199455	=	TSS66253;
XLOC_014495	2.901501803	0.468043117	6.199219042	TCONS_00044315	1	Zfp184	CUFF.17838.1	ENSMUST00000102978	o	TSS26577;
XLOC_039584	2.898566993	0.683274771	4.242168913	TCONS_00120404	1	Map3k6	ENSMUST00000030677	ENSMUST00000030677	=	TSS72102;
XLOC_062418	2.898473239	0.506756557	5.71965611	TCONS_00192908	1	Ar	ENSMUST00000052837	ENSMUST00000052837	=	TSS114606;
XLOC_025337	2.896760369	0.424430216	6.825056884	TCONS_00075847	1	Mocs1	ENSMUST00000165390	ENSMUST00000165390	=	TSS45633;
XLOC_039346	2.891161978	0.422601223	6.841347871	TCONS_00119445	1	Tctex1d4	ENSMUST00000134074	ENSMUST00000134074	=	TSS71549;
XLOC_009991	2.878702348	0.466571981	6.169899755	TCONS_00032035	1	Rap1gap2	CUFF.11712.2	ENSMUST00000047488	j	TSS18887;
XLOC_013280	2.871868085	0.697504515	4.117346946	TCONS_00041971	1	Gm10095	CUFF.16390.1	ENSMUST00000222765	o	TSS24905;
XLOC_055585	2.870132136	0.423448592	6.777994284	TCONS_00171318	1	Casp3	ENSMUST00000211115	ENSMUST00000211115	=	TSS101971;
XLOC_047410	2.862808168	0.701758898	4.079475408	TCONS_00145887	1	Gm18609	CUFF.61353.1	ENSMUST00000203370	=	TSS87041;
XLOC_027608	2.862512421	0.590409318	4.848352381	TCONS_00082707	1	4930465K10Rik	CUFF.35653.1	ENSMUST00000056675	o	TSS49772;
XLOC_059289	2.862347966	0.543742053	5.264165152	TCONS_00183392	1	4930447F24Rik	ENSMUST00000194283	ENSMUST00000194283	=	TSS109015;
XLOC_032214	2.854776907	0.260211648	10.97098048	TCONS_00097504	1	Rtel1	CUFF.44264.3	ENSMUST00000054622	j	TSS58531;
XLOC_043392	2.844809259	0.628996131	4.522777042	TCONS_00132468	1	Lrrc43	ENSMUST00000196809	ENSMUST00000196809	=	TSS79337;
XLOC_056165	2.844753577	0.371245499	7.662728803	TCONS_00173426	1	Car7	ENSMUST00000212942	ENSMUST00000212942	=	TSS103168;
XLOC_039700	2.83949916	0.662235647	4.287747376	TCONS_00120896	1	Padi2	CUFF.52002.5	ENSMUST00000030765	j	TSS72372;
XLOC_041128	2.834847551	0.420166373	6.74696438	TCONS_00125743	1	Trnp1	ENSMUST00000125541	ENSMUST00000125541	=	TSS75146;
XLOC_027494	2.833302492	0.606176012	4.674059076	TCONS_00082192	1	Camk2a	ENSMUST00000102888	ENSMUST00000102888	=	TSS49479;
XLOC_040761	2.832851234	0.703731856	4.025469658	TCONS_00124329	1	Lrp8os3	ENSMUST00000125464	ENSMUST00000125464	=	TSS74325;
XLOC_052008	2.830253422	0.213408065	13.26216709	TCONS_00160684	1	Lair1	CUFF.62058.8	ENSMUST00000206445	=	TSS95680;
XLOC_039197	2.827786051	0.552286306	5.120145151	TCONS_00118699	1	Tctex1d1	ENSMUST00000220547	ENSMUST00000220547	=	TSS71141;
XLOC_051492	2.82410814	0.682405165	4.138462433	TCONS_00158333	1	Gm45819	ENSMUST00000210940	ENSMUST00000210940	=	TSS94418;
XLOC_058845	2.821620272	0.378061814	7.463383423	TCONS_00181739	1	Myo1e	ENSMUST00000213863	ENSMUST00000213863	=	TSS108074;
XLOC_013251	2.8210467	0.184435953	15.2955357	TCONS_00041833	1	Entpd5	CUFF.16261.1	ENSMUST00000110272	j	TSS24827;
XLOC_012748	2.818358525	0.24407427	11.54713491	TCONS_00040392	1	Rnf144a	ENSMUST00000223137	ENSMUST00000223137	=	TSS23945;
XLOC_029257	2.813928509	0.529603774	5.313271256	TCONS_00087438	1	Cnih2	ENSMUST00000025805	ENSMUST00000025805	=	TSS52649;
XLOC_021698	2.810548169	0.400701853	7.014063326	TCONS_00064924	1	Gpr20	ENSMUST00000064166	ENSMUST00000064166	=	TSS39091;
XLOC_064163	2.80626987	0.280344687	10.01006976	TCONS_00197511	1	Col4a6	ENSMUST00000101205	ENSMUST00000101205	=	TSS117385;
XLOC_031935	2.804477348	0.493101814	5.687420467	TCONS_00096496	1	Slc32a1	ENSMUST00000045738	ENSMUST00000045738	=	TSS57962;
XLOC_025615	2.79219241	0.595067449	4.692228441	TCONS_00076795	1	Dynlt1a	ENSMUST00000169415	ENSMUST00000169415	=	TSS46207;
XLOC_035017	2.790007999	0.64637744	4.316375895	TCONS_00106350	1	A830092H15Rik	ENSMUST00000099182	ENSMUST00000099182	=	TSS63728;
XLOC_036953	2.788468141	0.403685881	6.907519614	TCONS_00112566	1	Tmem144	CUFF.45775.4	ENSMUST00000029568	j	TSS67329;
XLOC_060264	2.787323341	0.435773124	6.396271786	TCONS_00187442	1	Rbpms2	CUFF.73031.1	ENSMUST00000055844	x	TSS111204;
XLOC_048751	2.785277928	0.592807159	4.698455282	TCONS_00150084	1	Slc6a1	CUFF.60744.1	ENSMUST00000032454	x	TSS89487;
XLOC_023837	2.780309801	0.370132619	7.511658405	TCONS_00071768	1	Crybg3	CUFF.29380.1	ENSMUST00000044604	j	TSS43067;
XLOC_044075	2.777046648	0.49679261	5.589951608	TCONS_00135029	1	Slc30a3	ENSMUST00000031037	ENSMUST00000031037	=	TSS80781;
XLOC_031375	2.769811762	0.664960091	4.165380447	TCONS_00094136	1		CUFF.41726.1		u	TSS56667;
XLOC_016325	2.769682369	0.645068402	4.293625852	TCONS_00049832	1	AC156572.1	ENSMUST00000221040	ENSMUST00000221040	=	TSS29831;
XLOC_023737	2.768266415	0.325398208	8.507319188	TCONS_00071446	1	Plcxd2	CUFF.29155.1	ENSMUST00000130481	j	TSS42869;
XLOC_003505	2.76808858	0.216133294	12.8073215	TCONS_00011821	1	Stum	CUFF.4678.2	ENSMUST00000136521	j	TSS6777;
XLOC_026463	2.766832267	0.656580532	4.214002904	TCONS_00080060	1	Cyp1b1	CUFF.32988.2	ENSMUST00000024894	j	TSS47991;
XLOC_064378	2.762706084	0.496762985	5.561416953	TCONS_00198105	1	Frmpd4	CUFF.77811.1	ENSMUST00000112147	j	TSS117738;
XLOC_012115	2.761313721	0.650827414	4.242774136	TCONS_00038570	1		CUFF.16452.1		u	TSS22819;
XLOC_040369	2.752763661	0.562403943	4.894637913	TCONS_00123110	1	Klf4	CUFF.49390.2	ENSMUST00000107619	j	TSS73616;
XLOC_006427	2.752164386	0.586617096	4.691585712	TCONS_00020061	1	Trpm2	CUFF.7392.2	ENSMUST00000140471	=	TSS11866;
XLOC_026350	2.751918491	0.447654878	6.147410938	TCONS_00079726	1	Cntnap5c	CUFF.32448.1	ENSMUST00000076038	x	TSS47777;
XLOC_023567	2.751883746	0.581373449	4.733418339	TCONS_00070832	1	Masp1	ENSMUST00000089883	ENSMUST00000089883	=	TSS42530;
XLOC_019666	2.751535705	0.33183511	8.291876353	TCONS_00059277	1	Gm16867	ENSMUST00000183917	ENSMUST00000183917	=	TSS35532;
XLOC_011523	2.746710483	0.384612249	7.14150548	TCONS_00036547	1	AC164424.2	CUFF.14563.3	ENSMUST00000222348	=	TSS21617;
XLOC_040801	2.746523384	0.618630878	4.439680403	TCONS_00124491	1	Agbl4	CUFF.50780.1	ENSMUST00000106592	x	TSS74422;
XLOC_052348	2.744754352	0.611839262	4.486070971	TCONS_00161603	1	Dact3	CUFF.62443.1	ENSMUST00000108493	x	TSS96225;
XLOC_043910	2.743043941	0.236072572	11.61949443	TCONS_00134452	1	Gm21149	ENSMUST00000197995	ENSMUST00000197995	=	TSS80452;
XLOC_051880	2.73999546	0.595330022	4.602481579	TCONS_00160074	1	Pkp3	ENSMUST00000106039	ENSMUST00000106039	=	TSS95377;
XLOC_062689	2.734010755	0.596106956	4.586443305	TCONS_00193524	1	Srpx2	ENSMUST00000033606	ENSMUST00000033606	=	TSS115004;
XLOC_043289	2.73337032	0.3560162	7.677657143	TCONS_00132014	1	Gm15728	ENSMUST00000140833	ENSMUST00000140833	=	TSS79072;
XLOC_008438	2.731010181	0.368928819	7.402539565	TCONS_00026032	1	Gm12339	ENSMUST00000127424	ENSMUST00000127424	=	TSS15471;
XLOC_008907	2.730158317	0.479041867	5.699206076	TCONS_00027915	1	Arhgap27os1	ENSMUST00000130556	ENSMUST00000130556	=	TSS16562;
XLOC_027153	2.722929838	0.582612465	4.673655306	TCONS_00081056	1	Ccny	CUFF.33811.1	ENSMUST00000053917	x	TSS48800;
XLOC_018906	2.717290692	0.641323274	4.237006206	TCONS_00056592	1	Lrrc3b	CUFF.21031.3	ENSMUST00000055211	j	TSS34026;
XLOC_048672	2.715496229	0.455480929	5.961822017	TCONS_00149852	1	Pdzrn3	CUFF.60435.3	ENSMUST00000075994	j	TSS89346;
XLOC_001185	2.714547419	0.542188061	5.00665288	TCONS_00003903	1	Etnk2	ENSMUST00000135222	ENSMUST00000135222	=	TSS2241;
XLOC_047284	2.70785129	0.618823453	4.375805859	TCONS_00145397	1	Pex26	ENSMUST00000118234	ENSMUST00000118234	=	TSS86776;
XLOC_028117	2.702705235	0.64068606	4.218454875	TCONS_00084338	1	Slc14a2	ENSMUST00000025434	ENSMUST00000025434	=	TSS50713;
XLOC_043777	2.695720781	0.299494404	9.000905354	TCONS_00134009	1	Gm20488	CUFF.57462.1	ENSMUST00000201641	j	TSS80203;
XLOC_059307	2.689028429	0.307800796	8.736262111	TCONS_00183557	1	4833445I07Rik	CUFF.74745.1	ENSMUST00000194104	=	TSS109081;
XLOC_063276	2.682311927	0.57988767	4.625571584	TCONS_00195174	1	Gm7391	CUFF.75812.1	ENSMUST00000178680	x	TSS115992;
XLOC_030985	2.678970138	0.592085655	4.524632737	TCONS_00092851	1	Map3k20	ENSMUST00000090824	ENSMUST00000090824	=	TSS55879;
XLOC_012558	2.678136639	0.559820461	4.783920607	TCONS_00040006	1	Slc7a15	CUFF.14387.1	ENSMUST00000036938	o	TSS23687;
XLOC_055882	2.676964052	0.478166667	5.598391183	TCONS_00172362	1	Ttc29	ENSMUST00000117845	ENSMUST00000117845	=	TSS102557;
XLOC_028783	2.674976197	0.353400299	7.569252793	TCONS_00085681	1	Syt7	CUFF.36430.1	ENSMUST00000073899	=	TSS51645;
XLOC_031809	2.666205292	0.347198536	7.67919509	TCONS_00095895	1	Srxn1	ENSMUST00000137751	ENSMUST00000137751	=	TSS57665;
XLOC_025869	2.66526901	0.625518203	4.260897599	TCONS_00077783	1	Dusp1	CUFF.31151.2	ENSMUST00000025025	j	TSS46739;
XLOC_039353	2.664713816	0.357705488	7.449463042	TCONS_00119462	1	Gm12843	CUFF.50958.1	ENSMUST00000137607	o	TSS71560;
XLOC_041415	2.658837738	0.403033987	6.597055893	TCONS_00126857	1	Kcnab2	CUFF.52450.2	ENSMUST00000159186	j	TSS75791;
XLOC_058627	2.651746422	0.499124987	5.312790369	TCONS_00180831	1	Npat	ENSMUST00000035850	ENSMUST00000035850	=	TSS107576;
XLOC_031849	2.640297293	0.622708772	4.240019433	TCONS_00096076	1	Mapre1	ENSMUST00000028981	ENSMUST00000028981	=	TSS57754;
XLOC_000749	2.629115248	0.543265931	4.839462775	TCONS_00002475	1	Gm28100	CUFF.2035.1	ENSMUST00000186560	x	TSS1413;
XLOC_043290	2.629013176	0.568768543	4.622290048	TCONS_00132016	1	Ksr2	CUFF.56007.1	ENSMUST00000180430	j	TSS79073;
XLOC_005830	2.626395674	0.43058741	6.099564482	TCONS_00018217	1	Gm28289	ENSMUST00000189331	ENSMUST00000189331	=	TSS10780;
XLOC_002534	2.622793003	0.447624794	5.859355961	TCONS_00008314	1	A630095N17Rik	ENSMUST00000179573	ENSMUST00000179573	=	TSS4819;
XLOC_027036	2.619061768	0.563354678	4.649045919	TCONS_00080845	1		CUFF.32930.1		u	TSS48643;
XLOC_001349	2.616329757	0.624795475	4.187497929	TCONS_00004416	1	Rgs8	ENSMUST00000041776	ENSMUST00000041776	=	TSS2547;
XLOC_044807	2.611115732	0.323667113	8.06728775	TCONS_00137521	1	Cplx1	CUFF.55472.2	ENSMUST00000046892	j	TSS82177;
XLOC_057794	2.608884205	0.536068239	4.866701688	TCONS_00178522	1		CUFF.69094.1		u	TSS106089;
XLOC_041943	2.606375867	0.562078602	4.637030941	TCONS_00127667	1		CUFF.51922.1		u	TSS76433;
XLOC_032493	2.605894121	0.523291344	4.979815074	TCONS_00098853	1	Gm13373	CUFF.39199.1	ENSMUST00000144634	j	TSS59236;
XLOC_019565	2.598371361	0.616612168	4.213947589	TCONS_00058967	1	Sgcg	ENSMUST00000077954	ENSMUST00000077954	=	TSS35352;
XLOC_007577	2.595341584	0.533827167	4.86176378	TCONS_00022908	1		CUFF.8924.1		u	TSS13707;
XLOC_023794	2.594078507	0.127686405	20.31601177	TCONS_00071655	1	Cmss1	CUFF.29341.3	ENSMUST00000114371	j	TSS42986;
XLOC_033512	2.587942376	0.495468225	5.223225717	TCONS_00102830	1	Hdc	CUFF.42430.3	ENSMUST00000124396	=	TSS61446;
XLOC_034129	2.586335729	0.386485501	6.691934679	TCONS_00105172	1	Eef1a2	CUFF.44239.2	ENSMUST00000055990	j	TSS62721;
XLOC_047193	2.584447643	0.4462212	5.791853103	TCONS_00145001	1	Gm15083	CUFF.60732.1	ENSMUST00000138670	j	TSS86562;
XLOC_054068	2.581438829	0.413701569	6.239857478	TCONS_00167085	1	Nrip3	ENSMUST00000041460	ENSMUST00000041460	=	TSS99423;
XLOC_010103	2.575845087	0.377868115	6.81678339	TCONS_00032471	1	Cct6b	CUFF.12191.2	ENSMUST00000100722	o	TSS19134;
XLOC_041195	2.568719577	0.385643028	6.660873891	TCONS_00125987	1	C1qc	ENSMUST00000046332	ENSMUST00000046332	=	TSS75300;
XLOC_061289	2.567848366	0.210708841	12.18671391	TCONS_00190586	1		CUFF.73131.1		u	TSS113023;
XLOC_055771	2.56250315	0.391995297	6.537076261	TCONS_00171882	1	Homer3	ENSMUST00000087467	ENSMUST00000087467	=	TSS102299;
XLOC_023993	2.554336407	0.469522012	5.44029107	TCONS_00072293	1	Cldn14	ENSMUST00000177648	ENSMUST00000177648	=	TSS43388;
XLOC_047698	2.553668436	0.407640925	6.264504561	TCONS_00146824	1	Pdk4	ENSMUST00000019721	ENSMUST00000019721	=	TSS87576;
XLOC_045399	2.55087199	0.531791355	4.796753397	TCONS_00140276	1	Flt1	CUFF.57362.1	ENSMUST00000031653	j	TSS83635;
XLOC_021233	2.549420738	0.534853211	4.766580221	TCONS_00063443	1	Igfbp6	CUFF.27144.1	ENSMUST00000023807	j	TSS38215;
XLOC_039577	2.546548222	0.331680728	7.677709331	TCONS_00120375	1	Gm13033	ENSMUST00000117591	ENSMUST00000117591	=	TSS72080;
XLOC_005454	2.545773108	0.449318912	5.665848998	TCONS_00017052	1	Csrp2	ENSMUST00000020403	ENSMUST00000020403	=	TSS10079;
XLOC_055252	2.545510203	0.628731304	4.048645561	TCONS_00170428	1	Cln8	ENSMUST00000132001	ENSMUST00000132001	=	TSS101420;
XLOC_037971	2.539926432	0.629944176	4.031986533	TCONS_00115982	1		CUFF.44779.1		u	TSS69302;
XLOC_048836	2.537628582	0.527083093	4.814475391	TCONS_00150551	1	Iqsec3	CUFF.61122.4	ENSMUST00000129815	j	TSS89715;
XLOC_058612	2.533946343	0.553813869	4.575447612	TCONS_00180796	1		CUFF.72373.1		u	TSS107553;
XLOC_053756	2.532755423	0.37021326	6.841341734	TCONS_00166009	1	Aqp11	ENSMUST00000206389	ENSMUST00000206389	=	TSS98790;
XLOC_018403	2.52827527	0.500472387	5.051777752	TCONS_00055313	1	Nefl	CUFF.22843.1	ENSMUST00000022639	j	TSS33215;
XLOC_033252	2.523720256	0.505317067	4.994330138	TCONS_00101807	1	Prr5l	CUFF.41526.3	ENSMUST00000043845	=	TSS60879;
XLOC_009895	2.521721296	0.583874529	4.318943835	TCONS_00031721	1	Alox15	ENSMUST00000019068	ENSMUST00000019068	=	TSS18707;
XLOC_040079	2.516290887	0.550362335	4.572062306	TCONS_00122118	1	Gm11868	CUFF.48523.1	ENSMUST00000121594	o	TSS73068;
XLOC_047169	2.516281245	0.531953042	4.730269494	TCONS_00144864	1	Cpne9	CUFF.60632.1	ENSMUST00000041203	j	TSS86492;
XLOC_043297	2.515843031	0.356277696	7.061466542	TCONS_00132061	1	Hrk	ENSMUST00000184679	ENSMUST00000184679	=	TSS79098;
XLOC_043007	2.513573977	0.626081801	4.014769271	TCONS_00130955	1	1700007G11Rik	CUFF.55146.3	ENSMUST00000197812	=	TSS78473;
XLOC_021798	2.511584623	0.436724103	5.750964069	TCONS_00065349	1	Cacng2	ENSMUST00000019290	ENSMUST00000019290	=	TSS39312;
XLOC_008692	2.510933397	0.515757744	4.868435665	TCONS_00027082	1	Dlx4os	CUFF.12837.1	ENSMUST00000156477	j	TSS16070;
XLOC_023001	2.508808794	0.504825031	4.969660064	TCONS_00068711	1	Mylk	ENSMUST00000155268	ENSMUST00000155268	=	TSS41338;
XLOC_029509	2.504034845	0.517305015	4.840538511	TCONS_00088324	1	1700028P14Rik	CUFF.36796.1	ENSMUST00000035849	j	TSS53154;
XLOC_056117	2.501383359	0.344778343	7.255047799	TCONS_00173301	1	Ndrg4	ENSMUST00000160964	ENSMUST00000160964	=	TSS103090;
XLOC_011033	2.500531618	0.391461653	6.387679602	TCONS_00035662	1		CUFF.11012.1		u	TSS20972;
XLOC_010340	2.494928961	0.508138544	4.909938418	TCONS_00033367	1	Stac2	CUFF.13042.3	ENSMUST00000017544	j	TSS19643;
XLOC_027670	2.492724745	0.582240929	4.281259905	TCONS_00082956	1	Jcad	CUFF.33651.2	ENSMUST00000037029	x	TSS49896;
XLOC_027498	2.490884593	0.528422168	4.713815475	TCONS_00082210	1	Csf1r	ENSMUST00000025523	ENSMUST00000025523	=	TSS49488;
XLOC_022037	2.486409673	0.342588357	7.257717959	TCONS_00066366	1	Rnd1	ENSMUST00000109149	ENSMUST00000109149	=	TSS39862;
XLOC_016235	2.485690168	0.549719458	4.521743104	TCONS_00049437	1	Cxcl14	CUFF.18882.1	ENSMUST00000021970	j	TSS29634;
XLOC_031734	2.477199668	0.439265536	5.639412762	TCONS_00095665	1	Rin2	ENSMUST00000142847	ENSMUST00000142847	=	TSS57518;
XLOC_039921	2.474731951	0.608267326	4.068493977	TCONS_00121539	1	Ttc34	CUFF.52498.3	ENSMUST00000207854	j	TSS72768;
XLOC_057438	2.472362018	0.600513983	4.117076519	TCONS_00177919	1	Mtss1l	CUFF.70168.1	ENSMUST00000052457	x	TSS105638;
XLOC_038446	2.467578539	0.444732245	5.548458801	TCONS_00116536	1	Gm11800	CUFF.48259.1	ENSMUST00000120050	o	TSS69807;
XLOC_028996	2.467531599	0.419212545	5.886111071	TCONS_00086374	1	Ifit2	CUFF.37234.1	ENSMUST00000149829	=	TSS52062;
XLOC_046565	2.459856384	0.394631264	6.233303366	TCONS_00142926	1	Ccdc129	CUFF.59118.1	ENSMUST00000044729	o	TSS85374;
XLOC_054070	2.452053632	0.610778888	4.014633901	TCONS_00167090	1	Scube2	CUFF.65521.4	ENSMUST00000007423	j	TSS99426;
XLOC_053473	2.445565978	0.440920271	5.546503848	TCONS_00165039	1	Gm34783	CUFF.64369.1	ENSMUST00000209159	o	TSS98233;
XLOC_021439	2.444587559	0.381527733	6.407365307	TCONS_00064033	1	Ankrd33b	CUFF.24641.5	ENSMUST00000156679	j	TSS38572;
XLOC_063125	2.440050703	0.572044962	4.265487621	TCONS_00194816	1	Tbc1d25	CUFF.75560.1	ENSMUST00000172020	=	TSS115774;
XLOC_028926	2.437542303	0.416999307	5.845434906	TCONS_00086122	1	Tmem252	CUFF.36837.1	ENSMUST00000057243	=	TSS51914;
XLOC_048475	2.437238458	0.522764327	4.66221265	TCONS_00149076	1	1700124L16Rik	ENSMUST00000189129	ENSMUST00000189129	=	TSS88932;
XLOC_011940	2.43381448	0.446207386	5.454446872	TCONS_00037797	1	Rhoj	ENSMUST00000118602	ENSMUST00000118602	=	TSS22375;
XLOC_021751	2.43104062	0.528512543	4.599778473	TCONS_00065076	1	Scrib	CUFF.25690.1	ENSMUST00000002603	o	TSS39175;
XLOC_040993	2.428245592	0.488224456	4.973625478	TCONS_00125189	1	Cdca8	ENSMUST00000084296	ENSMUST00000084296	=	TSS74843;
XLOC_010135	2.427482692	0.563022082	4.311523066	TCONS_00032581	1	Ccl6	ENSMUST00000019071	ENSMUST00000019071	=	TSS19186;
XLOC_062413	2.419312398	0.321096641	7.534530393	TCONS_00192898	1	Gpr165	ENSMUST00000139205	ENSMUST00000139205	=	TSS114600;
XLOC_044155	2.415161359	0.52712935	4.58172431	TCONS_00135440	1	Tada2b	ENSMUST00000031097	ENSMUST00000031097	=	TSS80991;
XLOC_047287	2.414728128	0.564076278	4.280853888	TCONS_00145417	1	Slc6a13	ENSMUST00000064580	ENSMUST00000064580	=	TSS86785;
XLOC_032268	2.414606483	0.584429742	4.131559895	TCONS_00097801	1	Proser2	ENSMUST00000114942	ENSMUST00000114942	=	TSS58689;
XLOC_002536	2.412321319	0.425840227	5.66485073	TCONS_00008319	1	Ptprn	CUFF.1814.2	ENSMUST00000027404	j	TSS4822;
XLOC_015952	2.410915452	0.578862264	4.164920743	TCONS_00048510	1	Serpinb1c	ENSMUST00000021834	ENSMUST00000021834	=	TSS29104;
XLOC_002607	2.407723653	0.480757995	5.008182237	TCONS_00008550	1	Sphkap	CUFF.1956.3	ENSMUST00000160953	j	TSS4955;
XLOC_015709	2.406677142	0.586831033	4.101141565	TCONS_00047932	1	AC173210.1	ENSMUST00000222341	ENSMUST00000222341	=	TSS28735;
XLOC_062519	2.406028031	0.570840624	4.214885785	TCONS_00193187	1	Uprt	CUFF.76967.1	ENSMUST00000087867	j	TSS114783;
XLOC_058543	2.405145872	0.314678793	7.643177509	TCONS_00180474	1	Fxyd2	ENSMUST00000214680	ENSMUST00000214680	=	TSS107378;
XLOC_010109	2.404902172	0.511840664	4.698536755	TCONS_00032507	1	Nle1	CUFF.12207.3	ENSMUST00000103213	j	TSS19145;
XLOC_029434	2.403170061	0.350190442	6.862466165	TCONS_00088096	1	Dtx4	CUFF.36514.2	ENSMUST00000045521	j	TSS53011;
XLOC_032447	2.402083748	0.520869286	4.611682459	TCONS_00098575	1	A230005M16Rik	CUFF.39065.2	ENSMUST00000151069	=	TSS59085;
XLOC_051772	2.400625963	0.292803311	8.198766446	TCONS_00159641	1	Lhpp	ENSMUST00000148669	ENSMUST00000148669	=	TSS95157;
XLOC_039540	2.400269149	0.512873241	4.680043636	TCONS_00120228	1	Fabp3	ENSMUST00000070532	ENSMUST00000070532	=	TSS71999;
XLOC_031568	2.397148004	0.566307269	4.232945848	TCONS_00095025	1	Adra2b	ENSMUST00000104934	ENSMUST00000104934	=	TSS57151;
XLOC_056073	2.395859152	0.452248318	5.297662933	TCONS_00173080	1	Mt1	CUFF.69646.1	ENSMUST00000034215	j	TSS102972;
XLOC_043321	2.392259685	0.494948918	4.833346627	TCONS_00132123	1	Lhx5	ENSMUST00000031591	ENSMUST00000031591	=	TSS79141;
XLOC_040717	2.385781076	0.326864833	7.298983658	TCONS_00124174	1	Wdr78	CUFF.50486.4	ENSMUST00000152647	=	TSS74227;
XLOC_029106	2.384535209	0.435362886	5.477121006	TCONS_00086791	1	Hps6	ENSMUST00000099393	ENSMUST00000099393	=	TSS52306;
XLOC_002774	2.383445706	0.52703173	4.522395088	TCONS_00009083	1	D1Ertd622e	CUFF.2410.3	ENSMUST00000153115	=	TSS5262;
XLOC_005051	2.383185486	0.454688381	5.241359986	TCONS_00015566	1	Slc1a6	ENSMUST00000005490	ENSMUST00000005490	=	TSS9196;
XLOC_004425	2.382703935	0.338436568	7.040326495	TCONS_00013412	1	Plagl1	ENSMUST00000193426	ENSMUST00000193426	=	TSS7958;
XLOC_055442	2.382205818	0.451805624	5.272634274	TCONS_00170889	1	Adgra2	CUFF.67624.1	ENSMUST00000033876	j	TSS101717;
XLOC_000642	2.372673515	0.390058298	6.082868968	TCONS_00002059	1	Cdk5r2	ENSMUST00000160379	ENSMUST00000160379	=	TSS1197;
XLOC_025973	2.372154716	0.397894838	5.961762989	TCONS_00078202	1	Zfp422-ps	CUFF.31494.1	ENSMUST00000182230	o	TSS46978;
XLOC_014116	2.36759689	0.55553582	4.2618258	TCONS_00043629	1		CUFF.15812.1		u	TSS26071;
XLOC_026262	2.358339625	0.513204724	4.595319399	TCONS_00079447	1	Tspo2	CUFF.32200.2	ENSMUST00000024794	j	TSS47606;
XLOC_028673	2.34992155	0.320430373	7.333641703	TCONS_00085153	1	Gal3st3	CUFF.36112.1	ENSMUST00000061169	j	TSS51370;
XLOC_058459	2.349337209	0.536731471	4.377118421	TCONS_00180119	1	Clmp	ENSMUST00000139577	ENSMUST00000139577	=	TSS107164;
XLOC_057223	2.341530106	0.466482066	5.019550108	TCONS_00177112	1	Gm19935	ENSMUST00000209208	ENSMUST00000209208	=	TSS105203;
XLOC_054240	2.339750561	0.512227543	4.567795295	TCONS_00167815	1	Atp2a1	ENSMUST00000032974	ENSMUST00000032974	=	TSS99804;
XLOC_052612	2.339718308	0.345536561	6.771261203	TCONS_00162427	1	Zfp780b	ENSMUST00000205874	ENSMUST00000205874	=	TSS96695;
XLOC_015271	2.333801762	0.33269274	7.01488635	TCONS_00046575	1	Lysmd3	ENSMUST00000224300	ENSMUST00000224300	=	TSS27957;
XLOC_008048	2.331286506	0.507514807	4.59353397	TCONS_00024388	1	Fstl4	CUFF.10727.1	ENSMUST00000036796	j	TSS14597;
XLOC_053717	2.330933146	0.459475772	5.073027321	TCONS_00165903	1	Dlg2	CUFF.64919.1	ENSMUST00000107196	x	TSS98731;
XLOC_036522	2.327349761	0.37860476	6.147175119	TCONS_00111453	1	1600017P15Rik	CUFF.44847.1	ENSMUST00000193960	o	TSS66636;
XLOC_054887	2.326028642	0.508529239	4.574031275	TCONS_00169634	1		CUFF.64640.1		u	TSS100880;
XLOC_001215	2.325676065	0.365430717	6.364205193	TCONS_00003994	1	Ube2t	CUFF.3182.2	ENSMUST00000027687	j	TSS2291;
XLOC_025328	2.325646127	0.539777053	4.308530924	TCONS_00075814	1	Trem2	CUFF.32192.1	ENSMUST00000024791	j	TSS45623;
XLOC_057337	2.322917694	0.464656006	4.999220203	TCONS_00177519	1	Gm45892	ENSMUST00000212627	ENSMUST00000212627	=	TSS105428;
XLOC_030965	2.32163992	0.424933963	5.463531095	TCONS_00092731	1	Gad1	ENSMUST00000130618	ENSMUST00000130618	=	TSS55813;
XLOC_010457	2.316257401	0.408971769	5.663611963	TCONS_00033724	1	Cavin1	ENSMUST00000060792	ENSMUST00000060792	=	TSS19854;
XLOC_055662	2.312765735	0.335405717	6.895427284	TCONS_00171486	1	Scrg1	ENSMUST00000034023	ENSMUST00000034023	=	TSS102089;
XLOC_043409	2.298573331	0.457995613	5.018767137	TCONS_00132543	1	2810006K23Rik	ENSMUST00000111477	ENSMUST00000111477	=	TSS79381;
XLOC_016713	2.293369685	0.557088586	4.11670557	TCONS_00051100	1	Naip2	CUFF.20033.2	ENSMUST00000117913	j	TSS30576;
XLOC_046022	2.286272108	0.305810654	7.476103533	TCONS_00141097	1	Peg10	ENSMUST00000166678	ENSMUST00000176204	=	TSS84346;
XLOC_006604	2.286175701	0.466310782	4.902686773	TCONS_00020880	1	Fabp3-ps1	ENSMUST00000070435	ENSMUST00000070435	=	TSS12300;
XLOC_013969	2.282746958	0.566276055	4.031155722	TCONS_00043480	1		CUFF.14677.1		u	TSS25922;
XLOC_002492	2.282294973	0.435136183	5.245013087	TCONS_00008082	1	4-Mar	ENSMUST00000047786	ENSMUST00000047786	=	TSS4709;
XLOC_010370	2.281586574	0.529337606	4.310267303	TCONS_00033494	1	Krt25	ENSMUST00000038004	ENSMUST00000038004	=	TSS19710;
XLOC_009862	2.274529867	0.38251401	5.946265518	TCONS_00031524	1	Cd68	ENSMUST00000018918	ENSMUST00000018918	=	TSS18612;
XLOC_016231	2.270222976	0.362546743	6.261876631	TCONS_00049430	1	Tifab	CUFF.18881.2	ENSMUST00000225063	=	TSS29630;
XLOC_029006	2.27019921	0.488105233	4.651044608	TCONS_00086405	1	Rpp30	ENSMUST00000025714	ENSMUST00000025714	=	TSS52079;
XLOC_031937	2.268266274	0.335130857	6.76830028	TCONS_00096504	1	Ppp1r16b	ENSMUST00000129902	ENSMUST00000129902	=	TSS57966;
XLOC_015699	2.263906971	0.309723048	7.309455936	TCONS_00047901	1	Hecw1	CUFF.17695.5	ENSMUST00000110516	j	TSS28719;
XLOC_025632	2.262593273	0.308283602	7.33932412	TCONS_00076832	1	Gm1604a	CUFF.30345.1	ENSMUST00000097422	j	TSS46232;
XLOC_042995	2.261875167	0.463349325	4.881576478	TCONS_00130932	1	Bmp2k	ENSMUST00000112974	ENSMUST00000112974	=	TSS78457;
XLOC_057499	2.261254572	0.54382809	4.158031947	TCONS_00178124	1		CUFF.70426.1		u	TSS105746;
XLOC_048828	2.258541915	0.393889551	5.733947275	TCONS_00150502	1	Bid	ENSMUST00000160684	ENSMUST00000160684	=	TSS89691;
XLOC_000981	2.257415968	0.249575294	9.045029781	TCONS_00003290	1	D630008O14Rik	CUFF.2571.1	ENSMUST00000149909	o	TSS1865;
XLOC_007759	2.253665196	0.221532215	10.17308113	TCONS_00023442	1	Aftph	CUFF.9743.1	ENSMUST00000035350	x	TSS14021;
XLOC_006660	2.244757124	0.50555005	4.44022728	TCONS_00021136	1	Cfap54	CUFF.8141.3	ENSMUST00000212902	j	TSS12435;
XLOC_032100	2.243789436	0.538037862	4.170318846	TCONS_00097116	1	Rbm38	ENSMUST00000173393	ENSMUST00000173393	=	TSS58309;
XLOC_013216	2.238792488	0.455827271	4.911493086	TCONS_00041739	1	Map3k9	CUFF.16067.3	ENSMUST00000222322	j	TSS24764;
XLOC_009135	2.238263372	0.516965967	4.329614545	TCONS_00028867	1	0610009L18Rik	ENSMUST00000143813	ENSMUST00000143813	=	TSS17108;
XLOC_019761	2.237742674	0.348543396	6.420269895	TCONS_00059601	1	Dgkh	CUFF.23185.8	ENSMUST00000228362	=	TSS35730;
XLOC_045402	2.231846151	0.521533317	4.279393244	TCONS_00140292	1	Gm15721	ENSMUST00000138406	ENSMUST00000138406	=	TSS83645;
XLOC_036541	2.230884203	0.482770295	4.621005531	TCONS_00111520	1	Pex5l	CUFF.44919.1	ENSMUST00000193681	j	TSS66667;
XLOC_056005	2.228298763	0.291708067	7.638797181	TCONS_00172844	1	Gm10638	ENSMUST00000098532	ENSMUST00000098532	=	TSS102830;
XLOC_021054	2.227363811	0.451951583	4.928323949	TCONS_00062777	1	Parvg	ENSMUST00000127551	ENSMUST00000127551	=	TSS37821;
XLOC_012451	2.227083865	0.425795497	5.230407272	TCONS_00039649	1	BC022687	ENSMUST00000037014	ENSMUST00000037014	=	TSS23477;
XLOC_040308	2.223071167	0.492024705	4.518210459	TCONS_00122937	1	Gm12446	CUFF.49193.2	ENSMUST00000123933	j	TSS73502;
XLOC_058631	2.216284169	0.524414713	4.226205163	TCONS_00180838	1	Slc35f2	CUFF.72430.2	ENSMUST00000048670	j	TSS107581;
XLOC_030984	2.214466584	0.517208253	4.281576272	TCONS_00092837	1	Rapgef4	ENSMUST00000090826	ENSMUST00000090826	=	TSS55871;
XLOC_027845	2.213454659	0.552673956	4.004991797	TCONS_00083526	1	Pfdn1	CUFF.34503.1	ENSMUST00000025204	o	TSS50221;
XLOC_051648	2.210977825	0.517168928	4.275155963	TCONS_00158976	1	Sbk1	ENSMUST00000056028	ENSMUST00000056028	=	TSS94798;
XLOC_048642	2.20993363	0.320193723	6.901864303	TCONS_00149736	1	Frmd4b	CUFF.60300.2	ENSMUST00000113355	j	TSS89281;
XLOC_060115	2.209154709	0.419600029	5.264905998	TCONS_00186778	1	Rab39	ENSMUST00000068449	ENSMUST00000068449	=	TSS110849;
XLOC_027538	2.208666297	0.438716524	5.034381373	TCONS_00082379	1	Gnal	ENSMUST00000025402	ENSMUST00000025402	=	TSS49579;
XLOC_037425	2.199260179	0.479797581	4.583725023	TCONS_00114236	1	Pifo	CUFF.46927.1	ENSMUST00000010280	j	TSS68267;
XLOC_031813	2.191170185	0.273450497	8.013041522	TCONS_00095909	1	Tbc1d20	CUFF.43380.1	ENSMUST00000028963	j	TSS57672;
XLOC_051174	2.190597567	0.350732016	6.245787286	TCONS_00157239	1	Dlg2	ENSMUST00000107196	ENSMUST00000107196	=	TSS93742;
XLOC_004988	2.188965027	0.429619478	5.095125195	TCONS_00015328	1	Ggt5	CUFF.7281.4	ENSMUST00000072217	j	TSS9059;
XLOC_051720	2.187995949	0.54492441	4.015228364	TCONS_00159403	1	Tgfb1i1	ENSMUST00000164710	ENSMUST00000164710	=	TSS95034;
XLOC_040965	2.185896937	0.387011618	5.648142945	TCONS_00125114	1	Macf1	CUFF.51207.1	ENSMUST00000097897	o	TSS74789;
XLOC_046272	2.183393645	0.517699359	4.217493427	TCONS_00142042	1	Clec2l	ENSMUST00000114874	ENSMUST00000114874	=	TSS84856;
XLOC_001434	2.18082433	0.231824274	9.407230269	TCONS_00004711	1	Ankrd45	CUFF.3839.1	ENSMUST00000111608	j	TSS2723;
XLOC_058909	2.178364553	0.262432738	8.300658572	TCONS_00181971	1	Myo5a	ENSMUST00000149823	ENSMUST00000149823	=	TSS108207;
XLOC_021551	2.177569405	0.517970332	4.204042719	TCONS_00064392	1	AC099629.1	CUFF.25036.2	ENSMUST00000226778	x	TSS38800;
XLOC_035676	2.176760663	0.532773031	4.085718566	TCONS_00108593	1	Celf3	ENSMUST00000199884	ENSMUST00000199884	=	TSS65027;
XLOC_040004	2.175307598	0.483592924	4.498220484	TCONS_00121907	1	Car8	CUFF.48258.1	ENSMUST00000066674	j	TSS72949;
XLOC_015771	2.173520917	0.509997074	4.261830167	TCONS_00048104	1	Olfr1366	ENSMUST00000205976	ENSMUST00000205976	=	TSS28832;
XLOC_043680	2.165545621	0.43789605	4.945341754	TCONS_00133630	1	Grid2ip	ENSMUST00000110733	ENSMUST00000110733	=	TSS79981;
XLOC_062124	2.162227024	0.454664487	4.755654085	TCONS_00192125	1		CUFF.76177.1		u	TSS114149;
XLOC_032791	2.161712775	0.407836839	5.300435293	TCONS_00100236	1	Grb14	ENSMUST00000134020	ENSMUST00000134020	=	TSS59943;
XLOC_029632	2.158240828	0.492744521	4.380040241	TCONS_00088832	1	Opalin	ENSMUST00000087176	ENSMUST00000087176	=	TSS53434;
XLOC_018634	2.147750227	0.411199281	5.223137119	TCONS_00055945	1	Cln5	ENSMUST00000022721	ENSMUST00000022721	=	TSS33609;
XLOC_050208	2.14732283	0.447077009	4.803026745	TCONS_00153815	1	Zfp114	CUFF.62620.1	ENSMUST00000206547	=	TSS91817;
XLOC_045069	2.145615895	0.347752032	6.169959336	TCONS_00138814	1	Rilpl2	ENSMUST00000031347	ENSMUST00000031347	=	TSS82859;
XLOC_041045	2.140822724	0.493288938	4.33989607	TCONS_00125387	1	Hpca	ENSMUST00000095807	ENSMUST00000095807	=	TSS74953;
XLOC_026595	2.138173702	0.493056652	4.336568006	TCONS_00080397	1		CUFF.30255.1		u	TSS48195;
XLOC_007955	2.13593359	0.244222732	8.745842659	TCONS_00023996	1	Havcr2	CUFF.10497.1	ENSMUST00000109229	o	TSS14380;
XLOC_025030	2.135833849	0.254492501	8.392521736	TCONS_00074616	1	Myo1f	ENSMUST00000087605	ENSMUST00000087605	=	TSS44940;
XLOC_008266	2.135619079	0.41137713	5.1913899	TCONS_00025189	1	Ccdc42	ENSMUST00000154294	ENSMUST00000154294	=	TSS15021;
XLOC_027542	2.134163846	0.430245152	4.960343738	TCONS_00082392	1	Tubb6	ENSMUST00000001513	ENSMUST00000001513	=	TSS49590;
XLOC_023985	2.12630015	0.151573658	14.02816412	TCONS_00072254	1	Rcan1	ENSMUST00000023672	ENSMUST00000023672	=	TSS43362;
XLOC_033884	2.126067921	0.501063348	4.243112033	TCONS_00104256	1	Mafb	ENSMUST00000099126	ENSMUST00000099126	=	TSS62213;
XLOC_037454	2.122567461	0.504673005	4.205827216	TCONS_00114366	1	Gstm7	CUFF.47005.1	ENSMUST00000004137	j	TSS68333;
XLOC_060089	2.119854877	0.35672134	5.942607398	TCONS_00186685	1	Layn	CUFF.72313.1	ENSMUST00000217212	j	TSS110795;
XLOC_032896	2.118974198	0.269125854	7.873543784	TCONS_00100636	1	Prkra	CUFF.40808.2	ENSMUST00000002808	j	TSS60165;
XLOC_050385	2.117900299	0.441046586	4.801987745	TCONS_00154622	1	Tyrobp	ENSMUST00000207982	ENSMUST00000207982	=	TSS92260;
XLOC_032484	2.115108718	0.266806203	7.927509542	TCONS_00098795	1	Sardh	CUFF.39167.5	ENSMUST00000156434	=	TSS59210;
XLOC_045814	2.114199106	0.427806788	4.941948478	TCONS_00140855	1		CUFF.55353.1		u	TSS84119;
XLOC_011415	2.11072087	0.512712712	4.11677109	TCONS_00036328	1		CUFF.14452.1		u	TSS21460;
XLOC_019755	2.108596072	0.41387161	5.094807226	TCONS_00059584	1	Fam216b	CUFF.23181.1	ENSMUST00000118785	=	TSS35720;
XLOC_056628	2.106997648	0.524567528	4.016637586	TCONS_00175049	1	Plekha2	CUFF.67521.3	ENSMUST00000064883	j	TSS104044;
XLOC_020476	2.096537804	0.283644413	7.391429927	TCONS_00060773	1	Fyb	ENSMUST00000226412	ENSMUST00000226412	=	TSS36646;
XLOC_025597	2.095668033	0.374159561	5.601000886	TCONS_00076762	1	Tfb1m	CUFF.30168.1	ENSMUST00000041003	=	TSS46183;
XLOC_010574	2.094920438	0.500183095	4.188307155	TCONS_00034337	1	Kpna2	ENSMUST00000145331	ENSMUST00000145331	=	TSS20174;
XLOC_029075	2.09266047	0.478699962	4.37154927	TCONS_00086688	1	Cnnm1	CUFF.37591.1	ENSMUST00000223787	j	TSS52244;
XLOC_054253	2.084579199	0.389257267	5.355273681	TCONS_00167886	1	Sult1a1	ENSMUST00000106373	ENSMUST00000106373	=	TSS99840;
XLOC_002458	2.081540466	0.485271699	4.289433053	TCONS_00007984	1	Erbb4	CUFF.1539.3	ENSMUST00000119142	j	TSS4651;
XLOC_019900	2.079110632	0.508399631	4.089520344	TCONS_00059901	1	AC114585.1	CUFF.23561.1	ENSMUST00000228080	x	TSS35936;
XLOC_031435	2.077338307	0.228634653	9.085841884	TCONS_00094357	1	BC052040	ENSMUST00000166472	ENSMUST00000166472	=	TSS56803;
XLOC_033761	2.076374476	0.475436111	4.367304938	TCONS_00103737	1	Nrsn2	CUFF.43384.2	ENSMUST00000079278	j	TSS61957;
XLOC_051274	2.075228347	0.441991777	4.695174111	TCONS_00157596	1	Ucp2	ENSMUST00000126534	ENSMUST00000126534	=	TSS93960;
XLOC_013373	2.074051533	0.475479292	4.362022843	TCONS_00042186	1	CT010455.1	CUFF.16725.1	ENSMUST00000218579	x	TSS25043;
XLOC_011934	2.072920727	0.316089433	6.558019694	TCONS_00037786	1	1700086L19Rik	ENSMUST00000095617	ENSMUST00000095617	=	TSS22368;
XLOC_042035	2.070897002	0.513731775	4.031086069	TCONS_00127763	1		CUFF.52376.1		u	TSS76529;
XLOC_060169	2.06652684	0.420303488	4.916749207	TCONS_00187018	1	Cplx3	CUFF.72674.3	ENSMUST00000217015	=	TSS110968;
XLOC_047129	2.063049875	0.429304398	4.805564267	TCONS_00144729	1	Itpr1	ENSMUST00000032192	ENSMUST00000032192	=	TSS86405;
XLOC_012500	2.06250778	0.445273037	4.632006899	TCONS_00039830	1		CUFF.17488.1		u	TSS23575;
XLOC_017404	2.060300321	0.474053543	4.346134207	TCONS_00052209	1	2610042L04Rik	ENSMUST00000165466	ENSMUST00000165466	=	TSS31427;
XLOC_027409	2.059366683	0.456711941	4.509115037	TCONS_00081911	1	Eif1a	CUFF.34768.1	ENSMUST00000168382	o	TSS49316;
XLOC_012668	2.059150026	0.42549918	4.839374836	TCONS_00040244	1	Zfp125	CUFF.14565.1	ENSMUST00000208744	j	TSS23840;
XLOC_013269	2.057553397	0.378520539	5.435777418	TCONS_00041943	1	Tmed10	CUFF.16313.1	ENSMUST00000040766	o	TSS24885;
XLOC_024665	2.053413732	0.425367983	4.827381972	TCONS_00073223	1	Tmem181a	ENSMUST00000228334	ENSMUST00000228334	=	TSS44179;
XLOC_003313	2.053088309	0.413794435	4.961614118	TCONS_00011080	1	Rcsd1	ENSMUST00000097474	ENSMUST00000097474	=	TSS6384;
XLOC_010368	2.053008588	0.488209774	4.205177152	TCONS_00033491	1	Krt24	ENSMUST00000017255	ENSMUST00000017255	=	TSS19708;
XLOC_063099	2.047055908	0.312979392	6.540545358	TCONS_00194693	1	Usp27x	CUFF.75491.1	ENSMUST00000178293	j	TSS115710;
XLOC_008753	2.042842591	0.443911246	4.601916732	TCONS_00027286	1	Arhgap23	CUFF.12976.1	ENSMUST00000121799	o	TSS16194;
XLOC_048533	2.04159087	0.394057364	5.180948396	TCONS_00149278	1	Arhgap25	ENSMUST00000145128	ENSMUST00000145128	=	TSS89039;
XLOC_014723	2.041074476	0.262712924	7.769219894	TCONS_00044869	1	Ly86	CUFF.18154.1	ENSMUST00000021860	j	TSS26936;
XLOC_024895	2.039566597	0.34064219	5.98741628	TCONS_00074000	1	Gng13	ENSMUST00000172002	ENSMUST00000172002	=	TSS44627;
XLOC_041458	2.038937267	0.455428623	4.476963379	TCONS_00127079	1	Tmem88b	CUFF.52567.1	ENSMUST00000097742	j	TSS75898;
XLOC_062218	2.031703224	0.310460331	6.544163685	TCONS_00192341	1	Zfp275	CUFF.76291.1	ENSMUST00000033731	o	TSS114286;
XLOC_009185	2.027585292	0.493925671	4.10504133	TCONS_00029123	1	Inpp5j	ENSMUST00000044507	ENSMUST00000044507	=	TSS17232;
XLOC_037662	2.026499493	0.438893856	4.617288364	TCONS_00115071	1	Enpep	CUFF.47540.3	ENSMUST00000029658	j	TSS68747;
XLOC_006852	2.021424332	0.409237869	4.939485041	TCONS_00021611	1	Kcnmb4	ENSMUST00000068233	ENSMUST00000068233	=	TSS12743;
XLOC_022972	2.02111406	0.450136963	4.489997995	TCONS_00068525	1	Ubxn7	CUFF.28578.1	ENSMUST00000115151	j	TSS41253;
XLOC_048361	2.017628568	0.442788971	4.55663691	TCONS_00148734	1	Atoh8	CUFF.59453.1	ENSMUST00000206425	j	TSS88722;
XLOC_039583	2.009070158	0.329115789	6.104447805	TCONS_00120398	1	Cd164l2	ENSMUST00000150744	ENSMUST00000150744	=	TSS72097;
XLOC_013422	2.004905938	0.312692643	6.411746422	TCONS_00042335	1	Ttc7b	ENSMUST00000062957	ENSMUST00000062957	=	TSS25133;
XLOC_016491	2.00205601	0.395737665	5.059048418	TCONS_00050373	1	Cep72	CUFF.19372.2	ENSMUST00000223417	=	TSS30145;
XLOC_054486	2.001505741	0.294628068	6.793330161	TCONS_00169006	1	Dusp8	ENSMUST00000039926	ENSMUST00000039926	=	TSS100381;
XLOC_034107	1.999775126	0.456252275	4.383046911	TCONS_00105056	1	Ppp1r3d	ENSMUST00000058678	ENSMUST00000058678	=	TSS62664;
XLOC_035509	1.991988576	0.454493577	4.382875085	TCONS_00107951	1	Gpatch4	ENSMUST00000029707	ENSMUST00000029707	=	TSS64666;
XLOC_021780	1.987415491	0.31463429	6.316588988	TCONS_00065274	1	Rbfox2	CUFF.25825.5	ENSMUST00000227930	=	TSS39277;
XLOC_036067	1.985181193	0.47273833	4.199323527	TCONS_00110039	1	Neurog2	ENSMUST00000029587	ENSMUST00000029587	=	TSS65826;
XLOC_050670	1.977306904	0.41418356	4.773986938	TCONS_00155310	1	Shank1	CUFF.63452.4	ENSMUST00000107938	j	TSS92682;
XLOC_027716	1.9766091	0.472026869	4.187492768	TCONS_00083118	1		CUFF.33929.1		u	TSS49990;
XLOC_041425	1.974890465	0.347319248	5.686095646	TCONS_00126910	1	Ajap1	CUFF.52464.4	ENSMUST00000105646	j	TSS75818;
XLOC_008616	1.971950983	0.320513599	6.15247212	TCONS_00026765	1	Trim37	CUFF.12477.3	ENSMUST00000041282	j	TSS15880;
XLOC_008462	1.968298745	0.326909585	6.020926989	TCONS_00026111	1	2210008F06Rik	ENSMUST00000180805	ENSMUST00000180805	=	TSS15518;
XLOC_008932	1.966733315	0.465134039	4.228315176	TCONS_00028015	1	Mrc2	ENSMUST00000126931	ENSMUST00000126931	=	TSS16625;
XLOC_023149	1.965609861	0.390146434	5.038133605	TCONS_00069313	1	Filip1l	ENSMUST00000159816	ENSMUST00000159816	=	TSS41669;
XLOC_024947	1.962941213	0.299943308	6.544374086	TCONS_00074227	1	Ppard	ENSMUST00000002320	ENSMUST00000002320	=	TSS44741;
XLOC_026255	1.958843383	0.250220071	7.828482238	TCONS_00079404	1	Foxp4	CUFF.32179.9	ENSMUST00000113265	j	TSS47587;
XLOC_005385	1.952657798	0.431069055	4.529802765	TCONS_00016854	1	Cep290	CUFF.8358.2	ENSMUST00000220346	j	TSS9955;
XLOC_025055	1.949057283	0.289105448	6.741682993	TCONS_00074756	1		CUFF.31598.1		u	TSS45019;
XLOC_055386	1.948565483	0.280351745	6.950431084	TCONS_00170650	1		CUFF.67474.1		u	TSS101587;
XLOC_041417	1.946152539	0.433903697	4.485217697	TCONS_00126860	1	Hes3	CUFF.52451.3	ENSMUST00000094438	j	TSS75802;
XLOC_061504	1.944615916	0.472621523	4.114531019	TCONS_00190802	1		CUFF.74165.1		u	TSS113239;
XLOC_042724	1.94330112	0.447386135	4.343677571	TCONS_00130059	1	Gm15478	CUFF.54431.1	ENSMUST00000145914	j	TSS77931;
XLOC_033744	1.940418792	0.332586176	5.834333868	TCONS_00103673	1	Snph	CUFF.43338.5	ENSMUST00000028951	j	TSS61923;
XLOC_013490	1.939249916	0.308826643	6.279412609	TCONS_00042604	1	Clmn	CUFF.16980.5	ENSMUST00000223342	j	TSS25284;
XLOC_027130	1.93601627	0.481395713	4.021673269	TCONS_00080955	1		CUFF.33642.2		u	TSS48743;
XLOC_012327	1.933964868	0.436729555	4.428289418	TCONS_00039163	1	Wdr25	ENSMUST00000221377	ENSMUST00000221377	=	TSS23195;
XLOC_012638	1.933505786	0.334810198	5.774930993	TCONS_00040192	1	2410004P03Rik	CUFF.14523.4	ENSMUST00000095823	j	TSS23804;
XLOC_010677	1.931561646	0.248135512	7.784301547	TCONS_00034869	1	Rnf157	CUFF.13795.1	ENSMUST00000100202	j	TSS20441;
XLOC_006272	1.931186031	0.32367269	5.96647814	TCONS_00019551	1	Stox1	CUFF.6877.3	ENSMUST00000133371	j	TSS11556;
XLOC_037363	1.931075437	0.470797783	4.101708854	TCONS_00114038	1	Tshb	ENSMUST00000196958	ENSMUST00000196958	=	TSS68155;
XLOC_009098	1.930114315	0.425593845	4.535108624	TCONS_00028690	1	6030468B19Rik	ENSMUST00000106331	ENSMUST00000106331	=	TSS17004;
XLOC_029284	1.928790977	0.419761878	4.594964619	TCONS_00087547	1	Frmd8	ENSMUST00000025728	ENSMUST00000025728	=	TSS52717;
XLOC_063121	1.927328711	0.457416615	4.213508313	TCONS_00194774	1	Suv39h1	ENSMUST00000115638	ENSMUST00000115638	=	TSS115760;
XLOC_011948	1.927074991	0.324637236	5.93608736	TCONS_00037853	1	Ppp1r36	ENSMUST00000063977	ENSMUST00000063977	=	TSS22409;
XLOC_008515	1.925592839	0.309797434	6.21565136	TCONS_00026375	1	Adap2	ENSMUST00000021050	ENSMUST00000021050	=	TSS15668;
XLOC_039602	1.92449132	0.474719499	4.053954649	TCONS_00120474	1	Pafah2	ENSMUST00000105869	ENSMUST00000105869	=	TSS72146;
XLOC_024937	1.921886838	0.414653556	4.634921873	TCONS_00074169	1	Hmga1	CUFF.31175.3	ENSMUST00000119486	=	TSS44709;
XLOC_009186	1.91983672	0.477672443	4.019149	TCONS_00029129	1	Smtn	ENSMUST00000020718	ENSMUST00000020718	=	TSS17234;
XLOC_035450	1.913885159	0.339584038	5.635969137	TCONS_00107756	1	Ctso	ENSMUST00000029649	ENSMUST00000029649	=	TSS64551;
XLOC_027782	1.913799531	0.322023733	5.943038768	TCONS_00083348	1	Rit2	CUFF.34270.1	ENSMUST00000153060	j	TSS50120;
XLOC_046376	1.913106427	0.340763146	5.614182313	TCONS_00142282	1	Zyx	ENSMUST00000203329	ENSMUST00000203329	=	TSS85015;
XLOC_003442	1.911957797	0.449563555	4.252919915	TCONS_00011557	1	Ifi203-ps	ENSMUST00000155076	ENSMUST00000155076	=	TSS6627;
XLOC_026229	1.911223263	0.324773333	5.88479123	TCONS_00079295	1	Gm5093	ENSMUST00000166852	ENSMUST00000166852	=	TSS47534;
XLOC_025954	1.908916721	0.324526039	5.88216812	TCONS_00078107	1	Wiz	CUFF.31435.3	ENSMUST00000170617	j	TSS46930;
XLOC_051888	1.904342885	0.299484562	6.358734731	TCONS_00160171	1	Eps8l2	CUFF.66632.4	ENSMUST00000026577	j	TSS95420;
XLOC_041029	1.9015255	0.365974433	5.195787814	TCONS_00125340	1	Gja4	ENSMUST00000053753	ENSMUST00000053753	=	TSS74925;
XLOC_039560	1.90093421	0.378910257	5.016845481	TCONS_00120317	1	Tmem200b	ENSMUST00000094666	ENSMUST00000094666	=	TSS72047;
XLOC_008426	1.900806995	0.461918755	4.115024506	TCONS_00025948	1	Mir22hg	ENSMUST00000149940	ENSMUST00000149940	=	TSS15430;
XLOC_009226	1.900654744	0.431961003	4.400060961	TCONS_00029352	1	Camk2b	CUFF.9439.1	ENSMUST00000019133	j	TSS17347;
XLOC_008084	1.899643999	0.275721864	6.889711141	TCONS_00024585	1	Gpx3	ENSMUST00000125094	ENSMUST00000125094	=	TSS14690;
XLOC_038472	1.899632002	0.396642411	4.789281101	TCONS_00116610	1	Ccne2	ENSMUST00000145430	ENSMUST00000145430	=	TSS69850;
XLOC_056333	1.898109319	0.3552029	5.3437326	TCONS_00174158	1	Necab2	ENSMUST00000098363	ENSMUST00000098363	=	TSS103541;
XLOC_060624	1.892416552	0.228220361	8.292058374	TCONS_00188608	1	Pik3cb	ENSMUST00000035037	ENSMUST00000035037	=	TSS111866;
XLOC_040247	1.891215871	0.448390567	4.217786921	TCONS_00122600	1	Fam205c	ENSMUST00000055944	ENSMUST00000055944	=	TSS73350;
XLOC_055765	1.889410183	0.377235566	5.008568526	TCONS_00171818	1	Hapln4	ENSMUST00000007738	ENSMUST00000007738	=	TSS102271;
XLOC_057010	1.886976879	0.24097984	7.830434593	TCONS_00176395	1	Slc5a5	ENSMUST00000000809	ENSMUST00000000809	=	TSS104786;
XLOC_032285	1.882585445	0.314101821	5.993551508	TCONS_00097861	1	Taf3	CUFF.38514.1	ENSMUST00000026888	j	TSS58724;
XLOC_039664	1.878695311	0.409475632	4.588051559	TCONS_00120786	1	Camk2n1	CUFF.51913.2	ENSMUST00000050918	j	TSS72299;
XLOC_057487	1.877988357	0.312399089	6.011503953	TCONS_00178082	1	Cdyl2	CUFF.70393.3	ENSMUST00000109102	j	TSS105722;
XLOC_029225	1.876967652	0.205195833	9.147201591	TCONS_00087270	1		CUFF.36009.1		u	TSS52577;
XLOC_035745	1.876407984	0.395701029	4.741984095	TCONS_00108902	1	Hfe2	ENSMUST00000049208	ENSMUST00000049208	=	TSS65186;
XLOC_029314	1.874286447	0.443073222	4.230195716	TCONS_00087697	1	Plcb3	ENSMUST00000025912	ENSMUST00000025912	=	TSS52793;
XLOC_030596	1.870438117	0.232792818	8.034775867	TCONS_00091168	1	Olfm1	ENSMUST00000152415	ENSMUST00000152415	=	TSS54932;
XLOC_037525	1.868551542	0.203994685	9.159805021	TCONS_00114617	1	Slc30a7	ENSMUST00000198571	ENSMUST00000198571	=	TSS68477;
XLOC_030836	1.865982224	0.366978588	5.084716891	TCONS_00092261	1	Kif5c	CUFF.40017.1	ENSMUST00000028102	j	TSS55540;
XLOC_011997	1.865620661	0.46542977	4.008382746	TCONS_00038041	1	Plekhd1	CUFF.16018.1	ENSMUST00000140770	j	TSS22535;
XLOC_025488	1.865143042	0.437363224	4.264517314	TCONS_00076439	1	Vit	ENSMUST00000024880	ENSMUST00000024880	=	TSS45982;
XLOC_007758	1.863489375	0.43373202	4.296407206	TCONS_00023441	1	Aftph	CUFF.9742.1	ENSMUST00000146722	x	TSS14020;
XLOC_030785	1.862658993	0.365827334	5.091634281	TCONS_00092143	1	Olfml2a	ENSMUST00000057279	ENSMUST00000057279	=	TSS55463;
XLOC_027450	1.859347849	0.395888183	4.696649026	TCONS_00082050	1	Gm4221	CUFF.34938.1	ENSMUST00000181538	j	TSS49392;
XLOC_010178	1.85554519	0.433003952	4.285284655	TCONS_00032762	1	Ypel2	CUFF.12467.3	ENSMUST00000018571	j	TSS19295;
XLOC_013285	1.854126358	0.266350861	6.961217805	TCONS_00041978	1	Tmed8	CUFF.16398.1	ENSMUST00000037418	j	TSS24911;
XLOC_021231	1.85162761	0.341508785	5.421903297	TCONS_00063438	1	Tns2	ENSMUST00000046144	ENSMUST00000046144	=	TSS38211;
XLOC_025389	1.848447554	0.374690813	4.933260943	TCONS_00076028	1	Catsperd	CUFF.32384.1	ENSMUST00000112979	o	TSS45746;
XLOC_003341	1.846945369	0.366662485	5.037181173	TCONS_00011170	1	Mgst3	CUFF.4045.1	ENSMUST00000028005	j	TSS6429;
XLOC_000114	1.846505658	0.295132235	6.256536687	TCONS_00000354	1	Gdap1	ENSMUST00000026879	ENSMUST00000026879	=	TSS208;
XLOC_042404	1.842460103	0.436843481	4.21766647	TCONS_00129016	1	Tacc3	CUFF.53587.1	ENSMUST00000079534	j	TSS77270;
XLOC_001856	1.840310138	0.441651573	4.166882338	TCONS_00006091	1	Cd34	ENSMUST00000016638	ENSMUST00000016638	=	TSS3542;
XLOC_029082	1.83777934	0.368812262	4.982967022	TCONS_00086716	1	Scd3	ENSMUST00000026220	ENSMUST00000026220	=	TSS52264;
XLOC_029760	1.837008383	0.433139294	4.241149234	TCONS_00089321	1	Nrap	CUFF.38066.3	ENSMUST00000073536	j	TSS53701;
XLOC_056388	1.834714817	0.408600193	4.490244621	TCONS_00174387	1	Pcp2	CUFF.66808.3	ENSMUST00000144977	j	TSS103657;
XLOC_024024	1.834140681	0.351213002	5.222302908	TCONS_00072468	1	C2cd2	ENSMUST00000170757	ENSMUST00000170757	=	TSS43480;
XLOC_011457	1.830414687	0.360502515	5.077397824	TCONS_00036447	1	Odc1	ENSMUST00000171737	ENSMUST00000171737	=	TSS21533;
XLOC_019652	1.829873545	0.37680228	4.856322915	TCONS_00059249	1	Nefm	ENSMUST00000111089	ENSMUST00000111089	=	TSS35516;
XLOC_016077	1.828872113	0.403011953	4.538009601	TCONS_00048861	1	Gfod1	CUFF.18299.1	ENSMUST00000055341	j	TSS29312;
XLOC_040299	1.823398342	0.447549572	4.074181846	TCONS_00122901	1	Shb	CUFF.49167.3	ENSMUST00000061986	j	TSS73481;
XLOC_033201	1.821628244	0.363777584	5.007532969	TCONS_00101559	1	Dgkz	CUFF.41244.4	ENSMUST00000111303	j	TSS60749;
XLOC_038832	1.820551438	0.278730979	6.531571932	TCONS_00117712	1	Smc2	ENSMUST00000117280	ENSMUST00000117280	=	TSS70504;
XLOC_015228	1.817399864	0.389667555	4.663975336	TCONS_00046422	1	Ell2	ENSMUST00000001583	ENSMUST00000001583	=	TSS27864;
XLOC_027340	1.810902642	0.170982534	10.59115572	TCONS_00081702	1	Pcdhb9	ENSMUST00000057228	ENSMUST00000057228	=	TSS49208;
XLOC_000252	1.809880643	0.175696623	10.30116921	TCONS_00000665	1	Arid5a	ENSMUST00000126413	ENSMUST00000126413	=	TSS411;
XLOC_038536	1.808597627	0.322534546	5.607453983	TCONS_00116765	1	Ggh	CUFF.48550.1	ENSMUST00000098242	j	TSS69945;
XLOC_059062	1.808243924	0.405121709	4.463458469	TCONS_00182425	1	Ctsh	ENSMUST00000132718	ENSMUST00000132718	=	TSS108489;
XLOC_014592	1.805399375	0.447868352	4.031093881	TCONS_00044557	1	4932702P03Rik	ENSMUST00000151220	ENSMUST00000151220	=	TSS26726;
XLOC_029127	1.80314564	0.356043095	5.064402785	TCONS_00086902	1	Ina	ENSMUST00000037636	ENSMUST00000037636	=	TSS52365;
XLOC_007711	1.802041011	0.273927295	6.578537614	TCONS_00023321	1	Ikzf1	ENSMUST00000141436	ENSMUST00000141436	=	TSS13948;
XLOC_038515	1.799902417	0.374140486	4.810766231	TCONS_00116715	1	Calb1	CUFF.48478.2	ENSMUST00000029876	j	TSS69912;
XLOC_048936	1.799464734	0.428941628	4.195127299	TCONS_00150967	1	Prmt8	CUFF.61341.4	ENSMUST00000032500	j	TSS89944;
XLOC_014767	1.798752297	0.428766198	4.195182145	TCONS_00044993	1	Gcnt2	ENSMUST00000110191	ENSMUST00000110191	=	TSS27022;
XLOC_027492	1.794023079	0.352455878	5.09006429	TCONS_00082185	1	Cd74	ENSMUST00000097563	ENSMUST00000097563	=	TSS49475;
XLOC_032240	1.793450096	0.110813512	16.18439911	TCONS_00097681	1	Hspa14	CUFF.38338.1	ENSMUST00000027961	j	TSS58620;
XLOC_051232	1.786740976	0.2844056	6.282369174	TCONS_00157417	1	Pak1	ENSMUST00000205757	ENSMUST00000205757	=	TSS93854;
XLOC_005239	1.784563968	0.379321532	4.704620792	TCONS_00016394	1	Ttc41	CUFF.7880.4	ENSMUST00000075632	j	TSS9667;
XLOC_057237	1.784036834	0.11215936	15.90626801	TCONS_00177169	1	Gm9619	ENSMUST00000211587	ENSMUST00000211587	=	TSS105232;
XLOC_059496	1.782688962	0.383393195	4.649766836	TCONS_00184532	1	Zkscan7	CUFF.75274.1	ENSMUST00000063980	o	TSS109604;
XLOC_034135	1.779264662	0.254678094	6.986327844	TCONS_00105199	1	Stmn3	ENSMUST00000103045	ENSMUST00000103045	=	TSS62735;
XLOC_049044	1.778635689	0.438535248	4.05585571	TCONS_00151311	1	Ybx3	CUFF.61435.3	ENSMUST00000032309	j	TSS90118;
XLOC_012225	1.777996257	0.202670339	8.77284887	TCONS_00038807	1	Calm1	CUFF.16833.1	ENSMUST00000110082	j	TSS22982;
XLOC_031836	1.777193356	0.436719984	4.069411572	TCONS_00095999	1	Hck	CUFF.43420.2	ENSMUST00000003370	j	TSS57715;
XLOC_030658	1.774939559	0.406682874	4.364431535	TCONS_00091630	1	Lamc3	ENSMUST00000138325	ENSMUST00000138325	=	TSS55161;
XLOC_021096	1.774084157	0.334608175	5.301974932	TCONS_00062934	1	Panx2	CUFF.26549.1	ENSMUST00000161372	j	TSS37920;
XLOC_042674	1.772045193	0.374479831	4.732017716	TCONS_00129859	1	Klf3	ENSMUST00000165536	ENSMUST00000165536	=	TSS77822;
XLOC_063468	1.76388713	0.363660888	4.850362492	TCONS_00195652	1	Rtl8a	ENSMUST00000088779	ENSMUST00000088779	=	TSS116288;
XLOC_023803	1.761284896	0.425804325	4.136371555	TCONS_00071692	1	Gpr15	ENSMUST00000089318	ENSMUST00000089318	=	TSS43007;
XLOC_064281	1.760693234	0.348974471	5.045335348	TCONS_00197811	1	Sat1	CUFF.77582.1	ENSMUST00000152463	j	TSS117570;
XLOC_032328	1.757956918	0.212837236	8.259630451	TCONS_00098053	1	Hacd1	ENSMUST00000131730	ENSMUST00000131730	=	TSS58826;
XLOC_023425	1.757229692	0.286737496	6.12835684	TCONS_00070299	1	Cpped1	CUFF.27705.1	ENSMUST00000096272	j	TSS42231;
XLOC_031548	1.754024811	0.417456402	4.201695796	TCONS_00094937	1	Fgf7	ENSMUST00000138576	ENSMUST00000138576	=	TSS57105;
XLOC_019048	1.749444404	0.42921731	4.075894339	TCONS_00057161	1	Prkcd	CUFF.21527.1	ENSMUST00000112211	j	TSS34320;
XLOC_029553	1.749256523	0.385290462	4.540098177	TCONS_00088514	1	9930021J03Rik	CUFF.37017.1	ENSMUST00000175726	j	TSS53256;
XLOC_006657	1.748362348	0.409189506	4.272744832	TCONS_00021125	1	Nedd1	ENSMUST00000020163	ENSMUST00000020163	=	TSS12430;
XLOC_008904	1.746996019	0.342980289	5.093575568	TCONS_00027900	1	Fmnl1	CUFF.13386.2	ENSMUST00000218163	j	TSS16553;
XLOC_054139	1.746403856	0.215696997	8.096560817	TCONS_00167406	1	Gm4366	ENSMUST00000201488	ENSMUST00000201488	=	TSS99598;
XLOC_005072	1.745638993	0.407139191	4.287572979	TCONS_00015628	1	Fgf22	ENSMUST00000219981	ENSMUST00000219981	=	TSS9234;
XLOC_027819	1.745203443	0.31182827	5.596681277	TCONS_00083436	1	Fam13b	ENSMUST00000040506	ENSMUST00000040506	=	TSS50172;
XLOC_003526	1.743521767	0.41419406	4.209432085	TCONS_00011892	1	Ccdc121	ENSMUST00000058825	ENSMUST00000058825	=	TSS6819;
XLOC_050375	1.742622999	0.400369899	4.352532502	TCONS_00154550	1	Gm5113	CUFF.63038.1	ENSMUST00000085668	j	TSS92228;
XLOC_024411	1.741262019	0.410610601	4.240665033	TCONS_00072875	1		CUFF.29077.1		u	TSS43877;
XLOC_015868	1.735672562	0.295603174	5.871630333	TCONS_00048281	1	4930558J22Rik	ENSMUST00000139822	ENSMUST00000139822	=	TSS28962;
XLOC_002426	1.729971617	0.429927596	4.023867356	TCONS_00007882	1	Plekhm3	ENSMUST00000139649	ENSMUST00000139649	=	TSS4598;
XLOC_021993	1.728112006	0.181148644	9.539745748	TCONS_00066145	1	Dbx2	CUFF.26795.1	ENSMUST00000054244	j	TSS39749;
XLOC_026802	1.727636374	0.364759929	4.736365586	TCONS_00080609	1		CUFF.31487.1		u	TSS48407;
XLOC_025463	1.726302365	0.266541055	6.476684674	TCONS_00076315	1	Clip4	ENSMUST00000024854	ENSMUST00000024854	=	TSS45915;
XLOC_047916	1.723900264	0.388144069	4.441392781	TCONS_00147620	1	Hipk2	CUFF.58487.2	ENSMUST00000160962	=	TSS88000;
XLOC_029633	1.722253298	0.394061647	4.370517436	TCONS_00088833	1	Tll2	CUFF.37484.2	ENSMUST00000025986	j	TSS53435;
XLOC_064458	1.722058277	0.430381409	4.001237602	TCONS_00198213	1		CUFF.75595.1		u	TSS117831;
XLOC_062225	1.715497783	0.268579293	6.387304721	TCONS_00192375	1	Slc6a8	ENSMUST00000033752	ENSMUST00000033752	=	TSS114302;
XLOC_053553	1.710627598	0.340363732	5.025880958	TCONS_00165325	1	Anpep	CUFF.64605.2	ENSMUST00000107392	j	TSS98417;
XLOC_013479	1.703970768	0.415802183	4.09803228	TCONS_00042568	1	Serpina1e	ENSMUST00000122229	ENSMUST00000122229	=	TSS25263;
XLOC_009939	1.703043355	0.289605596	5.880560931	TCONS_00031873	1	Pitpnm3	CUFF.11610.2	ENSMUST00000075258	j	TSS18786;
XLOC_007680	1.697332877	0.379324986	4.474613962	TCONS_00023207	1	Dbnl	ENSMUST00000109845	ENSMUST00000109845	=	TSS13883;
XLOC_051254	1.695795155	0.264155727	6.419679679	TCONS_00157494	1	Arrb1	CUFF.65170.4	ENSMUST00000179755	j	TSS93904;
XLOC_012796	1.695189662	0.319492945	5.305875103	TCONS_00040547	1	Gpr22	ENSMUST00000057783	ENSMUST00000057783	=	TSS24029;
XLOC_019736	1.694808564	0.275160849	6.159337608	TCONS_00059547	1	Gtf2f2	CUFF.23094.1	ENSMUST00000088922	j	TSS35690;
XLOC_055725	1.691062136	0.40431927	4.182492062	TCONS_00171657	1	Npy1r	ENSMUST00000212588	ENSMUST00000212588	=	TSS102193;
XLOC_044843	1.689637976	0.258708955	6.531037843	TCONS_00137659	1	Pgam5	CUFF.55588.2	ENSMUST00000112505	j	TSS82254;
XLOC_019099	1.684724253	0.099213879	16.9807316	TCONS_00057446	1	Zfp488	CUFF.21736.3	ENSMUST00000166737	j	TSS34461;
XLOC_029051	1.682849998	0.340929227	4.936068436	TCONS_00086586	1	Zfp518a	CUFF.37474.1	ENSMUST00000050092	j	TSS52187;
XLOC_027355	1.682328529	0.41142048	4.089073376	TCONS_00081771	1	Rell2	ENSMUST00000163128	ENSMUST00000163128	=	TSS49228;
XLOC_010246	1.680792287	0.364367959	4.612898153	TCONS_00032977	1	Cacna1g	CUFF.12823.8	ENSMUST00000107789	j	TSS19432;
XLOC_047820	1.680564739	0.376641078	4.461979423	TCONS_00147215	1	Gcc1	ENSMUST00000090511	ENSMUST00000090511	=	TSS87790;
XLOC_056762	1.679216086	0.338547299	4.960063449	TCONS_00175470	1	Gm2033	ENSMUST00000210753	ENSMUST00000210753	=	TSS104289;
XLOC_023682	1.677208396	0.253993362	6.603355243	TCONS_00071256	1	Gm36028	CUFF.28802.1	ENSMUST00000205931	o	TSS42765;
XLOC_052424	1.675865324	0.382157241	4.385276914	TCONS_00161870	1	Apoe	CUFF.62584.4	ENSMUST00000172983	j	TSS96370;
XLOC_007936	1.674040274	0.317780208	5.267918609	TCONS_00023928	1	Ebf1	CUFF.10425.1	ENSMUST00000081265	j	TSS14341;
XLOC_043238	1.673277362	0.366098517	4.570565797	TCONS_00131768	1	Ankrd13a	CUFF.55826.3	ENSMUST00000102578	j	TSS78938;
XLOC_025545	1.673067889	0.359557014	4.653136565	TCONS_00076609	1	Prkce	CUFF.33285.3	ENSMUST00000097274	j	TSS46084;
XLOC_049134	1.672644117	0.244420871	6.843294975	TCONS_00151506	1	Rerg	CUFF.61610.2	ENSMUST00000203003	=	TSS90251;
XLOC_019682	1.669294409	0.368172771	4.533997465	TCONS_00059329	1	Pdlim2	ENSMUST00000022681	ENSMUST00000022681	=	TSS35564;
XLOC_009813	1.667705266	0.327921559	5.085683512	TCONS_00031322	1	Shisa6	CUFF.11279.2	ENSMUST00000123454	j	TSS18481;
XLOC_045016	1.667350234	0.324913822	5.13166914	TCONS_00138438	1	Cux2	CUFF.56158.3	ENSMUST00000111752	j	TSS82674;
XLOC_031452	1.665671018	0.390654914	4.263791285	TCONS_00094395	1	Eif2ak4	CUFF.41884.1	ENSMUST00000110874	o	TSS56827;
XLOC_004686	1.663578982	0.209030417	7.958549807	TCONS_00014248	1	Gm15198	ENSMUST00000117283	ENSMUST00000117283	=	TSS8450;
XLOC_025442	1.660887941	0.396576327	4.188066272	TCONS_00076199	1	Epb41l3	CUFF.32678.1	ENSMUST00000112680	j	TSS45853;
XLOC_051833	1.658605874	0.347906357	4.76739169	TCONS_00159851	1	Inpp5a	ENSMUST00000106098	ENSMUST00000106098	=	TSS95268;
XLOC_010484	1.656963254	0.224482309	7.381264308	TCONS_00033871	1	Mpp2	CUFF.13285.3	ENSMUST00000017458	j	TSS19927;
XLOC_008055	1.656042917	0.324778123	5.098997746	TCONS_00024420	1	Shroom1	ENSMUST00000109013	ENSMUST00000109013	=	TSS14616;
XLOC_015253	1.655950577	0.406936723	4.069307303	TCONS_00046533	1	CT025552.2	CUFF.19558.1	ENSMUST00000225497	j	TSS27926;
XLOC_040995	1.652464591	0.331316542	4.987570447	TCONS_00125199	1	Dnali1	ENSMUST00000036383	ENSMUST00000036383	=	TSS74847;
XLOC_025257	1.648230536	0.381998502	4.314756549	TCONS_00075482	1	Rcan2	ENSMUST00000044895	ENSMUST00000044895	=	TSS45452;
XLOC_018384	1.647945071	0.400797119	4.111668957	TCONS_00055246	1	Stmn4	CUFF.22801.1	ENSMUST00000121955	o	TSS33185;
XLOC_035760	1.642435218	0.350386375	4.68749739	TCONS_00109000	1	Prkab2	ENSMUST00000143927	ENSMUST00000143927	=	TSS65234;
XLOC_012263	1.638975148	0.316655067	5.175900583	TCONS_00038955	1	Ppp4r4	ENSMUST00000021631	ENSMUST00000021631	=	TSS23070;
XLOC_023367	1.638476065	0.261593394	6.263445884	TCONS_00070071	1	Srl	CUFF.27334.4	ENSMUST00000023161	j	TSS42098;
XLOC_021160	1.633575671	0.344481174	4.742133369	TCONS_00063185	1	Cacnb3	ENSMUST00000109150	ENSMUST00000109150	=	TSS38064;
XLOC_018733	1.632362692	0.38145943	4.279256364	TCONS_00056164	1	Ubac2	CUFF.23930.1	ENSMUST00000039803	o	TSS33761;
XLOC_062091	1.631311668	0.215643805	7.564843643	TCONS_00192034	1	Fhl1	ENSMUST00000023854	ENSMUST00000023854	=	TSS114090;
XLOC_032708	1.630617902	0.340835732	4.784175332	TCONS_00099882	1	Rnd3	ENSMUST00000017288	ENSMUST00000017288	=	TSS59767;
XLOC_013516	1.628808501	0.342504868	4.755577672	TCONS_00042706	1	Ccdc85c	ENSMUST00000222310	ENSMUST00000222310	=	TSS25332;
XLOC_010147	1.627102912	0.348305599	4.671480789	TCONS_00032616	1	Lhx1	CUFF.12343.2	ENSMUST00000018842	j	TSS19211;
XLOC_014374	1.62467202	0.396680249	4.095671575	TCONS_00044042	1	Ero1lb	ENSMUST00000221560	ENSMUST00000221560	=	TSS26388;
XLOC_034084	1.62278471	0.315378656	5.145512168	TCONS_00105000	1	Gm14421	ENSMUST00000121755	ENSMUST00000121755	=	TSS62631;
XLOC_011461	1.621892416	0.252752548	6.41691816	TCONS_00036464	1	Hpcal1	ENSMUST00000071858	ENSMUST00000071858	=	TSS21546;
XLOC_020610	1.621697402	0.368441893	4.40150111	TCONS_00061199	1	Dap	ENSMUST00000044524	ENSMUST00000044524	=	TSS36905;
XLOC_042709	1.620144818	0.322049686	5.030729375	TCONS_00129983	1	Uchl1	ENSMUST00000031131	ENSMUST00000031131	=	TSS77891;
XLOC_034050	1.609653308	0.373557293	4.308986434	TCONS_00104910	1	Ctsz	ENSMUST00000016400	ENSMUST00000016400	=	TSS62581;
XLOC_043990	1.608964885	0.283807761	5.669206784	TCONS_00134693	1	Kcnh2	ENSMUST00000115098	ENSMUST00000115098	=	TSS80598;
XLOC_008290	1.608637783	0.364862593	4.408886557	TCONS_00025310	1	Kcnab3	ENSMUST00000018614	ENSMUST00000018614	=	TSS15085;
XLOC_018331	1.603175124	0.354517086	4.522137827	TCONS_00055064	1	Rnaseh2b	ENSMUST00000166879	ENSMUST00000166879	=	TSS33078;
XLOC_008183	1.602546506	0.345958397	4.632194278	TCONS_00024883	1	Map2k3	CUFF.11116.2	ENSMUST00000019076	j	TSS14862;
XLOC_047903	1.601696809	0.285920128	5.601902955	TCONS_00147563	1	Creb3l2	CUFF.58416.2	ENSMUST00000041093	j	TSS87969;
XLOC_014893	1.600937133	0.314020336	5.09819572	TCONS_00045386	1	Secisbp2	CUFF.18668.1	ENSMUST00000040117	o	TSS27274;
XLOC_029492	1.599094479	0.374378682	4.271328883	TCONS_00088261	1	Anxa1	CUFF.36680.3	ENSMUST00000025561	j	TSS53118;
XLOC_006241	1.594608355	0.280093438	5.693129993	TCONS_00019344	1	Cdh23	CUFF.6819.1	ENSMUST00000105461	j	TSS11460;
XLOC_039259	1.594265671	0.15992272	9.968975478	TCONS_00119025	1	Cc2d1b	CUFF.50694.3	ENSMUST00000030320	j	TSS71318;
XLOC_002958	1.586719149	0.346038996	4.5853767	TCONS_00009624	1	Mapkapk2	CUFF.2973.1	ENSMUST00000016672	j	TSS5595;
XLOC_012813	1.586318562	0.372736034	4.255876591	TCONS_00040604	1	Cdhr3	CUFF.14851.6	ENSMUST00000095774	j	TSS24057;
XLOC_015555	1.58495125	0.320282433	4.948604999	TCONS_00047443	1	Hcn1	CUFF.20679.1	ENSMUST00000006991	j	TSS28451;
XLOC_028519	1.584511903	0.328778098	4.819396166	TCONS_00084832	1		CUFF.35238.1		u	TSS51163;
XLOC_021283	1.58053758	0.146696832	10.77417661	TCONS_00063643	1	Fbxo4	CUFF.24137.1	ENSMUST00000022791	j	TSS38329;
XLOC_029514	1.577745026	0.387827011	4.068166944	TCONS_00088347	1	Pip5k1b	CUFF.36822.4	ENSMUST00000025800	j	TSS53169;
XLOC_033491	1.571317104	0.374005762	4.2013179	TCONS_00102735	1	Gatm	CUFF.42253.6	ENSMUST00000028624	j	TSS61400;
XLOC_057488	1.571082457	0.070340192	22.33548727	TCONS_00178086	1	Gcsh	CUFF.70401.1	ENSMUST00000040484	j	TSS105726;
XLOC_021021	1.569682101	0.271875397	5.77353493	TCONS_00062636	1	Csdc2	ENSMUST00000038757	ENSMUST00000038757	=	TSS37733;
XLOC_009128	1.562433624	0.284689353	5.488205325	TCONS_00028844	1	Baiap2	ENSMUST00000106231	ENSMUST00000106231	=	TSS17092;
XLOC_011588	1.556870726	0.323745258	4.808937537	TCONS_00036758	1	Myt1l	ENSMUST00000218583	ENSMUST00000218583	=	TSS21746;
XLOC_006085	1.550667688	0.278777131	5.562392027	TCONS_00018940	1	Ccdc162	ENSMUST00000159978	ENSMUST00000159978	=	TSS11209;
XLOC_043235	1.54855758	0.272303819	5.686874263	TCONS_00131754	1	Fam222a	ENSMUST00000043650	ENSMUST00000043650	=	TSS78929;
XLOC_004869	1.538214958	0.378836203	4.060369488	TCONS_00014796	1	AC124421.1	ENSMUST00000219114	ENSMUST00000219114	=	TSS8787;
XLOC_047984	1.536618641	0.245527801	6.258430339	TCONS_00147816	1	Tpk1	CUFF.58663.3	ENSMUST00000067888	j	TSS88116;
XLOC_003790	1.531095682	0.355672272	4.304793499	TCONS_00012588	1		CUFF.858.1		u	TSS7261;
XLOC_006506	1.529519674	0.192939206	7.927469511	TCONS_00020529	1	Diras1	ENSMUST00000055125	ENSMUST00000055125	=	TSS12087;
XLOC_051897	1.523954988	0.27240332	5.594480225	TCONS_00160241	1	Tspan4	ENSMUST00000026585	ENSMUST00000026585	=	TSS95456;
XLOC_010154	1.520655647	0.24824871	6.12553292	TCONS_00032658	1	Znhit3	ENSMUST00000103195	ENSMUST00000103195	=	TSS19233;
XLOC_030889	1.515383302	0.366632585	4.133247742	TCONS_00092446	1		CUFF.40220.1		u	TSS55645;
XLOC_039388	1.512994985	0.354821174	4.264105679	TCONS_00119589	1	P3h1	ENSMUST00000121111	ENSMUST00000121111	=	TSS71629;
XLOC_000851	1.512949841	0.353842779	4.275768595	TCONS_00002920	1	Asb1	ENSMUST00000086843	ENSMUST00000086843	=	TSS1628;
XLOC_016597	1.51231485	0.232601432	6.501743495	TCONS_00050703	1	Xrcc4	ENSMUST00000159199	ENSMUST00000159199	=	TSS30357;
XLOC_028921	1.512178666	0.203028382	7.448114666	TCONS_00086113	1	Apba1	CUFF.36806.1	ENSMUST00000025830	j	TSS51908;
XLOC_030988	1.511234192	0.359350236	4.205463193	TCONS_00092862	1	Cdca7	ENSMUST00000102691	ENSMUST00000102691	=	TSS55885;
XLOC_027232	1.508091674	0.36351612	4.148623925	TCONS_00081307	1	2700062C07Rik	CUFF.34184.1	ENSMUST00000097646	j	TSS48949;
XLOC_038900	1.504692895	0.140078846	10.74175679	TCONS_00117914	1	E130308A19Rik	CUFF.49557.4	ENSMUST00000052420	=	TSS70624;
XLOC_016770	1.502516303	0.235976158	6.36723776	TCONS_00051361	1	Kif2a	ENSMUST00000022204	ENSMUST00000022204	=	TSS30710;
XLOC_016875	1.500533094	0.160298264	9.360881776	TCONS_00051611	1	Nim1k	CUFF.20721.1	ENSMUST00000178142	=	TSS30868;
XLOC_040282	1.500174404	0.279320526	5.370799008	TCONS_00122799	1	Rnf38	CUFF.49096.1	ENSMUST00000145378	=	TSS73443;
XLOC_036989	1.499014596	0.36947918	4.057101664	TCONS_00112679	1	Tmem131l	CUFF.45842.3	ENSMUST00000191758	j	TSS67398;
XLOC_029091	1.497852413	0.297796152	5.029791023	TCONS_00086736	1	Sema4g	ENSMUST00000026225	ENSMUST00000026225	=	TSS52279;
XLOC_019678	1.493664731	0.096049698	15.55095711	TCONS_00059313	1	Rhobtb2	ENSMUST00000022665	ENSMUST00000022665	=	TSS35552;
XLOC_039629	1.491430407	0.319359659	4.670065131	TCONS_00120574	1	Id3	ENSMUST00000008016	ENSMUST00000008016	=	TSS72207;
XLOC_048521	1.490695325	0.264689392	5.631866515	TCONS_00149242	1	Anxa4	CUFF.59858.1	ENSMUST00000135921	=	TSS89021;
XLOC_003812	1.489269803	0.21716576	6.857756041	TCONS_00012610	1		CUFF.971.1		u	TSS7283;
XLOC_025763	1.487546496	0.317136509	4.690555807	TCONS_00077136	1	Zfp994	ENSMUST00000179996	ENSMUST00000179996	=	TSS46449;
XLOC_049804	1.485309866	0.269495068	5.511454727	TCONS_00152777	1	Epn1	ENSMUST00000098845	ENSMUST00000098845	=	TSS91160;
XLOC_021518	1.483044917	0.325544898	4.555577207	TCONS_00064313	1	Azin1	CUFF.24862.1	ENSMUST00000110329	j	TSS38751;
XLOC_032558	1.482543654	0.335329434	4.421155743	TCONS_00099146	1	Dnm1	CUFF.39411.2	ENSMUST00000139624	j	TSS59375;
XLOC_050086	1.480918517	0.305629313	4.845472784	TCONS_00153538	1	Eml2	ENSMUST00000117338	ENSMUST00000117338	=	TSS91642;
XLOC_025696	1.480810614	0.234058918	6.326657519	TCONS_00077002	1	Thbs2	CUFF.30683.1	ENSMUST00000170872	o	TSS46355;
XLOC_039882	1.480779304	0.288965332	5.124418538	TCONS_00121372	1	Errfi1	ENSMUST00000073600	ENSMUST00000073600	=	TSS72665;
XLOC_021008	1.47807522	0.249910724	5.91441295	TCONS_00062548	1	Sgsm3	CUFF.26162.3	ENSMUST00000139517	j	TSS37690;
XLOC_039184	1.477954035	0.332733328	4.441857518	TCONS_00118615	1	Dnajc6	ENSMUST00000106930	ENSMUST00000106930	=	TSS71090;
XLOC_062275	1.472516753	0.17921342	8.216554064	TCONS_00192632	1	Brcc3	CUFF.76415.1	ENSMUST00000033544	j	TSS114418;
XLOC_055652	1.471540211	0.26972667	5.455671879	TCONS_00171462	1	Hpgd	CUFF.68309.1	ENSMUST00000034026	j	TSS102073;
XLOC_060899	1.471447057	0.355025623	4.144622145	TCONS_00189961	1	Scn10a	ENSMUST00000084787	ENSMUST00000084787	=	TSS112552;
XLOC_016724	1.464969093	0.274654715	5.333857438	TCONS_00051163	1	Cdk7	CUFF.20058.3	ENSMUST00000091299	j	TSS30604;
XLOC_051898	1.458522099	0.225134499	6.478447803	TCONS_00160247	1	Ap2a2	ENSMUST00000003038	ENSMUST00000003038	=	TSS95461;
XLOC_027512	1.457426784	0.357243803	4.079641895	TCONS_00082259	1	Gm17732	ENSMUST00000163259	ENSMUST00000163259	=	TSS49514;
XLOC_008408	1.457005662	0.288756756	5.045788998	TCONS_00025886	1	Rap1gap2	CUFF.11713.1	ENSMUST00000102521	x	TSS15394;
XLOC_009042	1.454021981	0.203823397	7.133734406	TCONS_00028370	1	Cdr2l	ENSMUST00000053288	ENSMUST00000053288	=	TSS16831;
XLOC_003566	1.453276038	0.284018066	5.116843658	TCONS_00012039	1	Mark1	CUFF.4849.1	ENSMUST00000027929	j	TSS6907;
XLOC_016034	1.451773131	0.336415519	4.315416645	TCONS_00048728	1	Bloc1s5	ENSMUST00000224115	ENSMUST00000224115	=	TSS29241;
XLOC_011980	1.451058288	0.345095503	4.204802074	TCONS_00037973	1	Rad51b	CUFF.15964.1	ENSMUST00000218039	j	TSS22487;
XLOC_048884	1.450382108	0.18331553	7.911943452	TCONS_00150701	1	C1s1	ENSMUST00000160505	ENSMUST00000160505	=	TSS89801;
XLOC_051493	1.447673822	0.326543993	4.433319406	TCONS_00158334	1	Wee1	ENSMUST00000033326	ENSMUST00000033326	=	TSS94419;
XLOC_018692	1.445047948	0.332270648	4.349008734	TCONS_00056071	1	Gpc5	ENSMUST00000176993	ENSMUST00000176993	=	TSS33700;
XLOC_012916	1.441741194	0.303762466	4.746278272	TCONS_00040851	1	Prkd1	CUFF.15141.4	ENSMUST00000002765	j	TSS24211;
XLOC_048477	1.440841777	0.141918194	10.15262198	TCONS_00149084	1	Paip2b	ENSMUST00000058383	ENSMUST00000058383	=	TSS88935;
XLOC_045075	1.439467757	0.24898788	5.781276404	TCONS_00138836	1	Ccdc92	CUFF.56345.2	ENSMUST00000143268	=	TSS82869;
XLOC_034040	1.439393087	0.263942767	5.453428792	TCONS_00104892	1	Vapb	CUFF.44050.1	ENSMUST00000067530	x	TSS62567;
XLOC_042281	1.434262081	0.233530915	6.141636885	TCONS_00128422	1	Agap3	CUFF.53226.1	ENSMUST00000024123	j	TSS76956;
XLOC_047519	1.431881238	0.322686597	4.437374378	TCONS_00146143	1	Apold1	ENSMUST00000167323	ENSMUST00000167323	=	TSS87203;
XLOC_052350	1.431299844	0.258983189	5.526612951	TCONS_00161605	1	Calm3	CUFF.62445.1	ENSMUST00000019514	j	TSS96227;
XLOC_004814	1.427564198	0.188569914	7.570476987	TCONS_00014575	1	Msl3l2	CUFF.6670.1	ENSMUST00000217668	j	TSS8663;
XLOC_012246	1.426042642	0.264836132	5.384622686	TCONS_00038876	1	Rin3	ENSMUST00000056950	ENSMUST00000056950	=	TSS23023;
XLOC_034910	1.423745716	0.339461106	4.194135025	TCONS_00106094	1	Gm15467	CUFF.44390.1	ENSMUST00000120582	o	TSS63564;
XLOC_016115	1.420271856	0.157365089	9.025329974	TCONS_00048994	1	Dek	ENSMUST00000138401	ENSMUST00000138401	=	TSS29396;
XLOC_062010	1.415844518	0.293798209	4.819105336	TCONS_00191864	1	Rab33a	ENSMUST00000033430	ENSMUST00000033430	=	TSS113973;
XLOC_051616	1.413812584	0.302204427	4.678331812	TCONS_00158847	1	Prkcb	ENSMUST00000143692	ENSMUST00000143692	=	TSS94718;
XLOC_032443	1.413064225	0.322919858	4.375897577	TCONS_00098549	1	Rabl6	ENSMUST00000058137	ENSMUST00000058137	=	TSS59073;
XLOC_032110	1.412500106	0.233836358	6.040549554	TCONS_00097145	1	Vapb	ENSMUST00000067530	ENSMUST00000067530	=	TSS58327;
XLOC_001149	1.409884468	0.302945013	4.653928633	TCONS_00003728	1	Fam72a	CUFF.3002.1	ENSMUST00000068613	j	TSS2144;
XLOC_040947	1.409059234	0.344275311	4.092826839	TCONS_00125075	1	Rlf	ENSMUST00000168615	ENSMUST00000168615	=	TSS74763;
XLOC_020519	1.406991906	0.285526287	4.927714087	TCONS_00060965	1	Zfr	CUFF.24319.1	ENSMUST00000122941	j	TSS36749;
XLOC_004940	1.404725308	0.325784609	4.31182219	TCONS_00015086	1	Ccdc6	CUFF.7132.1	ENSMUST00000147545	o	TSS8947;
XLOC_037760	1.403739697	0.246548189	5.693571308	TCONS_00115373	1	Rap1gds1	CUFF.47756.1	ENSMUST00000098574	j	TSS68936;
XLOC_030649	1.399813709	0.280235394	4.995135298	TCONS_00091574	1	Ncs1	CUFF.39369.1	ENSMUST00000000199	j	TSS55128;
XLOC_039316	1.399283636	0.195935846	7.141539757	TCONS_00119275	1	Mob3c	ENSMUST00000030477	ENSMUST00000030477	=	TSS71462;
XLOC_028918	1.392629163	0.339043098	4.107528423	TCONS_00086103	1	Gm21542	CUFF.36801.1	ENSMUST00000182307	o	TSS51899;
XLOC_032474	1.392484544	0.268041974	5.195024215	TCONS_00098738	1	Surf6	ENSMUST00000140392	ENSMUST00000140392	=	TSS59181;
XLOC_025117	1.388081011	0.226057549	6.140387778	TCONS_00075114	1	H2-Q4	ENSMUST00000081435	ENSMUST00000081435	=	TSS45212;
XLOC_003303	1.388074842	0.305032485	4.550580383	TCONS_00011027	1	Sft2d2	CUFF.3968.1	ENSMUST00000192565	=	TSS6361;
XLOC_012948	1.388063577	0.321700586	4.314768563	TCONS_00040920	1	Eapp	ENSMUST00000161592	ENSMUST00000161592	=	TSS24262;
XLOC_058759	1.386793052	0.330694652	4.193575687	TCONS_00181364	1	Calml4	ENSMUST00000213643	ENSMUST00000213643	=	TSS107884;
XLOC_046861	1.384424997	0.340472717	4.066184834	TCONS_00143663	1	M1ap	ENSMUST00000113980	ENSMUST00000113980	=	TSS85843;
XLOC_064107	1.381083701	0.265113675	5.209401967	TCONS_00197341	1	Tceal5	CUFF.77260.2	ENSMUST00000151592	=	TSS117294;
XLOC_008156	1.375971009	0.250013748	5.503581392	TCONS_00024796	1	Mprip	ENSMUST00000138234	ENSMUST00000138234	=	TSS14815;
XLOC_051660	1.375028573	0.186539859	7.371231991	TCONS_00159033	1	Mapk3	ENSMUST00000050201	ENSMUST00000050201	=	TSS94829;
XLOC_010335	1.373612851	0.336441446	4.08276943	TCONS_00033344	1	Plxdc1	CUFF.13026.2	ENSMUST00000017561	j	TSS19628;
XLOC_029086	1.371476664	0.234706104	5.843378764	TCONS_00086723	1	Hif1an	CUFF.37658.1	ENSMUST00000040455	j	TSS52269;
XLOC_004458	1.369176605	0.292732735	4.677224098	TCONS_00013521	1	Cited2	ENSMUST00000038107	ENSMUST00000038107	=	TSS8007;
XLOC_027295	1.367889977	0.136790849	9.999864693	TCONS_00081489	1	Fam53c	ENSMUST00000049281	ENSMUST00000049281	=	TSS49062;
XLOC_021248	1.367710641	0.221126571	6.185193562	TCONS_00063529	1	Gm10337	ENSMUST00000096145	ENSMUST00000096145	=	TSS38259;
XLOC_035527	1.366750379	0.265372945	5.150300387	TCONS_00108050	1	Ubqln4	CUFF.46078.2	ENSMUST00000008748	j	TSS64710;
XLOC_050323	1.365355523	0.274796053	4.968614033	TCONS_00154284	1	Gm44710	ENSMUST00000208885	ENSMUST00000208885	=	TSS92087;
XLOC_021490	1.365082614	0.202698025	6.734562986	TCONS_00064190	1	Pabpc1	CUFF.24795.3	ENSMUST00000001809	j	TSS38669;
XLOC_008033	1.36505847	0.260653958	5.237052529	TCONS_00024318	1	Sar1b	ENSMUST00000020653	ENSMUST00000020653	=	TSS14562;
XLOC_060497	1.363813495	0.312206185	4.368310306	TCONS_00188184	1	Snap91	CUFF.73851.1	ENSMUST00000074468	j	TSS111629;
XLOC_006090	1.363695177	0.274557662	4.966880794	TCONS_00018998	1	Foxo3	CUFF.6442.2	ENSMUST00000105502	o	TSS11231;
XLOC_018425	1.362954936	0.191050814	7.133991762	TCONS_00055377	1	AC151836.1	ENSMUST00000181856	ENSMUST00000228730	=	TSS33253;
XLOC_056292	1.358392678	0.258253968	5.2599102	TCONS_00174022	1	Terf2ip	CUFF.70283.1	ENSMUST00000052138	j	TSS103462;
XLOC_009520	1.352794312	0.287521927	4.705012686	TCONS_00030281	1	Lsm11	CUFF.10477.2	ENSMUST00000062458	=	TSS17897;
XLOC_003026	1.351970376	0.32507524	4.158946027	TCONS_00009953	1	Shisa4	ENSMUST00000041240	ENSMUST00000041240	=	TSS5778;
XLOC_002685	1.351891886	0.281036652	4.810375712	TCONS_00008793	1	Arl4c	ENSMUST00000051236	ENSMUST00000051236	=	TSS5098;
XLOC_039127	1.349889227	0.330205107	4.088032554	TCONS_00118399	1	Ift74	ENSMUST00000107104	ENSMUST00000107104	=	TSS70958;
XLOC_010093	1.349675585	0.332215049	4.06265637	TCONS_00032452	1	Asic2	CUFF.12167.1	ENSMUST00000021045	o	TSS19118;
XLOC_021712	1.348922755	0.212360592	6.352038969	TCONS_00064964	1	Lynx1	CUFF.25616.1	ENSMUST00000023259	j	TSS39113;
XLOC_035990	1.348300127	0.198838566	6.780878363	TCONS_00109794	1	Gm4332	ENSMUST00000196114	ENSMUST00000196114	=	TSS65674;
XLOC_032093	1.346383329	0.288569772	4.665711584	TCONS_00097075	1	Cstf1	CUFF.44015.1	ENSMUST00000116375	j	TSS58284;
XLOC_010284	1.340369493	0.278369716	4.815069372	TCONS_00033151	1	Atp5g1	ENSMUST00000090541	ENSMUST00000090541	=	TSS19523;
XLOC_036589	1.340070178	0.322940632	4.149586784	TCONS_00111673	1	Trpc3	CUFF.45034.2	ENSMUST00000029271	j	TSS66760;
XLOC_043192	1.338147275	0.288444966	4.639177073	TCONS_00131605	1	Crybb1	ENSMUST00000031286	ENSMUST00000031286	=	TSS78838;
XLOC_020671	1.337761374	0.303307801	4.410573588	TCONS_00061380	1	Gm28221	ENSMUST00000185617	ENSMUST00000185617	=	TSS37013;
XLOC_039765	1.333159025	0.211695921	6.297518712	TCONS_00121081	1	Gm13127	ENSMUST00000118978	ENSMUST00000118978	=	TSS72479;
XLOC_054472	1.321070525	0.279613367	4.724632951	TCONS_00168897	1	Cend1	CUFF.66636.1	ENSMUST00000164387	j	TSS100340;
XLOC_020006	1.318048619	0.317143142	4.156005423	TCONS_00060181	1	Tmtc4	CUFF.23977.5	ENSMUST00000126494	=	TSS36116;
XLOC_058833	1.317617456	0.244800517	5.382412877	TCONS_00181667	1	Rora	ENSMUST00000140351	ENSMUST00000140351	=	TSS108040;
XLOC_054372	1.312517269	0.192343528	6.823818227	TCONS_00168444	1	1500002F19Rik	ENSMUST00000209767	ENSMUST00000209767	=	TSS100137;
XLOC_030206	1.311559229	0.264607382	4.956623729	TCONS_00089960	1	Fam107b	CUFF.38340.1	ENSMUST00000226435	o	TSS54212;
XLOC_026378	1.310559394	0.260915343	5.022929589	TCONS_00079792	1	Rab31	CUFF.32530.1	ENSMUST00000070673	j	TSS47822;
XLOC_024672	1.309242394	0.204908707	6.389393663	TCONS_00073246	1	Gm1604b	ENSMUST00000089120	ENSMUST00000089120	=	TSS44192;
XLOC_008254	1.306205297	0.301550973	4.331623558	TCONS_00025130	1	Gas7	CUFF.11304.1	ENSMUST00000041611	o	TSS14991;
XLOC_005206	1.305322148	0.3230196	4.040999826	TCONS_00016280	1	Tcp11l2	ENSMUST00000020223	ENSMUST00000020223	=	TSS9596;
XLOC_029263	1.305226674	0.305797119	4.268276561	TCONS_00087457	1	Cst6	ENSMUST00000025764	ENSMUST00000025764	=	TSS52665;
XLOC_043266	1.303755609	0.21838548	5.969973878	TCONS_00131907	1	Rplp0	ENSMUST00000086519	ENSMUST00000086519	=	TSS79015;
XLOC_058704	1.303598472	0.3006836	4.335449193	TCONS_00181149	1	6030419C18Rik	CUFF.72731.1	ENSMUST00000217624	=	TSS107762;
XLOC_000037	1.303091297	0.198124137	6.577145605	TCONS_00000112	1	Pcmtd1	ENSMUST00000061280	ENSMUST00000061280	=	TSS66;
XLOC_009700	1.29884015	0.138054392	9.408176983	TCONS_00030848	1	Rnf187	CUFF.10991.1	ENSMUST00000094151	j	TSS18223;
XLOC_033207	1.295613319	0.298091831	4.34635634	TCONS_00101603	1	Mapk8ip1	CUFF.41297.1	ENSMUST00000111279	j	TSS60773;
XLOC_029365	1.294316749	0.318719998	4.060983803	TCONS_00087877	1	Dagla	CUFF.36429.4	ENSMUST00000039327	j	TSS52887;
XLOC_036251	1.292001115	0.15027067	8.597826304	TCONS_00110667	1	Ssx2ip	CUFF.47950.1	ENSMUST00000106149	j	TSS66192;
XLOC_008779	1.291243207	0.180046666	7.17171406	TCONS_00027379	1	Ppp1r1b	ENSMUST00000078694	ENSMUST00000078694	=	TSS16255;
XLOC_060283	1.290349937	0.209626243	6.155479	TCONS_00187515	1	Tpm1	ENSMUST00000113696	ENSMUST00000113696	=	TSS111248;
XLOC_031518	1.290216562	0.320217597	4.029186949	TCONS_00094827	1	B2m	ENSMUST00000102476	ENSMUST00000102476	=	TSS57044;
XLOC_040637	1.290025997	0.189041984	6.82401849	TCONS_00123974	1	Plaa	CUFF.50151.4	ENSMUST00000107107	j	TSS74095;
XLOC_005141	1.286909887	0.316671366	4.06386565	TCONS_00016057	1	Tbxa2r	ENSMUST00000220312	ENSMUST00000220312	=	TSS9459;
XLOC_036096	1.285473384	0.21167922	6.072742438	TCONS_00110100	1	Casp6	ENSMUST00000029626	ENSMUST00000029626	=	TSS65870;
XLOC_028990	1.283216689	0.300073727	4.27633803	TCONS_00086362	1	Fas	ENSMUST00000112472	ENSMUST00000112472	=	TSS52054;
XLOC_003501	1.281305194	0.268437986	4.773188829	TCONS_00011774	1	Coq8a	ENSMUST00000170472	ENSMUST00000170472	=	TSS6755;
XLOC_042389	1.279692702	0.159416632	8.027347483	TCONS_00128956	1	Depdc5	CUFF.53540.1	ENSMUST00000087897	o	TSS77241;
XLOC_045175	1.279191947	0.30641012	4.17477056	TCONS_00139260	1	Limk1	CUFF.56709.2	ENSMUST00000134093	j	TSS83091;
XLOC_008281	1.276786935	0.211529517	6.035975278	TCONS_00025261	1	Vamp2	ENSMUST00000021273	ENSMUST00000021273	=	TSS15062;
XLOC_008109	1.273927566	0.229790749	5.543859234	TCONS_00024651	1	Larp1	CUFF.10945.2	ENSMUST00000178636	j	TSS14729;
XLOC_009222	1.268284195	0.300981089	4.213833498	TCONS_00029332	1	Polm	ENSMUST00000109837	ENSMUST00000109837	=	TSS17334;
XLOC_010328	1.266438089	0.304987244	4.152429702	TCONS_00033324	1	Cwc25	ENSMUST00000124356	ENSMUST00000124356	=	TSS19616;
XLOC_009212	1.265528548	0.156188163	8.102589344	TCONS_00029288	1	Emid1	ENSMUST00000132328	ENSMUST00000132328	=	TSS17312;
XLOC_037202	1.264462433	0.271364292	4.659649307	TCONS_00113475	1	Snx27	CUFF.46343.2	ENSMUST00000029783	j	TSS67838;
XLOC_044666	1.264378351	0.218529306	5.785852594	TCONS_00136955	1	Ccni	CUFF.55049.1	ENSMUST00000058550	j	TSS81885;
XLOC_045176	1.263460214	0.311596318	4.054798274	TCONS_00139269	1	Eln	CUFF.56712.2	ENSMUST00000015138	j	TSS83095;
XLOC_018714	1.261595061	0.299941791	4.206132986	TCONS_00056116	1	Gm16835	ENSMUST00000140488	ENSMUST00000140488	=	TSS33732;
XLOC_040226	1.258997757	0.179681032	7.006848415	TCONS_00122528	1	Dctn3	CUFF.48950.1	ENSMUST00000030158	j	TSS73310;
XLOC_040225	1.256464059	0.224385897	5.599567868	TCONS_00122521	1	Fam219a	ENSMUST00000108049	ENSMUST00000108049	=	TSS73308;
XLOC_059332	1.255325925	0.215845509	5.815853812	TCONS_00183763	1	Map4	ENSMUST00000035055	ENSMUST00000035055	=	TSS109185;
XLOC_031974	1.253221091	0.249856643	5.015760541	TCONS_00096651	1	Gdap1l1	ENSMUST00000109420	ENSMUST00000109420	=	TSS58045;
XLOC_044721	1.252388438	0.212020289	5.906927328	TCONS_00137167	1	Gm19620	ENSMUST00000195972	ENSMUST00000195972	=	TSS82001;
XLOC_045183	1.251786524	0.22130122	5.656482699	TCONS_00139284	1	Abhd11os	ENSMUST00000136022	ENSMUST00000136022	=	TSS83106;
XLOC_062980	1.249012586	0.297822307	4.193818113	TCONS_00194314	1	Map7d2	CUFF.77649.1	ENSMUST00000112471	j	TSS115493;
XLOC_035864	1.24858458	0.289718845	4.309642266	TCONS_00109380	1	Kcnd3	CUFF.46898.1	ENSMUST00000118360	j	TSS65446;
XLOC_056925	1.247562031	0.273409916	4.562972881	TCONS_00176042	1	Klhl2	CUFF.68461.2	ENSMUST00000034017	j	TSS104600;
XLOC_022782	1.24721947	0.213863356	5.831852142	TCONS_00067608	1	Mkl2	CUFF.27725.1	ENSMUST00000009713	j	TSS40798;
XLOC_030627	1.246423093	0.24034441	5.185987455	TCONS_00091406	1	Tbc1d13	ENSMUST00000136183	ENSMUST00000136183	=	TSS55049;
XLOC_004892	1.245435551	0.283008096	4.400706437	TCONS_00014857	1	Slc25a16	ENSMUST00000044977	ENSMUST00000044977	=	TSS8822;
XLOC_028648	1.245291458	0.284548384	4.376378593	TCONS_00085038	1	Pitpnm1	CUFF.36016.4	ENSMUST00000049658	j	TSS51319;
XLOC_040971	1.23889547	0.187181445	6.6186874	TCONS_00125149	1	Akirin1	ENSMUST00000102636	ENSMUST00000102636	=	TSS74811;
XLOC_050037	1.2311404	0.277549178	4.435755886	TCONS_00153405	1	Gm42372	ENSMUST00000206129	ENSMUST00000206129	=	TSS91567;
XLOC_039840	1.230895328	0.242700355	5.071666769	TCONS_00121242	1	Fbxo2	ENSMUST00000047951	ENSMUST00000047951	=	TSS72586;
XLOC_009458	1.228310662	0.296450331	4.143394468	TCONS_00030069	1	Npm1	CUFF.10220.1	ENSMUST00000075641	j	TSS17774;
XLOC_043479	1.225420162	0.281119313	4.359074976	TCONS_00132845	1	Rabgef1	CUFF.56492.3	ENSMUST00000119797	j	TSS79547;
XLOC_039515	1.220961255	0.2496093	4.891489432	TCONS_00120068	1	Rnf19b	ENSMUST00000168461	ENSMUST00000168461	=	TSS71917;
XLOC_031061	1.214826593	0.275879223	4.403472572	TCONS_00093051	1	Itga4	ENSMUST00000155105	ENSMUST00000155105	=	TSS56007;
XLOC_046513	1.214243997	0.196510588	6.179025825	TCONS_00142718	1	Snx10	ENSMUST00000049152	ENSMUST00000049152	=	TSS85264;
XLOC_064372	1.212773424	0.286001159	4.240449332	TCONS_00198076	1	Tmsb4x	CUFF.77799.1	ENSMUST00000112175	j	TSS117726;
XLOC_044951	1.208138453	0.220589872	5.476853684	TCONS_00138181	1	Pebp1	CUFF.55972.1	ENSMUST00000111973	j	TSS82534;
XLOC_015728	1.207322117	0.140939192	8.566262503	TCONS_00047978	1	Rala	ENSMUST00000009003	ENSMUST00000009003	=	TSS28766;
XLOC_023501	1.205891042	0.192768005	6.255659713	TCONS_00070626	1	Gp1bb	ENSMUST00000167388	ENSMUST00000167388	=	TSS42395;
XLOC_062781	1.205827556	0.253551461	4.755750765	TCONS_00193815	1	Prps1	ENSMUST00000155235	ENSMUST00000155235	=	TSS115164;
XLOC_037237	1.20517396	0.279534852	4.311354918	TCONS_00113628	1	Mrps21	CUFF.46449.2	ENSMUST00000067298	j	TSS67916;
XLOC_029765	1.199962754	0.241210604	4.97475126	TCONS_00089355	1	Ablim1	CUFF.38109.1	ENSMUST00000079360	j	TSS53716;
XLOC_041213	1.198911427	0.243491622	4.923830309	TCONS_00126032	1	Pink1	ENSMUST00000105816	ENSMUST00000105816	=	TSS75334;
XLOC_038438	1.198051396	0.28495828	4.204304557	TCONS_00116512	1	Sdcbp	ENSMUST00000029912	ENSMUST00000029912	=	TSS69798;
XLOC_057002	1.197464972	0.230943174	5.185106576	TCONS_00176332	1	Mpv17l2	CUFF.68695.2	ENSMUST00000038626	j	TSS104757;
XLOC_032238	1.19687695	0.265610259	4.506139763	TCONS_00097667	1	Meig1	CUFF.38328.1	ENSMUST00000115084	j	TSS58615;
XLOC_015188	1.19209547	0.270016526	4.414898185	TCONS_00046258	1	Gm36529	ENSMUST00000222495	ENSMUST00000222495	=	TSS27778;
XLOC_040208	1.187836802	0.268150638	4.429736991	TCONS_00122457	1	Bag1	ENSMUST00000108089	ENSMUST00000108089	=	TSS73268;
XLOC_058786	1.183999058	0.263438815	4.494398663	TCONS_00181442	1	Dennd4a	CUFF.72947.1	ENSMUST00000038890	j	TSS107927;
XLOC_043114	1.179064962	0.278553433	4.232814333	TCONS_00131294	1	Gm43592	ENSMUST00000196922	ENSMUST00000196922	=	TSS78681;
XLOC_044785	1.177981593	0.242831763	4.851019408	TCONS_00137443	1	Gm42902	CUFF.55382.3	ENSMUST00000199508	j	TSS82139;
XLOC_024904	1.176465593	0.262415787	4.483211953	TCONS_00074031	1	Mettl26	ENSMUST00000110456	ENSMUST00000110456	=	TSS44645;
XLOC_042454	1.17521159	0.226523115	5.188042685	TCONS_00129293	1	Ppp2r2c	CUFF.53760.1	ENSMUST00000031003	j	TSS77427;
XLOC_030678	1.172239801	0.194330985	6.032181636	TCONS_00091773	1	Fam102a	ENSMUST00000136816	ENSMUST00000136816	=	TSS55237;
XLOC_020971	1.171535338	0.259262451	4.518723531	TCONS_00062361	1	Micall1	CUFF.25957.1	ENSMUST00000040320	j	TSS37590;
XLOC_045280	1.167250197	0.279367331	4.178191455	TCONS_00139781	1	Adap1	CUFF.56967.2	ENSMUST00000110865	j	TSS83361;
XLOC_053800	1.16713622	0.213166095	5.475243229	TCONS_00166221	1	Ppme1	ENSMUST00000207634	ENSMUST00000207634	=	TSS98898;
XLOC_031685	1.162279723	0.227462657	5.109760608	TCONS_00095501	1	Btbd3	ENSMUST00000091556	ENSMUST00000091556	=	TSS57414;
XLOC_043728	1.161819608	0.140958378	8.242288411	TCONS_00133844	1	Wasf3	ENSMUST00000016143	ENSMUST00000016143	=	TSS80100;
XLOC_044884	1.160967593	0.24961803	4.6509765	TCONS_00137895	1	Cmklr1	CUFF.55751.2	ENSMUST00000142854	=	TSS82367;
XLOC_045209	1.158493648	0.226860615	5.10663187	TCONS_00139377	1	Ywhag	CUFF.56777.1	ENSMUST00000198270	j	TSS83156;
XLOC_024975	1.157582808	0.288705392	4.009564211	TCONS_00074414	1	Zfand3	CUFF.31315.1	ENSMUST00000226208	o	TSS44830;
XLOC_031510	1.155976605	0.115900469	9.973873377	TCONS_00094776	1	Serf2	ENSMUST00000139253	ENSMUST00000139253	=	TSS57020;
XLOC_041561	1.155485903	0.23167277	4.987577531	TCONS_00127283	1		CUFF.48430.1		u	TSS76049;
XLOC_006036	1.152576957	0.286476845	4.023281377	TCONS_00018784	1	Marcks	CUFF.6228.1	ENSMUST00000092584	o	TSS11124;
XLOC_005270	1.14867532	0.226282369	5.076291741	TCONS_00016495	1	Uhrf1bp1l	ENSMUST00000020112	ENSMUST00000020112	=	TSS9731;
XLOC_032315	1.142427531	0.218263674	5.234162468	TCONS_00097982	1	Mindy3	CUFF.38590.11	ENSMUST00000028105	j	TSS58797;
XLOC_009138	1.141440646	0.281207866	4.059063726	TCONS_00028876	1	Ccdc137	ENSMUST00000058370	ENSMUST00000058370	=	TSS17113;
XLOC_008917	1.140834664	0.20042538	5.692066857	TCONS_00027939	1	Mapt	CUFF.13429.4	ENSMUST00000106989	j	TSS16580;
XLOC_005969	1.138786986	0.179611588	6.340275699	TCONS_00018614	1	Hint3	CUFF.6072.1	ENSMUST00000160646	j	TSS11022;
XLOC_056631	1.134442682	0.149850462	7.57049837	TCONS_00175060	1	Tacc1	CUFF.67533.2	ENSMUST00000209441	=	TSS104051;
XLOC_051631	1.132785771	0.169910563	6.666953178	TCONS_00158915	1	Lcmt1	ENSMUST00000206721	ENSMUST00000206721	=	TSS94765;
XLOC_031801	1.132636205	0.214771597	5.273677805	TCONS_00095868	1	Fkbp1a	CUFF.43336.3	ENSMUST00000143230	=	TSS57647;
XLOC_022762	1.132624523	0.152169021	7.443200436	TCONS_00067544	1	Clec16a	CUFF.27620.11	ENSMUST00000066345	j	TSS40762;
XLOC_058551	1.131237172	0.161275903	7.01429755	TCONS_00180527	1	Sik3	CUFF.72120.7	ENSMUST00000126865	j	TSS107411;
XLOC_061832	1.129288898	0.281553366	4.010923091	TCONS_00191428	1	Cdk16	ENSMUST00000115364	ENSMUST00000115364	=	TSS113691;
XLOC_015060	1.124946874	0.271516638	4.143196825	TCONS_00045981	1	Habp4	ENSMUST00000221904	ENSMUST00000221904	=	TSS27599;
XLOC_000237	1.121141613	0.184912376	6.063096692	TCONS_00000642	1	Plekhb2	ENSMUST00000156687	ENSMUST00000156687	=	TSS393;
XLOC_001204	1.119164577	0.246033262	4.548834451	TCONS_00003960	1	Adipor1	ENSMUST00000027727	ENSMUST00000027727	=	TSS2272;
XLOC_041389	1.117530332	0.251434549	4.444617236	TCONS_00126713	1	Spsb1	CUFF.52370.1	ENSMUST00000038562	j	TSS75720;
XLOC_033476	1.112197317	0.206115924	5.395979579	TCONS_00102665	1	Frmd5	CUFF.42185.7	ENSMUST00000138157	j	TSS61366;
XLOC_013075	1.111377978	0.266978256	4.162803347	TCONS_00041241	1	Vcpkmt	CUFF.15624.1	ENSMUST00000058639	j	TSS24477;
XLOC_004968	1.108924138	0.23718562	4.675343037	TCONS_00015155	1	Zwint	CUFF.7208.2	ENSMUST00000160337	=	TSS8991;
XLOC_023532	1.107023885	0.190485227	5.811599677	TCONS_00070691	1	Parl	CUFF.28085.1	ENSMUST00000136252	j	TSS42445;
XLOC_023623	1.105708532	0.197855608	5.58846191	TCONS_00071013	1	Nrros	CUFF.28567.1	ENSMUST00000150250	=	TSS42641;
XLOC_030681	1.103382764	0.255867103	4.312327571	TCONS_00091790	1	St6galnac4	ENSMUST00000102818	ENSMUST00000102818	=	TSS55247;
XLOC_026597	1.101669848	0.191144934	5.763531512	TCONS_00080399	1		CUFF.30263.1		u	TSS48197;
XLOC_013077	1.100718077	0.250836948	4.38818159	TCONS_00041246	1	Sos2	CUFF.15627.4	ENSMUST00000183277	=	TSS24479;
XLOC_002736	1.100393546	0.222288341	4.950298073	TCONS_00008964	1	Kif1a	CUFF.2324.1	ENSMUST00000190723	j	TSS5189;
XLOC_010496	1.09990085	0.120025076	9.163925461	TCONS_00033961	1	Slc25a39	CUFF.13305.14	ENSMUST00000018821	j	TSS19966;
XLOC_033660	1.098471725	0.133860801	8.206074669	TCONS_00103446	1	Snx5	ENSMUST00000028909	ENSMUST00000028909	=	TSS61778;
XLOC_053000	1.09805264	0.235045503	4.671659859	TCONS_00164131	1	Cyth2	CUFF.63650.4	ENSMUST00000211783	=	TSS97586;
XLOC_008371	1.096622231	0.254480645	4.309255937	TCONS_00025783	1	Camkk1	ENSMUST00000155720	ENSMUST00000155720	=	TSS15334;
XLOC_048973	1.095310213	0.260517039	4.204370723	TCONS_00151123	1	BC035044	CUFF.61394.1	ENSMUST00000160290	j	TSS90016;
XLOC_020969	1.091462429	0.180410142	6.049895069	TCONS_00062349	1	Sh3bp1	ENSMUST00000134703	ENSMUST00000134703	=	TSS37584;
XLOC_039398	1.090709577	0.157637408	6.919103709	TCONS_00119648	1	Scmh1	ENSMUST00000134375	ENSMUST00000134375	=	TSS71658;
XLOC_028911	1.090191492	0.236641905	4.606924929	TCONS_00086092	1	Klf9	CUFF.36769.1	ENSMUST00000036884	j	TSS51889;
XLOC_007690	1.08912406	0.115360174	9.441075033	TCONS_00023242	1	Ppia	ENSMUST00000132846	ENSMUST00000132846	=	TSS13905;
XLOC_010659	1.086665084	0.178975685	6.0715794	TCONS_00034753	1	H3f3b	CUFF.13756.1	ENSMUST00000106454	j	TSS20384;
XLOC_063869	1.086534291	0.211646719	5.133716683	TCONS_00196771	1	Gm14840	ENSMUST00000122135	ENSMUST00000122135	=	TSS116950;
XLOC_041006	1.082353738	0.130834284	8.272707294	TCONS_00125248	1	Map7d1	CUFF.51373.1	ENSMUST00000122129	j	TSS74873;
XLOC_050904	1.082193908	0.236527696	4.575336964	TCONS_00156381	1	Lins1	ENSMUST00000153007	ENSMUST00000153007	=	TSS93246;
XLOC_062732	1.079362797	0.177927325	6.066312747	TCONS_00193682	1	Tceal9	ENSMUST00000048687	ENSMUST00000048687	=	TSS115079;
XLOC_014331	1.078984357	0.17491601	6.168585463	TCONS_00043931	1	Pitrm1	CUFF.17553.2	ENSMUST00000222485	j	TSS26319;
XLOC_028685	1.075235012	0.142542503	7.543258968	TCONS_00085205	1	Cfl1	ENSMUST00000209469	ENSMUST00000209469	=	TSS51394;
XLOC_043773	1.070728874	0.183958591	5.820488569	TCONS_00133984	1	Uspl1	CUFF.57441.1	ENSMUST00000122160	j	TSS80185;
XLOC_029659	1.070302497	0.242319214	4.416911386	TCONS_00088938	1	Got1	ENSMUST00000026196	ENSMUST00000026196	=	TSS53488;
XLOC_002033	1.066148359	0.252075275	4.229484071	TCONS_00006600	1	Smap1	CUFF.425.4	ENSMUST00000149737	j	TSS3838;
XLOC_010508	1.066008727	0.140990267	7.560867496	TCONS_00034033	1	Ccdc43	ENSMUST00000092569	ENSMUST00000092569	=	TSS19997;
XLOC_018205	1.065942733	0.143642183	7.420819625	TCONS_00054544	1	Abhd4	ENSMUST00000180359	ENSMUST00000180359	=	TSS32794;
XLOC_045410	1.065628879	0.253590254	4.202168106	TCONS_00140325	1	Hmgb1	CUFF.57440.1	ENSMUST00000202133	j	TSS83665;
XLOC_032815	1.060608159	0.208776356	5.080116258	TCONS_00100356	1	Stk39	CUFF.40487.1	ENSMUST00000102715	j	TSS60001;
XLOC_039908	1.0580245	0.16059988	6.587953224	TCONS_00121495	1	Cep104	ENSMUST00000047497	ENSMUST00000047497	=	TSS72739;
XLOC_045226	1.056522418	0.15218643	6.942290566	TCONS_00139472	1	Ap1s1	CUFF.56822.1	ENSMUST00000111080	j	TSS83204;
XLOC_022901	1.055201323	0.232175338	4.544846716	TCONS_00068245	1	Senp2	ENSMUST00000023561	ENSMUST00000023561	=	TSS41098;
XLOC_004618	1.05499903	0.228099679	4.62516665	TCONS_00014035	1	Tspyl4	ENSMUST00000047935	ENSMUST00000047935	=	TSS8321;
XLOC_005139	1.05486289	0.243939702	4.324277198	TCONS_00016037	1	Pip5k1c	ENSMUST00000163075	ENSMUST00000163075	=	TSS9449;
XLOC_049176	1.053558561	0.193011068	5.458539613	TCONS_00151640	1	Ldhb	ENSMUST00000130817	ENSMUST00000130817	=	TSS90331;
XLOC_005634	1.04443024	0.21233149	4.918866437	TCONS_00017539	1	R3hdm2	ENSMUST00000170164	ENSMUST00000170164	=	TSS10371;
XLOC_039323	1.04175185	0.164977413	6.314511992	TCONS_00119328	1	1700042G07Rik	ENSMUST00000106492	ENSMUST00000106492	=	TSS71486;
XLOC_025056	1.039820453	0.259599059	4.005486212	TCONS_00074764	1	Tap2	CUFF.31603.1	ENSMUST00000025197	j	TSS45024;
XLOC_021955	1.037511472	0.222877547	4.65507399	TCONS_00065942	1	Sbf1	ENSMUST00000123791	ENSMUST00000123791	=	TSS39653;
XLOC_054275	1.03749401	0.150460464	6.895459303	TCONS_00168080	1	Tbc1d10b	CUFF.66160.1	ENSMUST00000120705	j	TSS99919;
XLOC_006332	1.036432146	0.198153685	5.230445987	TCONS_00019727	1	Gm7097	ENSMUST00000161841	ENSMUST00000161841	=	TSS11667;
XLOC_050079	1.035461161	0.21841124	4.740878549	TCONS_00153481	1	Sympk	CUFF.62519.4	ENSMUST00000023882	j	TSS91617;
XLOC_003366	1.033163566	0.205419096	5.029540032	TCONS_00011248	1	Uhmk1	ENSMUST00000150821	ENSMUST00000150821	=	TSS6475;
XLOC_058609	1.031550368	0.206868802	4.986495595	TCONS_00180776	1	Arhgap20	CUFF.72364.1	ENSMUST00000065496	j	TSS107542;
XLOC_043360	1.030220507	0.222514164	4.629909791	TCONS_00132322	1	Vps29	CUFF.56179.4	ENSMUST00000111729	=	TSS79258;
XLOC_009653	1.029401402	0.208823738	4.929522912	TCONS_00030718	1	Atox1	ENSMUST00000108857	ENSMUST00000108857	=	TSS18142;
XLOC_009164	1.029155931	0.171027744	6.01747942	TCONS_00029016	1	Narf	CUFF.14123.1	ENSMUST00000103015	j	TSS17176;
XLOC_056206	1.028837483	0.118708528	8.666921399	TCONS_00173582	1	Ripor1	ENSMUST00000043531	ENSMUST00000043531	=	TSS103246;
XLOC_008376	1.02720811	0.249166401	4.122578746	TCONS_00025804	1	Tax1bp3	ENSMUST00000040687	ENSMUST00000040687	=	TSS15342;
XLOC_063725	1.025319934	0.247910219	4.13585184	TCONS_00196386	1	Dmd	CUFF.76501.1	ENSMUST00000114000	x	TSS116714;
XLOC_052645	1.024274343	0.198987506	5.147430439	TCONS_00162590	1	Psmd8	CUFF.62940.2	ENSMUST00000059642	j	TSS96783;
XLOC_000761	1.020373851	0.153725339	6.637642557	TCONS_00002547	1	Ptma	ENSMUST00000045897	ENSMUST00000045897	=	TSS1440;
XLOC_009165	1.020215427	0.17157546	5.946161692	TCONS_00029020	1	Foxk2	ENSMUST00000106113	ENSMUST00000106113	=	TSS17179;
XLOC_011383	1.017559987	0.239086146	4.256039097	TCONS_00036233	1	Laptm4a	CUFF.14409.1	ENSMUST00000020909	j	TSS21410;
XLOC_036012	1.016228417	0.227396068	4.468979719	TCONS_00109870	1	Gclm	CUFF.47335.5	ENSMUST00000178826	j	TSS65722;
XLOC_031695	1.015608647	0.194320723	5.226455676	TCONS_00095533	1	Macrod2	CUFF.42976.2	ENSMUST00000124403	=	TSS57432;
XLOC_062690	1.013820786	0.160487361	6.317137866	TCONS_00193531	1	Cstf2	CUFF.77182.3	ENSMUST00000033609	j	TSS115005;
XLOC_059763	1.01221699	0.211812902	4.778825931	TCONS_00185482	1	Acad8	ENSMUST00000129490	ENSMUST00000129490	=	TSS110118;
XLOC_032462	1.012101122	0.201783273	5.015783053	TCONS_00098682	1	Inpp5e	ENSMUST00000145701	ENSMUST00000145701	=	TSS59142;
XLOC_057170	1.006592278	0.184223779	5.463964997	TCONS_00176950	1	Asna1	ENSMUST00000064314	ENSMUST00000064314	=	TSS105098;
XLOC_021933	1.006330447	0.17648603	5.702040264	TCONS_00065842	1	Cerk	CUFF.26468.1	ENSMUST00000156546	=	TSS39590;
XLOC_058593	1.005458151	0.192403688	5.225773795	TCONS_00180693	1	Timm8b	ENSMUST00000044051	ENSMUST00000044051	=	TSS107502;
XLOC_010656	1.003114404	0.181663896	5.521814892	TCONS_00034743	1	Grb2	ENSMUST00000106499	ENSMUST00000106499	=	TSS20378;
XLOC_054482	1.001921078	0.227839431	4.39748762	TCONS_00168982	1	Tollip	ENSMUST00000055819	ENSMUST00000055819	=	TSS100372;
XLOC_025804	0.999678676	0.228710126	4.370941918	TCONS_00077259	1	Pdpk1	CUFF.30984.5	ENSMUST00000102927	j	TSS46520;
XLOC_048485	0.999393781	0.17431392	5.733298758	TCONS_00149106	1	Exoc6b	ENSMUST00000160197	ENSMUST00000160197	=	TSS88948;
XLOC_036707	0.999391395	0.195551816	5.110621898	TCONS_00111928	1	Setd7	ENSMUST00000037141	ENSMUST00000037141	=	TSS66922;
XLOC_043229	0.997429471	0.203588717	4.89923748	TCONS_00131723	1	Ube3b	CUFF.55796.1	ENSMUST00000074002	j	TSS78916;
XLOC_031546	0.997367832	0.218874211	4.556808343	TCONS_00094924	1	Eid1	ENSMUST00000164756	ENSMUST00000164756	=	TSS57101;
XLOC_048901	0.996884422	0.19975353	4.990572253	TCONS_00150825	1	Ptms	CUFF.61234.2	ENSMUST00000032216	j	TSS89863;
XLOC_015164	0.993914529	0.245347674	4.051045251	TCONS_00046209	1	1700001L19Rik	ENSMUST00000022007	ENSMUST00000022007	=	TSS27745;
XLOC_028903	0.990527137	0.241141098	4.10766619	TCONS_00086056	1	Aldh1a1	ENSMUST00000224807	ENSMUST00000224807	=	TSS51870;
XLOC_044007	0.989794053	0.237453417	4.168371486	TCONS_00134782	1	Prkag2	CUFF.53249.1	ENSMUST00000030784	j	TSS80647;
XLOC_058713	0.989508985	0.239052914	4.139288534	TCONS_00181198	1	Parp6	CUFF.72777.3	ENSMUST00000217195	=	TSS107785;
XLOC_020449	0.988643833	0.107371792	9.207668157	TCONS_00060676	1	Oxct1	ENSMUST00000110690	ENSMUST00000110690	=	TSS36585;
XLOC_059462	0.987774274	0.111305499	8.87444274	TCONS_00184361	1	Trak1	ENSMUST00000211301	ENSMUST00000211301	=	TSS109522;
XLOC_027446	0.987386187	0.216505868	4.560551608	TCONS_00082039	1		CUFF.34892.2		u	TSS49387;
XLOC_033453	0.984409088	0.220155245	4.47143145	TCONS_00102501	1	Zfp106	CUFF.42049.2	ENSMUST00000171215	=	TSS61283;
XLOC_005116	0.977274165	0.235048807	4.157749954	TCONS_00015862	1	Csnk1g2	CUFF.7574.1	ENSMUST00000085435	j	TSS9358;
XLOC_036070	0.974064253	0.22714173	4.288354466	TCONS_00110051	1	9830132P13Rik	CUFF.47532.1	ENSMUST00000198240	o	TSS65835;
XLOC_019737	0.972823092	0.204441591	4.758440222	TCONS_00059548	1	Gm4285	ENSMUST00000131222	ENSMUST00000131222	=	TSS35692;
XLOC_043217	0.97201313	0.2102208	4.623772379	TCONS_00131665	1	Iscu	ENSMUST00000026937	ENSMUST00000026937	=	TSS78877;
XLOC_045247	0.96849449	0.174331461	5.555477379	TCONS_00139612	1	Agfg2	ENSMUST00000031736	ENSMUST00000031736	=	TSS83276;
XLOC_044106	0.968442912	0.22447851	4.314189862	TCONS_00135206	1	Ctbp1	CUFF.53569.1	ENSMUST00000202868	j	TSS80870;
XLOC_027308	0.967629509	0.192690991	5.021664503	TCONS_00081576	1	Cxxc5	CUFF.34483.2	ENSMUST00000060722	j	TSS49095;
XLOC_012768	0.966479599	0.130739651	7.392398517	TCONS_00040461	1	Trappc12	ENSMUST00000168129	ENSMUST00000168129	=	TSS23987;
XLOC_051748	0.964407522	0.236086881	4.084968717	TCONS_00159547	1	Plekha1	CUFF.66344.3	ENSMUST00000120441	j	TSS95104;
XLOC_031592	0.964370416	0.213233704	4.522598424	TCONS_00095104	1	Ttl	CUFF.42556.1	ENSMUST00000035812	j	TSS57205;
XLOC_062912	0.964360387	0.223481858	4.315161837	TCONS_00194138	1	Hsd17b10	ENSMUST00000112617	ENSMUST00000112617	=	TSS115384;
XLOC_017698	0.961897723	0.233602648	4.117666186	TCONS_00053346	1	Parg	ENSMUST00000164137	ENSMUST00000164137	=	TSS32009;
XLOC_003603	0.960807941	0.231224795	4.155298062	TCONS_00012161	1	Smyd2	ENSMUST00000027897	ENSMUST00000027897	=	TSS6980;
XLOC_014854	0.960537285	0.21457318	4.476502072	TCONS_00045274	1	Ninj1	CUFF.18574.1	ENSMUST00000120733	o	TSS27201;
XLOC_031501	0.95600362	0.206644504	4.626320097	TCONS_00094701	1	Ccndbp1	CUFF.42124.2	ENSMUST00000060455	j	TSS56988;
XLOC_031906	0.95198552	0.199368856	4.774996156	TCONS_00096345	1	Dlgap4	ENSMUST00000109567	ENSMUST00000109567	=	TSS57890;
XLOC_032218	0.94870788	0.199829416	4.747588704	TCONS_00097547	1	Tpd52l2	CUFF.44282.3	ENSMUST00000108799	j	TSS58558;
XLOC_039674	0.943602029	0.224512713	4.202889071	TCONS_00120814	1	Capzb	ENSMUST00000102508	ENSMUST00000102508	=	TSS72316;
XLOC_055806	0.943193913	0.208420943	4.525427724	TCONS_00172067	1	Dda1	ENSMUST00000147843	ENSMUST00000147843	=	TSS102395;
XLOC_011340	0.941391233	0.227723335	4.133925206	TCONS_00036052	1	Dnajc27	ENSMUST00000020986	ENSMUST00000020986	=	TSS21316;
XLOC_057134	0.941081123	0.229355848	4.103148581	TCONS_00176799	1	2210011C24Rik	CUFF.69173.1	ENSMUST00000185457	j	TSS105017;
XLOC_060616	0.939509698	0.181212295	5.184580304	TCONS_00188591	1	Mrps22	ENSMUST00000035034	ENSMUST00000035034	=	TSS111853;
XLOC_014467	0.938904199	0.201085005	4.669190514	TCONS_00044244	1	Elmo1	CUFF.17791.1	ENSMUST00000072519	j	TSS26526;
XLOC_006406	0.937515422	0.210003938	4.464275437	TCONS_00020038	1	Fam207a	ENSMUST00000045454	ENSMUST00000045454	=	TSS11837;
XLOC_035501	0.936353416	0.217157202	4.311869042	TCONS_00107924	1	Hdgf	ENSMUST00000005017	ENSMUST00000005017	=	TSS64651;
XLOC_051230	0.93099588	0.207170762	4.493857484	TCONS_00157400	1	Rsf1	ENSMUST00000205536	ENSMUST00000205536	=	TSS93847;
XLOC_043418	0.926899166	0.151678688	6.110938728	TCONS_00132591	1	Gtf2h3	ENSMUST00000031333	ENSMUST00000031333	=	TSS79405;
XLOC_024685	0.92111108	0.224972897	4.094320209	TCONS_00073313	1	Pde10a	ENSMUST00000115715	ENSMUST00000115715	=	TSS44225;
XLOC_003521	0.918419097	0.196870675	4.665088365	TCONS_00011880	1	Wdr26	ENSMUST00000162819	ENSMUST00000162819	=	TSS6808;
XLOC_050337	0.918252666	0.166694064	5.508610465	TCONS_00154344	1	Sirt2	CUFF.62911.2	ENSMUST00000072965	j	TSS92125;
XLOC_060403	0.918115134	0.129106155	7.111319655	TCONS_00187945	1	Fbxo9	ENSMUST00000085311	ENSMUST00000085311	=	TSS111469;
XLOC_021839	0.91309588	0.18157906	5.028640846	TCONS_00065510	1	Sun2	CUFF.26043.1	ENSMUST00000046259	o	TSS39397;
XLOC_063227	0.910599346	0.117667184	7.738770606	TCONS_00195089	1	Zfp182	CUFF.75792.6	ENSMUST00000115334	j	TSS115927;
XLOC_027367	0.907388072	0.205866227	4.407658733	TCONS_00081807	1	Arhgap26	ENSMUST00000145090	ENSMUST00000145090	=	TSS49247;
XLOC_008034	0.90698043	0.163908911	5.533441855	TCONS_00024322	1	Ppp2ca	CUFF.10704.1	ENSMUST00000020608	j	TSS14563;
XLOC_040850	0.904764547	0.138752682	6.520699508	TCONS_00124649	1	Akr1a1	CUFF.50890.6	ENSMUST00000030455	j	TSS74519;
XLOC_057412	0.902470347	0.158527508	5.692831217	TCONS_00177838	1	Psmd7	CUFF.70076.1	ENSMUST00000044106	j	TSS105591;
XLOC_046168	0.900456063	0.206547433	4.35956066	TCONS_00141577	1	Ccdc136	ENSMUST00000132232	ENSMUST00000132232	=	TSS84617;
XLOC_010237	0.896476107	0.165300566	5.42330936	TCONS_00032935	1	Nme2	ENSMUST00000021217	ENSMUST00000021217	=	TSS19410;
XLOC_031059	0.89388409	0.174457316	5.123798256	TCONS_00093038	1	Ube2e3	ENSMUST00000124120	ENSMUST00000124120	=	TSS56000;
XLOC_060952	0.8920112	0.166594713	5.354378793	TCONS_00190159	1	Zdhhc3	ENSMUST00000140497	ENSMUST00000140497	=	TSS112659;
XLOC_020459	0.890613268	0.188895294	4.714851534	TCONS_00060710	1	Rpl37	CUFF.24159.1	ENSMUST00000045356	j	TSS36608;
XLOC_050321	0.887902468	0.208504796	4.258427062	TCONS_00154280	1	Rps16	ENSMUST00000082134	ENSMUST00000082134	=	TSS92083;
XLOC_034139	0.886383076	0.215615048	4.110951821	TCONS_00105220	1	Dnajc5	CUFF.44286.1	ENSMUST00000072334	x	TSS62743;
XLOC_033712	0.883621428	0.204919135	4.312049367	TCONS_00103576	1	C530025M09Rik	ENSMUST00000099264	ENSMUST00000099264	=	TSS61869;
XLOC_037090	0.882364497	0.214129203	4.120710686	TCONS_00113213	1	Il6ra	ENSMUST00000197679	ENSMUST00000197679	=	TSS67654;
XLOC_022039	0.878010505	0.170048019	5.163309224	TCONS_00066370	1	Arf3	CUFF.26955.1	ENSMUST00000053183	=	TSS39864;
XLOC_060191	0.875251744	0.208666918	4.194492119	TCONS_00187157	1	Bbs4	CUFF.72757.3	ENSMUST00000026265	j	TSS111047;
XLOC_010296	0.873520021	0.215361559	4.056062864	TCONS_00033180	1	Nfe2l1	ENSMUST00000167110	ENSMUST00000167110	=	TSS19542;
XLOC_033852	0.872384693	0.191143383	4.564032934	TCONS_00104124	1	Ndrg3	CUFF.43581.4	ENSMUST00000069600	j	TSS62145;
XLOC_000420	0.871635825	0.125394376	6.951155632	TCONS_00001259	1	Mob4	ENSMUST00000159311	ENSMUST00000159311	=	TSS756;
XLOC_038743	0.86784571	0.073869227	11.74840653	TCONS_00117413	1	Clta	CUFF.49086.3	ENSMUST00000107851	j	TSS70330;
XLOC_006103	0.865799295	0.207479495	4.172939098	TCONS_00019032	1	Sobp	CUFF.6476.2	ENSMUST00000040275	j	TSS11255;
XLOC_008436	0.859587365	0.128749923	6.676410691	TCONS_00026024	1	Ywhae	ENSMUST00000067664	ENSMUST00000067664	=	TSS15465;
XLOC_033189	0.855275151	0.134417651	6.362818772	TCONS_00101517	1	1110051M20Rik	CUFF.41137.1	ENSMUST00000064652	j	TSS60728;
XLOC_005653	0.853306497	0.183171322	4.658515791	TCONS_00017636	1	Ptges3	CUFF.9122.1	ENSMUST00000052798	j	TSS10422;
XLOC_001298	0.85231832	0.170163774	5.008811788	TCONS_00004267	1	Gm8856	ENSMUST00000185254	ENSMUST00000185254	=	TSS2446;
XLOC_009836	0.850103019	0.14153431	6.0063388	TCONS_00031405	1	Pfas	CUFF.11371.1	ENSMUST00000021282	o	TSS18539;
XLOC_037224	0.846318533	0.1918511	4.411330106	TCONS_00113571	1	Tnfaip8l2	ENSMUST00000013851	ENSMUST00000013851	=	TSS67890;
XLOC_047921	0.842958634	0.134810337	6.252922846	TCONS_00147637	1	Kdm7a	CUFF.58492.2	ENSMUST00000127036	=	TSS88011;
XLOC_006485	0.841100554	0.183793435	4.576336228	TCONS_00020389	1	Mbd3	ENSMUST00000142997	ENSMUST00000142997	=	TSS12016;
XLOC_032095	0.837930276	0.078342228	10.69576775	TCONS_00097086	1	Rtfdc1	ENSMUST00000029005	ENSMUST00000029005	=	TSS58290;
XLOC_062733	0.829876947	0.175112622	4.739104113	TCONS_00193684	1	Bex3	ENSMUST00000178632	ENSMUST00000178632	=	TSS115081;
XLOC_032219	0.828796762	0.093547412	8.859643941	TCONS_00097564	1	Dnajc5	CUFF.44285.4	ENSMUST00000116365	j	TSS58561;
XLOC_058085	0.827194616	0.177760957	4.653410012	TCONS_00178968	1	Mtmr2	ENSMUST00000034396	ENSMUST00000034396	=	TSS106440;
XLOC_031880	0.821485064	0.124143583	6.617217286	TCONS_00096202	1	Map1lc3a	ENSMUST00000029128	ENSMUST00000029128	=	TSS57818;
XLOC_009640	0.81999862	0.172359119	4.75750066	TCONS_00030650	1	Cdc42se2	CUFF.10850.1	ENSMUST00000064104	j	TSS18114;
XLOC_006529	0.819809053	0.081010865	10.11974194	TCONS_00020655	1	Gna11	CUFF.7666.1	ENSMUST00000146984	=	TSS12153;
XLOC_043129	0.818978448	0.192115498	4.262948358	TCONS_00131385	1	Gm10086	ENSMUST00000136334	ENSMUST00000136334	=	TSS78711;
XLOC_036171	0.817611529	0.139366145	5.866643779	TCONS_00110356	1	H2afz	ENSMUST00000041045	ENSMUST00000041045	=	TSS66019;
XLOC_047435	0.816701706	0.153148746	5.332735189	TCONS_00145971	1	Clec9a	CUFF.61405.1	ENSMUST00000058352	o	TSS87085;
XLOC_042884	0.816625994	0.19575653	4.171641131	TCONS_00130616	1	Dck	ENSMUST00000031311	ENSMUST00000031311	=	TSS78262;
XLOC_041199	0.81328971	0.150063957	5.419620569	TCONS_00126000	1	Cdc42	CUFF.51849.2	ENSMUST00000051477	j	TSS75309;
XLOC_025101	0.812857765	0.191299289	4.249141592	TCONS_00075041	1	Bag6	CUFF.31695.1	ENSMUST00000025250	=	TSS45169;
XLOC_058768	0.80423465	0.171339978	4.693794517	TCONS_00181384	1	Aagab	CUFF.72898.1	ENSMUST00000041551	j	TSS107895;
XLOC_002162	0.803520497	0.182220369	4.409608555	TCONS_00006945	1	Actr1b	CUFF.637.2	ENSMUST00000043951	j	TSS4059;
XLOC_027273	0.801255886	0.199470781	4.016908556	TCONS_00081428	1	Bin1	CUFF.34360.2	ENSMUST00000025239	j	TSS49025;
XLOC_011583	0.799643479	0.181170487	4.413762378	TCONS_00036743	1	Tssc1	ENSMUST00000221877	ENSMUST00000221877	=	TSS21737;
XLOC_062901	0.794941208	0.166602226	4.77149212	TCONS_00194068	1	Fam120c	CUFF.77463.1	ENSMUST00000073364	=	TSS115349;
XLOC_003705	0.793316395	0.181247636	4.376975125	TCONS_00012503	1		CUFF.190.1		u	TSS7176;
XLOC_008762	0.791909771	0.17122303	4.625019018	TCONS_00027322	1	Lasp1	CUFF.12989.1	ENSMUST00000043843	o	TSS16213;
XLOC_024839	0.79032399	0.196066968	4.030888003	TCONS_00073772	1	Hcfc1r1	ENSMUST00000180140	ENSMUST00000180140	=	TSS44494;
XLOC_048606	0.785919462	0.182561992	4.304945705	TCONS_00149598	1	Mrps25	CUFF.60099.1	ENSMUST00000140438	=	TSS89201;
XLOC_021493	0.783468683	0.139696455	5.608364802	TCONS_00064206	1	Ywhaz	CUFF.24801.1	ENSMUST00000022894	j	TSS38680;
XLOC_032949	0.782114217	0.137447941	5.690257796	TCONS_00100911	1	Smtnl1	CUFF.40971.1	ENSMUST00000028471	o	TSS60300;
XLOC_011900	0.781606055	0.195291286	4.002257703	TCONS_00037635	1	Psma3	CUFF.15677.4	ENSMUST00000071704	=	TSS22292;
XLOC_008852	0.781131278	0.186500537	4.188359405	TCONS_00027670	1	Psme3	ENSMUST00000142640	ENSMUST00000142640	=	TSS16429;
XLOC_008505	0.779468707	0.193134247	4.035890676	TCONS_00026350	1	Rab11fip4	ENSMUST00000017783	ENSMUST00000017783	=	TSS15650;
XLOC_006860	0.778729771	0.17579161	4.429846051	TCONS_00021652	1	Cct2	CUFF.8779.2	ENSMUST00000047672	j	TSS12760;
XLOC_048923	0.776581052	0.154800275	5.01666455	TCONS_00150910	1	Kcna1	CUFF.61319.2	ENSMUST00000205171	j	TSS89917;
XLOC_011769	0.772931435	0.144339424	5.354957183	TCONS_00037294	1	Psma6	ENSMUST00000163070	ENSMUST00000163070	=	TSS22081;
XLOC_045241	0.768387935	0.130604975	5.883297576	TCONS_00139545	1	Epo	ENSMUST00000031723	ENSMUST00000031723	=	TSS83249;
XLOC_010020	0.767967425	0.08528076	9.005166235	TCONS_00032200	1	Abr	CUFF.11884.2	ENSMUST00000072740	j	TSS18965;
XLOC_042330	0.762293131	0.154243042	4.942155721	TCONS_00128563	1	Ube3c	ENSMUST00000049453	ENSMUST00000049453	=	TSS77058;
XLOC_056095	0.761543046	0.187895633	4.053010882	TCONS_00173178	1	Coq9	ENSMUST00000034234	ENSMUST00000034234	=	TSS103028;
XLOC_025889	0.760946223	0.177490958	4.287239374	TCONS_00077857	1	D17Wsu92e	ENSMUST00000114863	ENSMUST00000114863	=	TSS46783;
XLOC_029321	0.75977304	0.147793434	5.140776701	TCONS_00087713	1	Otub1	CUFF.36287.1	ENSMUST00000123594	j	TSS52803;
XLOC_054071	0.757828137	0.152890895	4.956659689	TCONS_00167100	1	Dennd5a	CUFF.65523.4	ENSMUST00000080437	j	TSS99429;
XLOC_059295	0.75766958	0.165342316	4.582429939	TCONS_00183422	1	Usp4	CUFF.74715.2	ENSMUST00000035237	j	TSS109026;
XLOC_016201	0.754532988	0.188018613	4.013076026	TCONS_00049268	1	Cltb	ENSMUST00000091609	ENSMUST00000091609	=	TSS29552;
XLOC_041118	0.747901378	0.184120218	4.062027429	TCONS_00125716	1	Stx12	ENSMUST00000030698	ENSMUST00000030698	=	TSS75128;
XLOC_051279	0.743996866	0.179676894	4.1407487	TCONS_00157615	1	Rab6a	ENSMUST00000107048	ENSMUST00000107048	=	TSS93972;
XLOC_048987	0.741600883	0.137504151	5.393298137	TCONS_00151156	1	Olr1	CUFF.61406.1	ENSMUST00000032265	o	TSS90037;
XLOC_056301	0.740095802	0.179746136	4.117450404	TCONS_00174059	1	Wwox	CUFF.70312.2	ENSMUST00000004756	j	TSS103477;
XLOC_025861	0.739324103	0.118510872	6.23844961	TCONS_00077741	1	Rab11fip3	ENSMUST00000118828	ENSMUST00000118828	=	TSS46720;
XLOC_009085	0.73861526	0.087402363	8.45074706	TCONS_00028638	1	Sec14l1	ENSMUST00000127090	ENSMUST00000127090	=	TSS16972;
XLOC_014445	0.735723645	0.144226318	5.10117469	TCONS_00044200	1	Vps41	ENSMUST00000222269	ENSMUST00000222269	=	TSS26494;
XLOC_037838	0.73098091	0.174492126	4.189191373	TCONS_00115636	1	Gm10287	ENSMUST00000180599	ENSMUST00000180599	=	TSS69087;
XLOC_052027	0.730868269	0.102722239	7.114995477	TCONS_00160795	1	Tmem86b	ENSMUST00000055085	ENSMUST00000055085	=	TSS95731;
XLOC_043538	0.727840425	0.177306154	4.104992461	TCONS_00133058	1	Mdh2	ENSMUST00000019323	ENSMUST00000019323	=	TSS79674;
XLOC_043294	0.724183163	0.115137684	6.289714535	TCONS_00132042	1	Fbxo21	ENSMUST00000202447	ENSMUST00000202447	=	TSS79086;
XLOC_022827	0.722583056	0.165738514	4.359777559	TCONS_00067834	1	Lztr1	ENSMUST00000115681	ENSMUST00000115681	=	TSS40907;
XLOC_060317	0.718596934	0.169815081	4.231643797	TCONS_00187647	1	Gcom1	CUFF.73423.1	ENSMUST00000163998	j	TSS111312;
XLOC_032876	0.71326381	0.175271174	4.069487259	TCONS_00100602	1	Hoxd3os1	ENSMUST00000132326	ENSMUST00000132326	=	TSS60135;
XLOC_009998	0.708076655	0.100840435	7.021753261	TCONS_00032065	1	Srr	ENSMUST00000065211	ENSMUST00000065211	=	TSS18905;
XLOC_023422	0.707947637	0.137932618	5.132561456	TCONS_00070288	1	Gspt1	CUFF.27672.1	ENSMUST00000167571	j	TSS42224;
XLOC_043815	0.70686547	0.128700489	5.492329311	TCONS_00134160	1	Ankib1	CUFF.52697.2	ENSMUST00000043551	j	TSS80297;
XLOC_022833	0.697025913	0.160401107	4.345518089	TCONS_00067897	1	Klhl22	ENSMUST00000129199	ENSMUST00000129199	=	TSS40927;
XLOC_027324	0.696371801	0.134029544	5.195658972	TCONS_00081650	1	Zmat2	ENSMUST00000001419	ENSMUST00000001419	=	TSS49139;
XLOC_056773	0.695499465	0.169879783	4.094068489	TCONS_00175503	1	Mtus1	CUFF.67940.1	ENSMUST00000059115	j	TSS104310;
XLOC_047925	0.692244326	0.171968021	4.025424752	TCONS_00147663	1	Mkrn1	CUFF.58515.2	ENSMUST00000150575	=	TSS88022;
XLOC_032115	0.688195478	0.160996466	4.2745999	TCONS_00097167	1	Gnas	ENSMUST00000109095	ENSMUST00000109095	=	TSS58338;
XLOC_044160	0.686584987	0.166316971	4.12817154	TCONS_00135484	1	Mrfap1	CUFF.53763.1	ENSMUST00000068795	j	TSS81014;
XLOC_031879	0.686540069	0.169029327	4.061662434	TCONS_00096198	1	Dynlrb1	ENSMUST00000054912	ENSMUST00000054912	=	TSS57816;
XLOC_009845	0.681453133	0.124576827	5.470143583	TCONS_00031459	1	Chd3	ENSMUST00000135909	ENSMUST00000135909	=	TSS18569;
XLOC_039933	0.676259344	0.119545295	5.656929836	TCONS_00121622	1	Gnb1	ENSMUST00000165335	ENSMUST00000165335	=	TSS72800;
XLOC_008486	0.672847054	0.133835165	5.027430972	TCONS_00026273	1	Aldoc	CUFF.12035.4	ENSMUST00000017534	j	TSS15609;
XLOC_052614	0.6711087	0.135499473	4.952851002	TCONS_00162439	1	Psmc4	ENSMUST00000032824	ENSMUST00000032824	=	TSS96700;
XLOC_016249	0.670923219	0.165192335	4.061467024	TCONS_00049479	1	Ubqln1	CUFF.18926.1	ENSMUST00000225818	=	TSS29655;
XLOC_048826	0.670882537	0.15843021	4.234561932	TCONS_00150493	1	Atp6v1e1	ENSMUST00000203527	ENSMUST00000203527	=	TSS89685;
XLOC_046094	0.668921437	0.139872922	4.782351194	TCONS_00141343	1	Capza2	ENSMUST00000148694	ENSMUST00000148694	=	TSS84484;
XLOC_043358	0.66216306	0.14875095	4.451487933	TCONS_00132315	1	Pptc7	ENSMUST00000053426	ENSMUST00000053426	=	TSS79255;
XLOC_009885	0.659037263	0.100431346	6.562067414	TCONS_00031651	1	Elp5	ENSMUST00000142788	ENSMUST00000142788	=	TSS18679;
XLOC_059362	0.65824158	0.137734963	4.779044956	TCONS_00183944	1	Lrrfip2	ENSMUST00000200094	ENSMUST00000200094	=	TSS109286;
XLOC_010243	0.651679403	0.161438193	4.03671145	TCONS_00032964	1	Luc7l3	CUFF.12814.1	ENSMUST00000166312	o	TSS19427;
XLOC_026043	0.648501353	0.070915619	9.144689996	TCONS_00078566	1	Csnk2b	CUFF.31692.6	ENSMUST00000025246	j	TSS47160;
XLOC_029067	0.647816947	0.156341252	4.143608546	TCONS_00086653	1	Pi4k2a	ENSMUST00000066778	ENSMUST00000066778	=	TSS52225;
XLOC_032046	0.642304561	0.101355863	6.337122926	TCONS_00096976	1	Rnf114	ENSMUST00000109214	ENSMUST00000109214	=	TSS58209;
XLOC_029785	0.642279718	0.131841955	4.871588262	TCONS_00089468	1	Cacul1	CUFF.38255.1	ENSMUST00000081790	j	TSS53772;
XLOC_037066	0.63851533	0.156881028	4.070060856	TCONS_00113045	1	Dap3	CUFF.46127.5	ENSMUST00000090938	j	TSS67580;
XLOC_012222	0.638330033	0.138572207	4.606479522	TCONS_00038796	1	Psmc1	ENSMUST00000222374	ENSMUST00000222374	=	TSS22976;
XLOC_040517	0.633119318	0.143714863	4.405385101	TCONS_00123590	1	Gm11258	CUFF.49858.1	ENSMUST00000121086	o	TSS73883;
XLOC_056208	0.625911268	0.154970554	4.038904494	TCONS_00173589	1	Ctcf	CUFF.69894.1	ENSMUST00000005841	j	TSS103251;
XLOC_047222	0.625733551	0.104554991	5.984731507	TCONS_00145135	1	Washc2	CUFF.60856.3	ENSMUST00000036759	j	TSS86641;
XLOC_037048	0.624754578	0.140033236	4.461473535	TCONS_00112946	1	Slc25a44	ENSMUST00000168755	ENSMUST00000168755	=	TSS67537;
XLOC_009366	0.623028227	0.11675156	5.336358904	TCONS_00029770	1	Gm12057	ENSMUST00000117244	ENSMUST00000117244	=	TSS17586;
XLOC_027569	0.620038368	0.111703235	5.550764636	TCONS_00082556	1	Mex3c	CUFF.35485.1	ENSMUST00000091852	j	TSS49681;
XLOC_020849	0.618737565	0.138270518	4.474833651	TCONS_00061857	1	Efr3a	ENSMUST00000174135	ENSMUST00000174135	=	TSS37319;
XLOC_047552	0.614436019	0.127910144	4.803653572	TCONS_00146269	1	Strap	ENSMUST00000064910	ENSMUST00000064910	=	TSS87271;
XLOC_020689	0.612812479	0.143669413	4.265434545	TCONS_00061408	1	Atp6v1c1	CUFF.24869.4	ENSMUST00000022904	j	TSS37036;
XLOC_021019	0.599152686	0.142652697	4.200079636	TCONS_00062616	1	Tef	ENSMUST00000109553	ENSMUST00000109553	=	TSS37720;
XLOC_011872	0.597277753	0.141609616	4.21777679	TCONS_00037552	1	Klhdc2	CUFF.15601.1	ENSMUST00000021362	j	TSS22244;
XLOC_044156	0.59557122	0.105807216	5.628833644	TCONS_00135443	1	Tbc1d14	CUFF.53758.5	ENSMUST00000124036	j	TSS80993;
XLOC_008945	0.568399589	0.091812555	6.190869937	TCONS_00028058	1	Dcaf7	ENSMUST00000058438	ENSMUST00000058438	=	TSS16651;
XLOC_019481	0.567827561	0.087161212	6.514681765	TCONS_00058649	1	Nedd8	CUFF.22392.1	ENSMUST00000163750	j	TSS35192;
XLOC_056981	0.561229877	0.136640283	4.107353006	TCONS_00176195	1	Gatad2a	CUFF.68602.4	ENSMUST00000065169	j	TSS104697;
XLOC_058638	0.559440586	0.121383137	4.608882266	TCONS_00180858	1	Idh3a	ENSMUST00000217484	ENSMUST00000217484	=	TSS107593;
XLOC_001806	0.558644637	0.125531366	4.450239459	TCONS_00005938	1	Angel2	ENSMUST00000027947	ENSMUST00000027947	=	TSS3451;
XLOC_060590	0.550558396	0.127751565	4.309601977	TCONS_00188492	1	Gm28924	CUFF.74215.1	ENSMUST00000190012	o	TSS111795;
XLOC_006834	0.545540538	0.133781177	4.077857201	TCONS_00021547	1	Atxn7l3b	CUFF.8671.1	ENSMUST00000165438	o	TSS12710;
XLOC_020686	0.545380073	0.13540178	4.027864879	TCONS_00061403	1	Azin1	CUFF.24863.1	ENSMUST00000065308	x	TSS37033;
XLOC_056329	0.536070001	0.10369537	5.169661896	TCONS_00174144	1	Hsbp1	ENSMUST00000034300	ENSMUST00000034300	=	TSS103535;
XLOC_006844	0.534747258	0.115816943	4.617176425	TCONS_00021576	1	Rab21	ENSMUST00000020343	ENSMUST00000020343	=	TSS12728;
XLOC_028048	0.532994152	0.120012354	4.441160715	TCONS_00084109	1	Spire1	CUFF.35331.4	ENSMUST00000115050	j	TSS50581;
XLOC_008513	0.532710521	0.118176671	4.50774691	TCONS_00026362	1	Suz12	ENSMUST00000163272	ENSMUST00000163272	=	TSS15661;
XLOC_012920	0.527738551	0.126760206	4.163282539	TCONS_00040858	1	Strn3	CUFF.15155.3	ENSMUST00000013130	j	TSS24218;
XLOC_033209	0.520026684	0.120759182	4.306311761	TCONS_00101608	1	Cry2	CUFF.41298.2	ENSMUST00000090559	j	TSS60777;
XLOC_025976	0.504134025	0.124385976	4.052981215	TCONS_00078216	1	Hnrnpm	CUFF.31510.1	ENSMUST00000139302	o	TSS46985;
XLOC_026381	0.495370771	0.077875725	6.361042204	TCONS_00079796	1	Ralbp1	CUFF.32553.1	ENSMUST00000166543	j	TSS47826;
XLOC_026240	0.484790569	0.090972051	5.329005592	TCONS_00079342	1	Rpl7l1	ENSMUST00000078286	ENSMUST00000078286	=	TSS47553;
XLOC_057207	0.456798429	0.097127703	4.703070422	TCONS_00177073	1	Brd7	CUFF.69494.1	ENSMUST00000034085	j	TSS105177;
XLOC_027869	0.423610741	0.104370699	4.058713289	TCONS_00083578	1	Gm29994	CUFF.34528.1	ENSMUST00000195495	o	TSS50255;
XLOC_004687	0.42270632	0.077735744	5.437734254	TCONS_00014249	1	Snx3	ENSMUST00000105500	ENSMUST00000105500	=	TSS8451;
XLOC_027314	0.420209837	0.09477015	4.433989378	TCONS_00081596	1	Cystm1	ENSMUST00000139727	ENSMUST00000139727	=	TSS49109;
XLOC_039518	0.395504891	0.093239999	4.241794234	TCONS_00120084	1	Yars	CUFF.51627.1	ENSMUST00000106054	j	TSS71926;
XLOC_037444	0.375791836	0.084337314	4.455819327	TCONS_00114298	1	Ahcyl1	CUFF.46968.1	ENSMUST00000029490	j	TSS68303;
XLOC_042925	0.360787708	0.063892903	5.64675717	TCONS_00130721	1	Uso1	ENSMUST00000031355	ENSMUST00000031355	=	TSS78325;
XLOC_037107	-0.270107193	0.058606764	4.608805792	TCONS_00113323	1	Npr1	CUFF.46269.1	ENSMUST00000029540	o	TSS67717;
XLOC_032606	-0.416000105	0.094608626	4.397063153	TCONS_00099464	1	Rab14	CUFF.39577.1	ENSMUST00000028238	j	TSS59528;
XLOC_010445	-0.427066875	0.094920657	4.499198477	TCONS_00033648	1	Dnajc7	ENSMUST00000129346	ENSMUST00000129346	=	TSS19815;
XLOC_033988	-0.444119565	0.10408718	4.266803714	TCONS_00104703	1	Adnp	ENSMUST00000057793	ENSMUST00000057793	=	TSS62457;
XLOC_039317	-0.450526959	0.11182184	4.028971097	TCONS_00119279	1	Mknk1	CUFF.50847.1	ENSMUST00000106513	j	TSS71464;
XLOC_042269	-0.457409398	0.089027561	5.137840394	TCONS_00128362	1	Klhl7	ENSMUST00000030841	ENSMUST00000030841	=	TSS76922;
XLOC_035279	-0.512064344	0.104682224	4.891607405	TCONS_00107301	1	Gm16016	CUFF.45407.1	ENSMUST00000120831	o	TSS64257;
XLOC_043361	-0.520928611	0.121067239	4.3028041	TCONS_00132332	1	Gpn3	ENSMUST00000127608	ENSMUST00000127608	=	TSS79260;
XLOC_057129	-0.526288801	0.11903253	4.421386325	TCONS_00176750	1	Tecr	ENSMUST00000212990	ENSMUST00000212990	=	TSS104994;
XLOC_010300	-0.532037684	0.08819036	6.032832646	TCONS_00033215	1	Pnpo	ENSMUST00000153896	ENSMUST00000153896	=	TSS19557;
XLOC_054156	-0.535141161	0.114985961	4.653969542	TCONS_00167493	1	Gprc5b	ENSMUST00000008878	ENSMUST00000008878	=	TSS99641;
XLOC_063154	-0.549489069	0.109700134	5.009010021	TCONS_00194918	1	4933416E14Rik	CUFF.75600.1	ENSMUST00000137955	o	TSS115824;
XLOC_012897	-0.579360718	0.141459853	4.095584055	TCONS_00040822	1	Gm7422	CUFF.15111.1	ENSMUST00000220115	o	TSS24186;
XLOC_049853	-0.580918174	0.135073975	4.300740945	TCONS_00152948	1	Gm45403	CUFF.62234.1	ENSMUST00000209453	o	TSS91256;
XLOC_040315	-0.604500743	0.106424114	5.680110644	TCONS_00122965	1	Gabbr2	CUFF.49211.3	ENSMUST00000129328	=	TSS73519;
XLOC_035109	-0.615468884	0.143555428	4.287325764	TCONS_00106747	1	D3Ertd254e	ENSMUST00000197653	ENSMUST00000197653	=	TSS63937;
XLOC_059822	-0.621664952	0.131767463	4.717894223	TCONS_00185676	1	Ddx25	CUFF.71618.1	ENSMUST00000034612	o	TSS110222;
XLOC_005792	-0.626781063	0.134112637	4.673542175	TCONS_00018110	1	Rab32	CUFF.5477.1	ENSMUST00000220018	j	TSS10711;
XLOC_004622	-0.627239078	0.153342671	4.090440552	TCONS_00014050	1	Gm8834	ENSMUST00000216459	ENSMUST00000216459	=	TSS8328;
XLOC_055239	-0.637922866	0.128714373	4.956112119	TCONS_00170380	1	Rasa3	CUFF.67209.1	ENSMUST00000117551	x	TSS101394;
XLOC_010470	-0.642079733	0.151382777	4.241431849	TCONS_00033797	1	Gm27029	CUFF.13246.2	ENSMUST00000107257	j	TSS19887;
XLOC_001936	-0.652439491	0.15398344	4.237075696	TCONS_00006304	1	Gm15604	ENSMUST00000118350	ENSMUST00000118350	=	TSS3675;
XLOC_008076	-0.665612761	0.122565107	5.43068722	TCONS_00024545	1	Gm12226	ENSMUST00000144172	ENSMUST00000144172	=	TSS14677;
XLOC_010357	-0.671863579	0.134840614	4.982649952	TCONS_00033445	1	Nr1d1	CUFF.13108.1	ENSMUST00000064941	j	TSS19680;
XLOC_015269	-0.676013162	0.160318652	4.216684409	TCONS_00046571	1	Gm8399	ENSMUST00000082300	ENSMUST00000082300	=	TSS27955;
XLOC_058881	-0.680625324	0.163021438	4.175066383	TCONS_00181856	1	Nedd4	CUFF.73512.1	ENSMUST00000034740	j	TSS108145;
XLOC_024945	-0.682063395	0.166833774	4.088281269	TCONS_00074215	1	Zfp523	CUFF.31225.4	ENSMUST00000002318	j	TSS44732;
XLOC_044919	-0.687022308	0.125589334	5.470387397	TCONS_00138061	1	Mlec	ENSMUST00000112121	ENSMUST00000112121	=	TSS82455;
XLOC_032023	-0.687427922	0.133780573	5.138473433	TCONS_00096870	1	Slc2a10	ENSMUST00000029196	ENSMUST00000029196	=	TSS58154;
XLOC_054261	-0.69159891	0.169543076	4.079192892	TCONS_00167977	1	Taok2	ENSMUST00000214525	ENSMUST00000214525	=	TSS99875;
XLOC_007676	-0.693851384	0.142316469	4.875411747	TCONS_00023185	1	Xbp1	ENSMUST00000063084	ENSMUST00000063084	=	TSS13872;
XLOC_040594	-0.70031451	0.155773865	4.495712498	TCONS_00123888	1	Klhl9	ENSMUST00000094993	ENSMUST00000094993	=	TSS74040;
XLOC_020582	-0.709903556	0.140312575	5.059443565	TCONS_00061105	1	Myo10	ENSMUST00000110457	ENSMUST00000110457	=	TSS36843;
XLOC_048908	-0.713293943	0.159388619	4.475187414	TCONS_00150858	1	Ncapd2	ENSMUST00000188119	ENSMUST00000188119	=	TSS89882;
XLOC_019683	-0.716944426	0.16154349	4.438089254	TCONS_00059342	1	Sorbs3	CUFF.22902.2	ENSMUST00000227929	j	TSS35571;
XLOC_014946	-0.718286704	0.145063847	4.951521121	TCONS_00045640	1	Txndc15	CUFF.18873.2	ENSMUST00000021959	j	TSS27398;
XLOC_007935	-0.732030684	0.140067578	5.226267882	TCONS_00023923	1	Rnf145	ENSMUST00000019333	ENSMUST00000019333	=	TSS14336;
XLOC_026216	-0.73288818	0.180370962	4.063227089	TCONS_00079185	1	Tmem63b	ENSMUST00000113523	ENSMUST00000113523	=	TSS47490;
XLOC_000660	-0.738105106	0.171259751	4.309857414	TCONS_00002209	1	Slc4a3	ENSMUST00000124341	ENSMUST00000124341	=	TSS1261;
XLOC_031898	-0.74331261	0.17340312	4.286616117	TCONS_00096296	1	Phf20	ENSMUST00000145731	ENSMUST00000145731	=	TSS57867;
XLOC_000902	-0.749833951	0.167006708	4.489843323	TCONS_00003121	1	Fam174a	ENSMUST00000059975	ENSMUST00000059975	=	TSS1746;
XLOC_049457	-0.754247912	0.163762425	4.605744659	TCONS_00152203	1		CUFF.59192.1		u	TSS90720;
XLOC_036743	-0.756347162	0.18268959	4.140067108	TCONS_00111995	1	Gm6204	ENSMUST00000198872	ENSMUST00000198872	=	TSS66969;
XLOC_044736	-0.758570426	0.162041018	4.681348201	TCONS_00137221	1	Wdfy3	CUFF.55204.7	ENSMUST00000053177	j	TSS82033;
XLOC_056404	-0.765861368	0.184956688	4.140760611	TCONS_00174448	1	Gm7407	ENSMUST00000208301	ENSMUST00000208301	=	TSS103682;
XLOC_025454	-0.77421097	0.13741091	5.634275851	TCONS_00076274	1	Lpin2	ENSMUST00000142842	ENSMUST00000142842	=	TSS45890;
XLOC_050203	-0.781935391	0.191813692	4.076535836	TCONS_00153789	1	Ptma-ps1	ENSMUST00000181079	ENSMUST00000181079	=	TSS91810;
XLOC_023529	-0.784151748	0.174685888	4.488924419	TCONS_00070679	1	Lamp3	ENSMUST00000081880	ENSMUST00000081880	=	TSS42437;
XLOC_058896	-0.786474299	0.146890629	5.35414891	TCONS_00181911	1	Khdc3	ENSMUST00000172578	ENSMUST00000172578	=	TSS108175;
XLOC_011996	-0.788304667	0.193938198	4.064720993	TCONS_00038029	1	Slc39a9	CUFF.16015.2	ENSMUST00000085245	j	TSS22530;
XLOC_058384	-0.789402278	0.196542985	4.016435775	TCONS_00179955	1	Olfr898	ENSMUST00000217063	ENSMUST00000217063	=	TSS107038;
XLOC_037631	-0.792505472	0.167532796	4.730449733	TCONS_00114972	1	Ank2	CUFF.47451.2	ENSMUST00000182078	j	TSS68689;
XLOC_063819	-0.793147956	0.193410446	4.10085376	TCONS_00196593	1	Gpr165	CUFF.76745.1	ENSMUST00000033554	x	TSS116855;
XLOC_049140	-0.796464366	0.185033441	4.304434706	TCONS_00151543	1	Mgst1	CUFF.61643.1	ENSMUST00000008684	x	TSS90271;
XLOC_049211	-0.799585359	0.159113411	5.025254347	TCONS_00151826	1	Ints13	ENSMUST00000139979	ENSMUST00000139979	=	TSS90417;
XLOC_050078	-0.801912295	0.177635681	4.514364961	TCONS_00153478	1	Irf2bp1	ENSMUST00000053713	ENSMUST00000053713	=	TSS91616;
XLOC_042834	-0.801995273	0.160903065	4.984338061	TCONS_00130464	1	Tecrl	CUFF.54842.1	ENSMUST00000053543	x	TSS78173;
XLOC_062455	-0.80281285	0.195119761	4.11446203	TCONS_00193021	1	Med12	ENSMUST00000117706	ENSMUST00000117706	=	TSS114679;
XLOC_060712	-0.805438106	0.133852777	6.017343252	TCONS_00189059	1	Acy1	ENSMUST00000190851	ENSMUST00000190851	=	TSS112087;
XLOC_035088	-0.806921215	0.192873307	4.183685284	TCONS_00106661	1	Sox2ot	ENSMUST00000198032	ENSMUST00000198032	=	TSS63887;
XLOC_008572	-0.808093307	0.192208431	4.204255268	TCONS_00026596	1	Heatr6	CUFF.12261.1	ENSMUST00000001002	j	TSS15783;
XLOC_003619	-0.808463628	0.200249358	4.037284483	TCONS_00012238	1	Nenf	ENSMUST00000046770	ENSMUST00000046770	=	TSS7022;
XLOC_006361	-0.816055365	0.144118624	5.662386603	TCONS_00019820	1	Gm6419	ENSMUST00000097166	ENSMUST00000097166	=	TSS11719;
XLOC_004368	-0.822154431	0.203480004	4.040467926	TCONS_00013300	1	Katna1	CUFF.5365.3	ENSMUST00000165806	j	TSS7883;
XLOC_005171	-0.826089754	0.133983233	6.165620416	TCONS_00016177	1	AC158605.2	ENSMUST00000220287	ENSMUST00000220287	=	TSS9529;
XLOC_060571	-0.826142828	0.186485247	4.430070706	TCONS_00188432	1	1190002N15Rik	ENSMUST00000113028	ENSMUST00000113028	=	TSS111762;
XLOC_015972	-0.826396192	0.174734844	4.729429878	TCONS_00048562	1	Slc22a23	ENSMUST00000148390	ENSMUST00000148390	=	TSS29137;
XLOC_042560	-0.828987269	0.158353596	5.235039107	TCONS_00129606	1	Gm5555	ENSMUST00000120352	ENSMUST00000120352	=	TSS77639;
XLOC_009182	-0.829594033	0.201462371	4.117860965	TCONS_00029118	1	Gm11945	CUFF.9320.2	ENSMUST00000120551	o	TSS17229;
XLOC_063573	-0.830834924	0.178416764	4.656708842	TCONS_00195859	1	Gm5391	ENSMUST00000121155	ENSMUST00000121155	=	TSS116432;
XLOC_047158	-0.836051875	0.184417145	4.533482359	TCONS_00144810	1	Gm15519	ENSMUST00000120088	ENSMUST00000120088	=	TSS86460;
XLOC_000946	-0.838170487	0.198259212	4.227649639	TCONS_00003208	1	Psmb6-ps2	ENSMUST00000187074	ENSMUST00000187074	=	TSS1806;
XLOC_063540	-0.845134867	0.142299143	5.93914236	TCONS_00195826	1	Slitrk2	CUFF.76214.1	ENSMUST00000166241	x	TSS116399;
XLOC_009768	-0.849975104	0.208108785	4.084282675	TCONS_00031142	1	Epn2	ENSMUST00000108712	ENSMUST00000108712	=	TSS18378;
XLOC_033657	-0.853591307	0.192961231	4.423641489	TCONS_00103413	1	Rrbp1	ENSMUST00000154649	ENSMUST00000154649	=	TSS61759;
XLOC_027706	-0.86074865	0.162122405	5.309251674	TCONS_00083093	1	Abhd3	ENSMUST00000117828	ENSMUST00000117828	=	TSS49974;
XLOC_014831	-0.863165157	0.140086309	6.161666803	TCONS_00045201	1	Cap2	CUFF.18447.1	ENSMUST00000021802	o	TSS27155;
XLOC_050221	-0.869072019	0.158030407	5.499397473	TCONS_00153868	1	Zfp428	ENSMUST00000176880	ENSMUST00000176880	=	TSS91849;
XLOC_002778	-0.87640731	0.214852833	4.079105215	TCONS_00009116	1	Gm3531	ENSMUST00000162698	ENSMUST00000162698	=	TSS5284;
XLOC_048700	-0.878891137	0.208751213	4.21023249	TCONS_00149919	1	Gm16433	ENSMUST00000062429	ENSMUST00000062429	=	TSS89389;
XLOC_015239	-0.87917124	0.163367184	5.381565733	TCONS_00046476	1	AC154788.1	ENSMUST00000225003	ENSMUST00000225003	=	TSS27900;
XLOC_008939	-0.880515773	0.21528241	4.090049778	TCONS_00028038	1	Gm11652	ENSMUST00000117842	ENSMUST00000117842	=	TSS16641;
XLOC_022217	-0.883042637	0.188304514	4.689439567	TCONS_00066816	1	Fbxl7	CUFF.24521.1	ENSMUST00000059204	i	TSS40148;
XLOC_037229	-0.88444966	0.166640168	5.307541817	TCONS_00113604	1	Prune1	ENSMUST00000015855	ENSMUST00000015855	=	TSS67902;
XLOC_007719	-0.902399404	0.178825239	5.046264214	TCONS_00023348	1		CUFF.9588.1		u	TSS13961;
XLOC_025141	-0.904794558	0.201114725	4.49889762	TCONS_00075206	1	Dhx16	CUFF.31759.2	ENSMUST00000025292	j	TSS45265;
XLOC_026686	-0.905535161	0.209068134	4.331292114	TCONS_00080491	1		CUFF.30743.1		u	TSS48289;
XLOC_015401	-0.908821955	0.186016573	4.885704208	TCONS_00046940	1	Ankra2	CUFF.19969.3	ENSMUST00000150916	=	TSS28186;
XLOC_032431	-0.913937467	0.196983306	4.639669649	TCONS_00098467	1	Dpp7	ENSMUST00000139108	ENSMUST00000139108	=	TSS59033;
XLOC_029386	-0.914963953	0.206425592	4.432415299	TCONS_00087963	1	Gm336	ENSMUST00000186376	ENSMUST00000186376	=	TSS52931;
XLOC_016449	-0.919193425	0.20407513	4.504191311	TCONS_00050243	1	Papd7	ENSMUST00000198607	ENSMUST00000198607	=	TSS30064;
XLOC_063512	-0.921057649	0.213511465	4.313855699	TCONS_00195782	1	Hspa9-ps1	ENSMUST00000119602	ENSMUST00000119602	=	TSS116364;
XLOC_054681	-0.923740981	0.221505739	4.170280136	TCONS_00169428	1		CUFF.63127.1		u	TSS100674;
XLOC_010010	-0.924235604	0.230493396	4.009813813	TCONS_00032133	1	Wdr81	ENSMUST00000173320	ENSMUST00000173320	=	TSS18936;
XLOC_021370	-0.929876689	0.225166127	4.129736121	TCONS_00063902	1	AC133203.2	CUFF.24385.1	ENSMUST00000226709	x	TSS38476;
XLOC_014690	-0.935499073	0.195892486	4.775574045	TCONS_00044772	1	Psmg4	ENSMUST00000124996	ENSMUST00000124996	=	TSS26869;
XLOC_049789	-0.937009322	0.190819755	4.910441915	TCONS_00152680	1	Gm44878	ENSMUST00000205812	ENSMUST00000205812	=	TSS91108;
XLOC_039466	-0.938154541	0.176507791	5.315088568	TCONS_00119854	1	Gnl2	ENSMUST00000106176	ENSMUST00000106176	=	TSS71789;
XLOC_019892	-0.939740918	0.145153009	6.474140114	TCONS_00059871	1	Fbxl3	CUFF.23548.2	ENSMUST00000127113	=	TSS35919;
XLOC_008146	-0.952570626	0.229920923	4.143035842	TCONS_00024766	1	Mrpl55	ENSMUST00000108786	ENSMUST00000108786	=	TSS14798;
XLOC_042459	-0.963384478	0.215393225	4.472677716	TCONS_00129310	1	Jakmip1	ENSMUST00000173836	ENSMUST00000173836	=	TSS77436;
XLOC_025002	-0.968938537	0.233035354	4.157903596	TCONS_00074512	1	Rrp1b	ENSMUST00000081339	ENSMUST00000081339	=	TSS44882;
XLOC_030707	-0.969461302	0.175975763	5.509061502	TCONS_00091923	1	Hspa5	ENSMUST00000028222	ENSMUST00000028222	=	TSS55312;
XLOC_016001	-0.979787944	0.225564123	4.343722445	TCONS_00048648	1	AC134860.1	ENSMUST00000224867	ENSMUST00000224867	=	TSS29190;
XLOC_029205	-0.981631917	0.109915503	8.93078673	TCONS_00087174	1	Fam45a	CUFF.38267.2	ENSMUST00000025957	j	TSS52525;
XLOC_024968	-0.987295726	0.211359268	4.671173104	TCONS_00074358	1	BC004004	ENSMUST00000064709	ENSMUST00000064709	=	TSS44801;
XLOC_006381	-0.987344424	0.191803928	5.147675732	TCONS_00019913	1	Smarcb1	ENSMUST00000000925	ENSMUST00000000925	=	TSS11767;
XLOC_056510	-0.999392576	0.091019701	10.97995886	TCONS_00174742	1	Rasa3	CUFF.67208.1	ENSMUST00000117551	j	TSS103867;
XLOC_047042	-1.00031596	0.1230815	8.127264957	TCONS_00144514	1	Gm17797	CUFF.60111.1	ENSMUST00000182175	o	TSS86270;
XLOC_039492	-1.004659791	0.220864285	4.548765272	TCONS_00119972	1	Sfpq	CUFF.51460.1	ENSMUST00000030623	j	TSS71854;
XLOC_060321	-1.010112811	0.243459365	4.148999609	TCONS_00187675	1	Tcf12	CUFF.73439.1	ENSMUST00000183404	j	TSS111323;
XLOC_025487	-1.011703994	0.230646689	4.386379866	TCONS_00076437	1	Gm10093	ENSMUST00000079363	ENSMUST00000079363	=	TSS45981;
XLOC_005016	-1.013274058	0.241730397	4.191752748	TCONS_00015430	1	2810425M01Rik	ENSMUST00000180790	ENSMUST00000180790	=	TSS9121;
XLOC_005212	-1.01435674	0.253256549	4.005253748	TCONS_00016314	1	Gm8394	ENSMUST00000079684	ENSMUST00000079684	=	TSS9617;
XLOC_008764	-1.021965994	0.230182803	4.439801669	TCONS_00027324	1	Atp5l2-ps	ENSMUST00000120130	ENSMUST00000120130	=	TSS16229;
XLOC_034978	-1.022730851	0.225214639	4.541138424	TCONS_00106248	1	Gm16093	ENSMUST00000141455	ENSMUST00000141455	=	TSS63661;
XLOC_030448	-1.036808787	0.243619441	4.255854058	TCONS_00090465	1	Mllt10	ENSMUST00000028076	ENSMUST00000028076	=	TSS54563;
XLOC_022131	-1.038903248	0.254766298	4.077867659	TCONS_00066648	1	Npff	ENSMUST00000023814	ENSMUST00000023814	=	TSS40033;
XLOC_027348	-1.040935646	0.163064251	6.383591968	TCONS_00081713	1	Pcdhb16	CUFF.34547.1	ENSMUST00000051442	o	TSS49216;
XLOC_037032	-1.042635519	0.207617898	5.021896133	TCONS_00112880	1	Bcan	CUFF.45997.2	ENSMUST00000090971	j	TSS67500;
XLOC_016182	-1.043935623	0.235773224	4.427710682	TCONS_00049216	1	Msx2	CUFF.18695.1	ENSMUST00000021922	j	TSS29526;
XLOC_020980	-1.047490491	0.176506061	5.934586538	TCONS_00062402	1	Pick1	CUFF.25999.4	ENSMUST00000053926	j	TSS37612;
XLOC_024857	-1.055225308	0.249793316	4.224393692	TCONS_00073822	1	Abca3	ENSMUST00000133816	ENSMUST00000133816	=	TSS44530;
XLOC_044546	-1.060843881	0.201743491	5.25837971	TCONS_00136610	1	Gm2199	ENSMUST00000119065	ENSMUST00000119065	=	TSS81685;
XLOC_039838	-1.068858927	0.171047654	6.248895571	TCONS_00121216	1	Mthfr	ENSMUST00000097788	ENSMUST00000097788	=	TSS72576;
XLOC_049918	-1.071207579	0.259361829	4.130166654	TCONS_00153058	1	Zfp110	CUFF.62253.1	ENSMUST00000004614	j	TSS91339;
XLOC_001691	-1.073281535	0.193362597	5.550616042	TCONS_00005582	1	Parp1	ENSMUST00000194608	ENSMUST00000194608	=	TSS3227;
XLOC_055840	-1.074468718	0.226254754	4.748933217	TCONS_00172235	1	Nwd1	ENSMUST00000161386	ENSMUST00000161386	=	TSS102479;
XLOC_058769	-1.074794398	0.266196088	4.037604031	TCONS_00181388	1	Gm18541	ENSMUST00000215935	ENSMUST00000215935	=	TSS107899;
XLOC_047419	-1.07534815	0.220076	4.886258154	TCONS_00145922	1	Gm5884	ENSMUST00000036712	ENSMUST00000036712	=	TSS87064;
XLOC_033721	-1.078174072	0.219007701	4.922996162	TCONS_00103600	1	Gm14126	ENSMUST00000122345	ENSMUST00000122345	=	TSS61883;
XLOC_000331	-1.080983288	0.205148941	5.269260886	TCONS_00001007	1	Nck2	CUFF.849.1	ENSMUST00000086421	o	TSS591;
XLOC_013274	-1.087742185	0.18042614	6.028739427	TCONS_00041951	1	Erg28	ENSMUST00000021676	ENSMUST00000021676	=	TSS24891;
XLOC_059312	-1.087829099	0.206483561	5.268356928	TCONS_00183586	1	Ip6k2	ENSMUST00000192307	ENSMUST00000192307	=	TSS109099;
XLOC_058416	-1.089273966	0.219541382	4.961588363	TCONS_00180019	1	AC073947.2	ENSMUST00000215888	ENSMUST00000215888	=	TSS107093;
XLOC_040165	-1.092014335	0.249929877	4.369282893	TCONS_00122324	1	Slc35a1	CUFF.48796.2	ENSMUST00000029970	j	TSS73196;
XLOC_040876	-1.095487899	0.15873015	6.901574157	TCONS_00124778	1	Gm12842	ENSMUST00000117298	ENSMUST00000117298	=	TSS74592;
XLOC_037824	-1.097255108	0.215893516	5.082390293	TCONS_00115550	1	Spata1	ENSMUST00000200488	ENSMUST00000200488	=	TSS69040;
XLOC_021005	-1.098966932	0.246464028	4.458934402	TCONS_00062510	1	Tnrc6b	CUFF.26117.1	ENSMUST00000067689	j	TSS37674;
XLOC_040638	-1.101006289	0.265575057	4.145744346	TCONS_00123983	1	Lrrc19	CUFF.50157.1	ENSMUST00000107101	o	TSS74101;
XLOC_004340	-1.101553601	0.241650232	4.558462843	TCONS_00013150	1		CUFF.5193.2		u	TSS7819;
XLOC_013230	-1.113272338	0.226410288	4.917057214	TCONS_00041780	1	Gm6722	ENSMUST00000221586	ENSMUST00000221586	=	TSS24794;
XLOC_022369	-1.117804292	0.218262976	5.121364665	TCONS_00066968	1		CUFF.25461.1		u	TSS40300;
XLOC_051373	-1.123303812	0.273060973	4.113747202	TCONS_00158017	1	Olfr653	CUFF.65381.1	ENSMUST00000217466	o	TSS94204;
XLOC_008473	-1.12398721	0.263312464	4.268644158	TCONS_00026188	1	Dhrs13	ENSMUST00000021187	ENSMUST00000021187	=	TSS15562;
XLOC_050713	-1.12699935	0.266960486	4.221596118	TCONS_00155619	1	Gm22478	ENSMUST00000122570	ENSMUST00000122570	=	TSS92814;
XLOC_012056	-1.127733721	0.262121461	4.302332647	TCONS_00038355	1	Ylpm1	CUFF.16283.1	ENSMUST00000021670	j	TSS22697;
XLOC_044850	-1.127782986	0.200627198	5.621286634	TCONS_00137699	1	Ep400	CUFF.55619.5	ENSMUST00000041558	j	TSS82268;
XLOC_051890	-1.133186593	0.212688903	5.327906532	TCONS_00160194	1	Gm4535	ENSMUST00000182274	ENSMUST00000182274	=	TSS95432;
XLOC_018428	-1.134620158	0.175926567	6.449396336	TCONS_00055382	1	Gm9174	ENSMUST00000078149	ENSMUST00000078149	=	TSS33257;
XLOC_023420	-1.136225714	0.236982083	4.794563797	TCONS_00070284	1	Gm6305	ENSMUST00000121027	ENSMUST00000121027	=	TSS42221;
XLOC_034136	-1.136663427	0.170880549	6.651801116	TCONS_00105201	1	Arfrp1	ENSMUST00000170190	ENSMUST00000170190	=	TSS62736;
XLOC_007850	-1.146632506	0.212843752	5.387203026	TCONS_00023709	1	Gpr75	ENSMUST00000109430	ENSMUST00000109430	=	TSS14191;
XLOC_018995	-1.147433161	0.133887319	8.570140684	TCONS_00056972	1	Polr3a	CUFF.21302.2	ENSMUST00000026322	j	TSS34216;
XLOC_000320	-1.153001747	0.283881397	4.061561485	TCONS_00000976	1	Gm20646	ENSMUST00000199521	ENSMUST00000199521	=	TSS572;
XLOC_019280	-1.158656243	0.185046393	6.261436513	TCONS_00057862	1	Ddhd1	CUFF.22005.10	ENSMUST00000149286	j	TSS34736;
XLOC_031629	-1.161314349	0.232925819	4.985769102	TCONS_00095262	1	Gm14048	ENSMUST00000121864	ENSMUST00000121864	=	TSS57290;
XLOC_009268	-1.161992717	0.289405436	4.015103285	TCONS_00029497	1	Gm11993	ENSMUST00000121861	ENSMUST00000121861	=	TSS17420;
XLOC_039846	-1.162767065	0.261198834	4.45165489	TCONS_00121253	1	Exosc10	CUFF.52324.4	ENSMUST00000097781	j	TSS72593;
XLOC_019796	-1.166425408	0.268081268	4.351014212	TCONS_00059693	1	AC154855.1	ENSMUST00000227353	ENSMUST00000227353	=	TSS35789;
XLOC_033458	-1.175195395	0.151688052	7.747448636	TCONS_00102546	1	Ubr1	CUFF.42103.1	ENSMUST00000153868	=	TSS61304;
XLOC_019614	-1.177671154	0.268332955	4.388842786	TCONS_00059147	1	Extl3	CUFF.22757.1	ENSMUST00000225633	j	TSS35448;
XLOC_049210	-1.178528221	0.258731929	4.555016553	TCONS_00151825	1	Gm15720	ENSMUST00000117133	ENSMUST00000117133	=	TSS90416;
XLOC_008445	-1.188781851	0.206194547	5.765340891	TCONS_00026047	1	Mrm3	ENSMUST00000040577	ENSMUST00000040577	=	TSS15480;
XLOC_021847	-1.192808004	0.265238213	4.497119748	TCONS_00065564	1	Rps19bp1	CUFF.26077.1	ENSMUST00000052499	j	TSS39423;
XLOC_043113	-1.194073142	0.254324378	4.695079376	TCONS_00131293	1	Rpl5	CUFF.55418.1	ENSMUST00000082223	o	TSS78674;
XLOC_017668	-1.194182137	0.234449438	5.093559397	TCONS_00053107	1	Dcp1a	ENSMUST00000224453	ENSMUST00000224453	=	TSS31919;
XLOC_028661	-1.196074131	0.253668288	4.715110989	TCONS_00085108	1	Rbm4b	ENSMUST00000182821	ENSMUST00000182821	=	TSS51352;
XLOC_033581	-1.200843897	0.223236262	5.379251054	TCONS_00103149	1	Atrn	CUFF.42708.1	ENSMUST00000028781	x	TSS61618;
XLOC_005953	-1.212915933	0.260705336	4.652440007	TCONS_00018578	1	4930519F09Rik	ENSMUST00000159347	ENSMUST00000159347	=	TSS10998;
XLOC_012044	-1.221469536	0.276559978	4.41665329	TCONS_00038302	1	Coq6	ENSMUST00000110276	ENSMUST00000110276	=	TSS22672;
XLOC_056724	-1.222212777	0.294911812	4.14433307	TCONS_00175395	1	Gm8291	ENSMUST00000209635	ENSMUST00000209635	=	TSS104241;
XLOC_063415	-1.22801852	0.281886252	4.356432824	TCONS_00195480	1	Aifm1	CUFF.75998.4	ENSMUST00000037349	j	TSS116192;
XLOC_059788	-1.228377383	0.197185486	6.229552737	TCONS_00185571	1	Gm8162	ENSMUST00000213951	ENSMUST00000213951	=	TSS110166;
XLOC_037982	-1.229601967	0.272801629	4.507311667	TCONS_00115994	1		CUFF.44974.1		u	TSS69314;
XLOC_043971	-1.233870306	0.219862002	5.612021612	TCONS_00134624	1	5031425E22Rik	ENSMUST00000185943	ENSMUST00000185943	=	TSS80557;
XLOC_025831	-1.234049861	0.237271308	5.201007534	TCONS_00077528	1	Cramp1l	ENSMUST00000073337	ENSMUST00000073337	=	TSS46619;
XLOC_041770	-1.241250832	0.231198111	5.368775843	TCONS_00127494	1		CUFF.50129.1		u	TSS76260;
XLOC_021409	-1.241778798	0.302892389	4.099735884	TCONS_00063958	1	Fbxl7	CUFF.24509.3	ENSMUST00000059204	j	TSS38519;
XLOC_004728	-1.243883034	0.156099914	7.968505568	TCONS_00014364	1	Prep	CUFF.6576.1	ENSMUST00000099858	j	TSS8529;
XLOC_009065	-1.250228491	0.292145985	4.279464913	TCONS_00028517	1	Unk	ENSMUST00000106452	ENSMUST00000106452	=	TSS16902;
XLOC_006815	-1.253192743	0.208859218	6.000179223	TCONS_00021504	1	Zdhhc17	CUFF.8636.2	ENSMUST00000041723	j	TSS12680;
XLOC_054297	-1.253760423	0.292865847	4.281005909	TCONS_00168159	1	Bcl7c	ENSMUST00000106282	ENSMUST00000106282	=	TSS99964;
XLOC_005735	-1.254213779	0.305248756	4.10882519	TCONS_00017903	1	Gm26752	ENSMUST00000181086	ENSMUST00000181086	=	TSS10588;
XLOC_051712	-1.256337094	0.22632431	5.551047928	TCONS_00159347	1	Fus	CUFF.66265.2	ENSMUST00000174196	=	TSS95006;
XLOC_056379	-1.258193544	0.247608609	5.08138044	TCONS_00174353	1	Gm21399	ENSMUST00000180210	ENSMUST00000180210	=	TSS103642;
XLOC_031392	-1.261484926	0.273893184	4.605755095	TCONS_00094205	1	Gm13961	ENSMUST00000119282	ENSMUST00000119282	=	TSS56714;
XLOC_026367	-1.263820833	0.29929956	4.222595026	TCONS_00079763	1	Gm17228	ENSMUST00000165006	ENSMUST00000165006	=	TSS47808;
XLOC_032941	-1.265455675	0.261251972	4.843812901	TCONS_00100847	1	Ctnnd1	ENSMUST00000111676	ENSMUST00000111676	=	TSS60278;
XLOC_002654	-1.270748121	0.235389773	5.398484833	TCONS_00008710	1	Pde6d	CUFF.2078.1	ENSMUST00000143674	j	TSS5049;
XLOC_023646	-1.294639903	0.181478064	7.133864421	TCONS_00071119	1	Sec22a	CUFF.28689.1	ENSMUST00000043521	j	TSS42692;
XLOC_059980	-1.304338801	0.322769697	4.041081969	TCONS_00186214	1	Gm10080	ENSMUST00000075585	ENSMUST00000075585	=	TSS110555;
XLOC_037299	-1.305803299	0.227132168	5.749090102	TCONS_00113873	1	Gm9771	ENSMUST00000198267	ENSMUST00000198267	=	TSS68048;
XLOC_032280	-1.310539956	0.241398176	5.428955504	TCONS_00097856	1	Gm13217	ENSMUST00000120466	ENSMUST00000120466	=	TSS58719;
XLOC_025917	-1.312619041	0.190345477	6.895982307	TCONS_00077972	1	Ppil1	ENSMUST00000024802	ENSMUST00000024802	=	TSS46852;
XLOC_043584	-1.314489323	0.301385011	4.361495345	TCONS_00133285	1	Ppp1r35	ENSMUST00000126126	ENSMUST00000126126	=	TSS79787;
XLOC_038794	-1.318037903	0.277445199	4.75062429	TCONS_00117617	1	Gm12430	ENSMUST00000121539	ENSMUST00000121539	=	TSS70443;
XLOC_008534	-1.326438342	0.273805966	4.844446454	TCONS_00026465	1	Ccl12	ENSMUST00000000194	ENSMUST00000000194	=	TSS15708;
XLOC_031353	-1.330347183	0.263561704	5.047573917	TCONS_00094030	1	Ccdc73	ENSMUST00000127840	ENSMUST00000127840	=	TSS56613;
XLOC_054254	-1.336277822	0.276947847	4.825016102	TCONS_00167890	1	Gm6939	ENSMUST00000122029	ENSMUST00000122029	=	TSS99841;
XLOC_044052	-1.337763791	0.243452355	5.494971657	TCONS_00134920	1	Gm5552	ENSMUST00000197149	ENSMUST00000197149	=	TSS80732;
XLOC_023300	-1.341179518	0.315999031	4.244252002	TCONS_00069716	1	Gm10785	ENSMUST00000156242	ENSMUST00000156242	=	TSS41921;
XLOC_031456	-1.343416907	0.288440275	4.657521937	TCONS_00094407	1	Gm14016	ENSMUST00000119095	ENSMUST00000119095	=	TSS56836;
XLOC_042358	-1.34358027	0.228981711	5.867631375	TCONS_00128740	1	Atraid	ENSMUST00000201174	ENSMUST00000201174	=	TSS77141;
XLOC_046627	-1.351467724	0.262194342	5.154450375	TCONS_00143108	1	Grid2	ENSMUST00000159319	ENSMUST00000159319	=	TSS85492;
XLOC_058266	-1.35157863	0.229000251	5.902083609	TCONS_00179610	1	Snx19	CUFF.71467.1	ENSMUST00000164099	j	TSS106816;
XLOC_010068	-1.356441763	0.332404986	4.080690175	TCONS_00032361	1	Wsb1	CUFF.12083.1	ENSMUST00000153585	=	TSS19071;
XLOC_005665	-1.358647777	0.301830522	4.501359794	TCONS_00017718	1	Pan2	ENSMUST00000005825	ENSMUST00000005825	=	TSS10462;
XLOC_045118	-1.363178384	0.153777858	8.864594704	TCONS_00139039	1	Asl	ENSMUST00000161094	ENSMUST00000161094	=	TSS82968;
XLOC_063563	-1.374319426	0.239901496	5.728682179	TCONS_00195849	1		CUFF.76224.1		u	TSS116422;
XLOC_043124	-1.374472764	0.33033881	4.160797104	TCONS_00131352	1	Pigg	ENSMUST00000031189	ENSMUST00000031189	=	TSS78698;
XLOC_016660	-1.375369192	0.298465509	4.608134446	TCONS_00050930	1	Hmgcr	CUFF.19920.8	ENSMUST00000022176	j	TSS30475;
XLOC_036573	-1.398062499	0.330976392	4.224055042	TCONS_00111622	1	Mccc1	ENSMUST00000199113	ENSMUST00000199113	=	TSS66727;
XLOC_023602	-1.403613134	0.196374418	7.147637399	TCONS_00070921	1	Atp13a3	ENSMUST00000100013	ENSMUST00000100013	=	TSS42592;
XLOC_052755	-1.407603993	0.293516922	4.795648516	TCONS_00163105	1	Scgb2b26	CUFF.63129.1	ENSMUST00000085623	o	TSS97047;
XLOC_044115	-1.421184695	0.217841458	6.523940417	TCONS_00135256	1	Tmem129	CUFF.53586.1	ENSMUST00000019439	j	TSS80894;
XLOC_055559	-1.438469233	0.353054639	4.074353013	TCONS_00171163	1	Fat1	CUFF.68000.1	ENSMUST00000215588	j	TSS101892;
XLOC_012934	-1.451137282	0.361026131	4.019479915	TCONS_00040899	1	n-R5s58	ENSMUST00000093682	ENSMUST00000093682	=	TSS24246;
XLOC_010051	-1.451688914	0.323543086	4.48684882	TCONS_00032312	1	Gm3948	ENSMUST00000147795	ENSMUST00000147795	=	TSS19039;
XLOC_032194	-1.453298939	0.181636752	8.001128188	TCONS_00097423	1	Col9a3	CUFF.44198.2	ENSMUST00000132527	j	TSS58487;
XLOC_007851	-1.461220442	0.34514213	4.233677411	TCONS_00023717	1	Asb3	CUFF.10145.1	ENSMUST00000137306	o	TSS14196;
XLOC_050894	-1.462208707	0.180196011	8.11454536	TCONS_00156343	1	Pcsk6	ENSMUST00000176199	ENSMUST00000176199	=	TSS93221;
XLOC_000014	-1.463582499	0.247122391	5.922500567	TCONS_00000015	1	Gm22307	ENSMUST00000180019	ENSMUST00000180019	=	TSS15;
XLOC_025911	-1.470944857	0.235138217	6.255660508	TCONS_00077936	1	Stk38	CUFF.31275.2	ENSMUST00000009138	j	TSS46832;
XLOC_010225	-1.491943046	0.358606357	4.160392077	TCONS_00032912	1	Tom1l1	ENSMUST00000020849	ENSMUST00000020849	=	TSS19392;
XLOC_015221	-1.496245526	0.317636266	4.710562634	TCONS_00046394	1	Gm5626	ENSMUST00000222151	ENSMUST00000222151	=	TSS27856;
XLOC_045126	-1.503207292	0.355287368	4.230961822	TCONS_00139071	1	Galnt17	ENSMUST00000086023	ENSMUST00000086023	=	TSS82980;
XLOC_061689	-1.506316011	0.279322619	5.392746271	TCONS_00190994	1	Rpl19-ps12	ENSMUST00000121251	ENSMUST00000121251	=	TSS113430;
XLOC_039772	-1.507469757	0.366443738	4.113782283	TCONS_00121097	1	Platr16	ENSMUST00000143127	ENSMUST00000143127	=	TSS72489;
XLOC_025288	-1.507769894	0.260335242	5.791647282	TCONS_00075604	1	Zfp318	CUFF.32039.1	ENSMUST00000113481	j	TSS45523;
XLOC_037434	-1.509769277	0.230834492	6.540483895	TCONS_00114266	1	Cept1	CUFF.46933.3	ENSMUST00000039153	=	TSS68283;
XLOC_005092	-1.514850921	0.378064748	4.006855786	TCONS_00015728	1	Stk11	CUFF.7513.1	ENSMUST00000144883	o	TSS9286;
XLOC_043598	-1.516930652	0.342447351	4.429675534	TCONS_00133335	1	Ap4m1	CUFF.56907.3	ENSMUST00000019662	j	TSS79815;
XLOC_051906	-1.519201256	0.364791492	4.164574254	TCONS_00160265	1	Muc5b	ENSMUST00000165147	ENSMUST00000165147	=	TSS95472;
XLOC_060135	-1.522953847	0.209402588	7.272851114	TCONS_00186867	1	Etfa	CUFF.72483.2	ENSMUST00000034866	j	TSS110891;
XLOC_037001	-1.526946412	0.352885189	4.327034572	TCONS_00112744	1	Gm38313	ENSMUST00000191953	ENSMUST00000191953	=	TSS67438;
XLOC_016543	-1.528412939	0.343311569	4.451970392	TCONS_00050576	1		CUFF.19571.1		u	TSS30254;
XLOC_063297	-1.531194029	0.171347576	8.936187256	TCONS_00195210	1	Btbd35f1	CUFF.75818.1	ENSMUST00000178070	x	TSS116018;
XLOC_032729	-1.535328157	0.212708502	7.217991489	TCONS_00099987	1	Gm13502	ENSMUST00000121574	ENSMUST00000121574	=	TSS59819;
XLOC_058809	-1.535614756	0.291301964	5.271556481	TCONS_00181598	1	Ppib	ENSMUST00000213785	ENSMUST00000213785	=	TSS107998;
XLOC_011441	-1.540711388	0.367109054	4.196876572	TCONS_00036372	1	Gm4804	CUFF.14494.1	ENSMUST00000222542	=	TSS21496;
XLOC_002677	-1.541096065	0.371072053	4.153091165	TCONS_00008756	1	Usp40	CUFF.2176.3	ENSMUST00000187758	=	TSS5081;
XLOC_051186	-1.54262267	0.35325468	4.366885296	TCONS_00157254	1	Gm44680	ENSMUST00000208414	ENSMUST00000208414	=	TSS93765;
XLOC_010623	-1.557211906	0.317626286	4.902654388	TCONS_00034549	1	Cpsf4l	CUFF.13674.7	ENSMUST00000100248	j	TSS20288;
XLOC_025902	-1.561611789	0.36188505	4.315214985	TCONS_00077914	1	Gm20109	ENSMUST00000180802	ENSMUST00000180802	=	TSS46817;
XLOC_016337	-1.562354918	0.232138792	6.730262105	TCONS_00049876	1	Ptch1	CUFF.19104.2	ENSMUST00000194663	j	TSS29859;
XLOC_033648	-1.566861416	0.194313738	8.0635648	TCONS_00103387	1	Calr-ps	ENSMUST00000121776	ENSMUST00000121776	=	TSS61741;
XLOC_020914	-1.590382072	0.34724975	4.579937266	TCONS_00062099	1	AC116487.1	ENSMUST00000227033	ENSMUST00000227033	=	TSS37448;
XLOC_060965	-1.599165855	0.274096101	5.834325445	TCONS_00190236	1	Gm2774	ENSMUST00000213650	ENSMUST00000213650	=	TSS112688;
XLOC_041159	-1.601641022	0.242090472	6.615877977	TCONS_00125855	1	Selenon	ENSMUST00000060435	ENSMUST00000060435	=	TSS75219;
XLOC_039450	-1.606653656	0.336356116	4.77664469	TCONS_00119785	1	Mycbp	ENSMUST00000030400	ENSMUST00000030400	=	TSS71756;
XLOC_008092	-1.607555269	0.359407275	4.472795572	TCONS_00024613	1	Gm22884	ENSMUST00000083127	ENSMUST00000083127	=	TSS14705;
XLOC_026391	-1.610077586	0.321585607	5.006684222	TCONS_00079851	1	Ptprm	CUFF.32637.4	ENSMUST00000037974	j	TSS47855;
XLOC_050896	-1.610423353	0.362584453	4.441512419	TCONS_00156369	1	Chsy1	ENSMUST00000036372	ENSMUST00000036372	=	TSS93235;
XLOC_039327	-1.620883312	0.393565117	4.118462848	TCONS_00119344	1	Gm12953	CUFF.50880.1	ENSMUST00000138426	o	TSS71493;
XLOC_032367	-1.624541515	0.338635271	4.797319278	TCONS_00098166	1	Armc3	CUFF.38773.1	ENSMUST00000114640	x	TSS58896;
XLOC_022546	-1.635272143	0.374171529	4.370381005	TCONS_00067150	1		CUFF.26494.1		u	TSS40482;
XLOC_000098	-1.637729934	0.396993953	4.125327148	TCONS_00000319	1	Terf1	CUFF.280.1	ENSMUST00000188371	j	TSS186;
XLOC_016113	-1.645202323	0.354890311	4.635805131	TCONS_00048979	1	Nhlrc1	ENSMUST00000052747	ENSMUST00000052747	=	TSS29390;
XLOC_022032	-1.64794165	0.323346744	5.096515367	TCONS_00066330	1	Snora2b	ENSMUST00000084005	ENSMUST00000084005	=	TSS39848;
XLOC_004971	-1.648778561	0.33143547	4.974659354	TCONS_00015168	1	Gm5778	ENSMUST00000171003	ENSMUST00000171003	=	TSS9006;
XLOC_054336	-1.671538923	0.37851103	4.416090388	TCONS_00168302	1	Fgfr2	CUFF.66324.3	ENSMUST00000136264	=	TSS100044;
XLOC_058790	-1.675090209	0.326400168	5.132013932	TCONS_00181473	1	Igdcc4	ENSMUST00000213533	ENSMUST00000213533	=	TSS107944;
XLOC_060814	-1.675489645	0.263070357	6.368979239	TCONS_00189611	1	Ptpn23	ENSMUST00000040021	ENSMUST00000040021	=	TSS112360;
XLOC_017481	-1.676388886	0.339767043	4.933936115	TCONS_00052357	1	Ptprg	CUFF.20901.1	ENSMUST00000022264	o	TSS31519;
XLOC_005651	-1.682145603	0.333020953	5.051170466	TCONS_00017629	1	Prim1	ENSMUST00000178041	ENSMUST00000178041	=	TSS10418;
XLOC_042503	-1.683787287	0.413148987	4.075496587	TCONS_00129464	1	Cc2d2a	ENSMUST00000048150	ENSMUST00000048150	=	TSS77538;
XLOC_060659	-1.687504946	0.384763933	4.385818947	TCONS_00188711	1	Gm29521	ENSMUST00000216148	ENSMUST00000216148	=	TSS111940;
XLOC_002144	-1.687628009	0.3981204	4.23898903	TCONS_00006847	1	Gm37670	ENSMUST00000193622	ENSMUST00000193622	=	TSS4010;
XLOC_043474	-1.692894803	0.300875953	5.626554012	TCONS_00132825	1	Gm42986	ENSMUST00000201618	ENSMUST00000201618	=	TSS79537;
XLOC_039125	-1.697833504	0.370126987	4.587164843	TCONS_00118397	1	Gm10306	ENSMUST00000094969	ENSMUST00000094969	=	TSS70956;
XLOC_014997	-1.698976686	0.400750161	4.239490966	TCONS_00045805	1	AC124392.1	ENSMUST00000225172	ENSMUST00000225172	=	TSS27489;
XLOC_027191	-1.700073072	0.367150436	4.630453639	TCONS_00081175	1	Gm6304	ENSMUST00000096579	ENSMUST00000096579	=	TSS48871;
XLOC_058004	-1.700732464	0.391096372	4.34862756	TCONS_00178743	1	Gm10717	ENSMUST00000075573	ENSMUST00000075573	=	TSS106308;
XLOC_024148	-1.704514636	0.402695225	4.232765949	TCONS_00072608	1		CUFF.27520.1		u	TSS43610;
XLOC_047523	-1.704954907	0.405884752	4.200588712	TCONS_00146166	1	Gm19434	ENSMUST00000204330	ENSMUST00000204330	=	TSS87210;
XLOC_032487	-1.707396055	0.348887787	4.893825802	TCONS_00098843	1	Gm25541	ENSMUST00000116888	ENSMUST00000116888	=	TSS59230;
XLOC_002715	-1.707514446	0.363343752	4.699446292	TCONS_00008889	1	Per2	ENSMUST00000069620	ENSMUST00000069620	=	TSS5145;
XLOC_031385	-1.719493674	0.276893035	6.209956393	TCONS_00094168	1	Lgr4	CUFF.41750.1	ENSMUST00000046548	j	TSS56687;
XLOC_042128	-1.735161688	0.427889381	4.055164171	TCONS_00128005	1	Gm24666	CUFF.52842.1	ENSMUST00000158937	o	TSS76697;
XLOC_063465	-1.737909639	0.424815199	4.090978014	TCONS_00195637	1	Fam122b	ENSMUST00000071023	ENSMUST00000071023	=	TSS116280;
XLOC_059856	-1.738011832	0.39372869	4.414237206	TCONS_00185800	1	Robo3	ENSMUST00000167089	ENSMUST00000167089	=	TSS110289;
XLOC_040886	-1.760415388	0.349847304	5.031953571	TCONS_00124863	1	Szt2	ENSMUST00000075406	ENSMUST00000075406	=	TSS74630;
XLOC_039533	-1.767945388	0.326951277	5.407366519	TCONS_00120175	1	Gm12966	ENSMUST00000118024	ENSMUST00000118024	=	TSS71969;
XLOC_005186	-1.774832598	0.432937464	4.099512624	TCONS_00016240	1	Eid3	ENSMUST00000211623	ENSMUST00000211623	=	TSS9569;
XLOC_026940	-1.774936899	0.367446585	4.830462359	TCONS_00080747	1		CUFF.32464.1		u	TSS48545;
XLOC_038851	-1.779328008	0.316638012	5.619439052	TCONS_00117775	1	Tmem38b	ENSMUST00000030127	ENSMUST00000030127	=	TSS70543;
XLOC_054547	-1.780757964	0.312321152	5.701688636	TCONS_00169269	1	Ccnd1	CUFF.66766.1	ENSMUST00000093962	=	TSS100530;
XLOC_059928	-1.78167787	0.437457053	4.072806367	TCONS_00185974	1	AC158355.1	CUFF.71774.1	ENSMUST00000215895	x	TSS110417;
XLOC_009243	-1.783031367	0.390235931	4.569111215	TCONS_00029430	1	Gm24313	ENSMUST00000082561	ENSMUST00000082561	=	TSS17384;
XLOC_064355	-1.784539308	0.353078934	5.054221969	TCONS_00198025	1	Mospd2	CUFF.77763.3	ENSMUST00000112248	j	TSS117697;
XLOC_002593	-1.785255629	0.373202316	4.783613479	TCONS_00008525	1	C430014B12Rik	ENSMUST00000181720	ENSMUST00000181720	=	TSS4937;
XLOC_039369	-1.788546995	0.411337175	4.348128749	TCONS_00119534	1	Gm12857	CUFF.51037.1	ENSMUST00000117678	=	TSS71596;
XLOC_046292	-1.789330031	0.416896263	4.292027038	TCONS_00142111	1	Ssbp1	CUFF.58606.2	ENSMUST00000117411	=	TSS84898;
XLOC_031545	-1.795348985	0.424707008	4.227264804	TCONS_00094923	1	Gm9913	ENSMUST00000066157	ENSMUST00000066157	=	TSS57100;
XLOC_027972	-1.809596329	0.351078317	5.154395026	TCONS_00083851	1		CUFF.34974.1		u	TSS50435;
XLOC_015248	-1.810159372	0.437424523	4.138221054	TCONS_00046517	1	AC154548.1	ENSMUST00000225844	ENSMUST00000225844	=	TSS27915;
XLOC_055085	-1.819323314	0.450923055	4.034664657	TCONS_00169836	1		CUFF.66559.1		u	TSS101082;
XLOC_055371	-1.822142439	0.368547471	4.944118686	TCONS_00170615	1	1810012K16Rik	ENSMUST00000190830	ENSMUST00000190830	=	TSS101565;
XLOC_057981	-1.82950475	0.357355036	5.119571758	TCONS_00178713	1		CUFF.70508.1		u	TSS106280;
XLOC_052990	-1.833067408	0.424836724	4.314757424	TCONS_00164088	1	0610005C13Rik	ENSMUST00000210383	ENSMUST00000210383	=	TSS97565;
XLOC_061839	-1.83443271	0.42555583	4.310674601	TCONS_00191464	1	Ssxa1	CUFF.75795.1	ENSMUST00000072593	o	TSS113711;
XLOC_045441	-1.83697981	0.417796224	4.396832008	TCONS_00140433	1	Gm43597	ENSMUST00000201992	ENSMUST00000201992	=	TSS83723;
XLOC_028385	-1.837497306	0.422025319	4.353997786	TCONS_00084698	1		CUFF.34650.1		u	TSS51029;
XLOC_006193	-1.837811628	0.287030242	6.402850145	TCONS_00019203	1	Mcm9	ENSMUST00000075540	ENSMUST00000075540	=	TSS11376;
XLOC_009127	-1.84284613	0.441070521	4.178121279	TCONS_00028841	1	Gm11766	ENSMUST00000143428	ENSMUST00000143428	=	TSS17091;
XLOC_027933	-1.848957967	0.365678474	5.056239556	TCONS_00083758	1	Cdo1	CUFF.34782.1	ENSMUST00000035804	o	TSS50376;
XLOC_011925	-1.848979719	0.414809773	4.457415996	TCONS_00037753	1	Prkch	CUFF.15810.1	ENSMUST00000221153	o	TSS22350;
XLOC_025985	-1.850235242	0.420253652	4.402663089	TCONS_00078275	1	BC051226	ENSMUST00000174467	ENSMUST00000174467	=	TSS47007;
XLOC_057890	-1.861033318	0.277440055	6.707875392	TCONS_00178622	1		CUFF.69923.1		u	TSS106189;
XLOC_003198	-1.868703085	0.344499133	5.424405762	TCONS_00010539	1	Qsox1	ENSMUST00000195419	ENSMUST00000195419	=	TSS6110;
XLOC_032904	-1.871800704	0.320568015	5.839012674	TCONS_00100718	1	Gm13727	ENSMUST00000154480	ENSMUST00000154480	=	TSS60205;
XLOC_020551	-1.873815038	0.312647885	5.993371869	TCONS_00061038	1	Cdh10	CUFF.24391.1	ENSMUST00000166873	=	TSS36799;
XLOC_026068	-1.874282073	0.280735501	6.676327248	TCONS_00078682	1	Ier3	CUFF.31746.1	ENSMUST00000003635	x	TSS47223;
XLOC_008604	-1.885766934	0.32842068	5.741925061	TCONS_00026733	1	Brip1os	CUFF.12411.1	ENSMUST00000143819	j	TSS15864;
XLOC_042894	-1.88606102	0.44724466	4.217067726	TCONS_00130646	1	Afp	CUFF.54942.1	ENSMUST00000042755	o	TSS78282;
XLOC_032798	-1.900967089	0.465520935	4.083526535	TCONS_00100297	1	Scn2a	CUFF.40384.1	ENSMUST00000028377	x	TSS59970;
XLOC_032192	-1.909402568	0.436403349	4.375316032	TCONS_00097410	1	Mrgbp	ENSMUST00000169630	ENSMUST00000169630	=	TSS58483;
XLOC_031933	-1.909767763	0.348610411	5.478229292	TCONS_00096490	1	Adig	ENSMUST00000059889	ENSMUST00000059889	=	TSS57958;
XLOC_009267	-1.920096709	0.476590582	4.028817987	TCONS_00029495	1	Sun3	ENSMUST00000043377	ENSMUST00000043377	=	TSS17418;
XLOC_062593	-1.928476627	0.442531929	4.357824826	TCONS_00193373	1	Dach2	CUFF.77104.4	ENSMUST00000113380	j	TSS114894;
XLOC_009623	-1.929176704	0.316069056	6.103655735	TCONS_00030594	1	Rad50	CUFF.10790.3	ENSMUST00000020649	j	TSS18082;
XLOC_048622	-1.946597985	0.333572107	5.835613788	TCONS_00149676	1	Gm24601	ENSMUST00000157970	ENSMUST00000157970	=	TSS89245;
XLOC_054660	-1.960536242	0.46267265	4.237415466	TCONS_00169406	1		CUFF.62889.1		u	TSS100652;
XLOC_028929	-1.962300056	0.39046111	5.025596675	TCONS_00086127	1	Gm10053	ENSMUST00000073080	ENSMUST00000073080	=	TSS51917;
XLOC_036857	-1.965018173	0.482577714	4.071920683	TCONS_00112303	1	Ccnl1	CUFF.45580.1	ENSMUST00000154585	j	TSS67166;
XLOC_047225	-1.975814226	0.480298424	4.113722067	TCONS_00145189	1	Gm44237	ENSMUST00000205183	ENSMUST00000205183	=	TSS86667;
XLOC_034506	-1.976044582	0.445856635	4.432017887	TCONS_00105651	1		CUFF.41719.1		u	TSS63139;
XLOC_045900	-1.980497873	0.486056682	4.074623283	TCONS_00140941	1		CUFF.56398.1		u	TSS84205;
XLOC_022036	-1.98626274	0.245863425	8.078723936	TCONS_00066358	1	Ddx23	CUFF.26951.2	ENSMUST00000003450	j	TSS39861;
XLOC_010738	-1.991389981	0.495309837	4.020493501	TCONS_00035168	1	2810410L24Rik	ENSMUST00000155681	ENSMUST00000155681	=	TSS20600;
XLOC_045543	-1.995537411	0.497492509	4.011190875	TCONS_00140582	1		CUFF.53429.1		u	TSS83846;
XLOC_021044	-2.000917607	0.404358623	4.948373778	TCONS_00062733	1	Rnu12	ENSMUST00000083242	ENSMUST00000083242	=	TSS37795;
XLOC_017095	-2.005609582	0.303433666	6.609713446	TCONS_00051859	1		CUFF.18764.1		u	TSS31101;
XLOC_030117	-2.016674555	0.393652341	5.122983773	TCONS_00089835	1		CUFF.37944.1		u	TSS54112;
XLOC_036029	-2.022663895	0.405738412	4.985142727	TCONS_00109939	1		CUFF.47424.1		u	TSS65766;
XLOC_056990	-2.024361996	0.362050988	5.591372664	TCONS_00176243	1	Ddx49	ENSMUST00000008004	ENSMUST00000008004	=	TSS104717;
XLOC_046454	-2.024879064	0.350189232	5.782242509	TCONS_00142448	1	Zfp783	CUFF.58807.1	ENSMUST00000130490	j	TSS85138;
XLOC_060575	-2.032243269	0.486900241	4.173839114	TCONS_00188437	1		CUFF.74161.1		u	TSS111767;
XLOC_000220	-2.034544803	0.492751634	4.128945828	TCONS_00000561	1	Gm37905	ENSMUST00000195310	ENSMUST00000195310	=	TSS348;
XLOC_000362	-2.035157101	0.269817792	7.542709043	TCONS_00001118	1	n-R5s211	ENSMUST00000093689	ENSMUST00000093689	=	TSS664;
XLOC_035766	-2.047583093	0.470799368	4.349162795	TCONS_00109026	1	Gm42819	ENSMUST00000199630	ENSMUST00000199630	=	TSS65250;
XLOC_015666	-2.058243199	0.395799607	5.200215374	TCONS_00047788	1	AC139941.1	ENSMUST00000221517	ENSMUST00000221517	=	TSS28655;
XLOC_043262	-2.062460366	0.513342693	4.017706681	TCONS_00131884	1	Gm24265	ENSMUST00000101833	ENSMUST00000101833	=	TSS79002;
XLOC_031803	-2.064147804	0.477645254	4.321508037	TCONS_00095881	1	Tmem74b	ENSMUST00000060196	ENSMUST00000060196	=	TSS57654;
XLOC_028895	-2.069089173	0.270180204	7.658181984	TCONS_00086025	1	Nmrk1	ENSMUST00000159061	ENSMUST00000159061	=	TSS51855;
XLOC_048583	-2.069706854	0.472570242	4.379680884	TCONS_00149517	1	Gm15756	ENSMUST00000161447	ENSMUST00000161447	=	TSS89152;
XLOC_008041	-2.073761912	0.404176564	5.130831659	TCONS_00024332	1	Cdkl3	ENSMUST00000109079	ENSMUST00000109079	=	TSS14579;
XLOC_024427	-2.078690612	0.488740424	4.253158749	TCONS_00072894	1		CUFF.29132.1		u	TSS43896;
XLOC_029929	-2.078728119	0.502416776	4.137457625	TCONS_00089645	1		CUFF.36694.1		u	TSS53922;
XLOC_054641	-2.080354348	0.436131248	4.770019025	TCONS_00169385	1		CUFF.62755.1		u	TSS100631;
XLOC_000282	-2.086955527	0.458223546	4.554448467	TCONS_00000820	1	Gm16152	CUFF.712.2	ENSMUST00000143261	j	TSS486;
XLOC_038928	-2.092780538	0.243347058	8.599982895	TCONS_00117958	1	Slc31a2	ENSMUST00000107468	ENSMUST00000107468	=	TSS70661;
XLOC_010740	-2.095880967	0.491835041	4.261349419	TCONS_00035173	1	2900052L18Rik	ENSMUST00000139014	ENSMUST00000139014	=	TSS20603;
XLOC_031352	-2.099918648	0.458242763	4.582546232	TCONS_00094029	1	Gm13886	ENSMUST00000117876	ENSMUST00000117876	=	TSS56612;
XLOC_027181	-2.100540355	0.497365958	4.223329568	TCONS_00081139	1	Gm26407	ENSMUST00000158504	ENSMUST00000158504	=	TSS48851;
XLOC_012206	-2.100606178	0.383775314	5.473531264	TCONS_00038739	1	AC159193.2	ENSMUST00000220865	ENSMUST00000220865	=	TSS22945;
XLOC_046352	-2.106082463	0.335721481	6.27330266	TCONS_00142208	1	Trbc1	ENSMUST00000103291	ENSMUST00000103291	=	TSS84973;
XLOC_009027	-2.107005315	0.455397991	4.626733886	TCONS_00028306	1	Dnaic2	ENSMUST00000151053	ENSMUST00000151053	=	TSS16800;
XLOC_032204	-2.110270974	0.410094868	5.145811712	TCONS_00097479	1	Col20a1	CUFF.44232.2	ENSMUST00000108856	j	TSS58514;
XLOC_045214	-2.126938137	0.494078645	4.304857454	TCONS_00139397	1	Lrwd1	ENSMUST00000006301	ENSMUST00000006301	=	TSS83165;
XLOC_012453	-2.128962295	0.443829196	4.79680543	TCONS_00039664	1	9230104M06Rik	ENSMUST00000180971	ENSMUST00000180971	=	TSS23483;
XLOC_033847	-2.130277088	0.507813486	4.194999043	TCONS_00104114	1	Gm37790	ENSMUST00000193136	ENSMUST00000193136	=	TSS62139;
XLOC_044118	-2.130648558	0.525455151	4.054862828	TCONS_00135264	1	G630022F23Rik	ENSMUST00000202923	ENSMUST00000202923	=	TSS80905;
XLOC_015491	-2.133212159	0.397575513	5.365552176	TCONS_00047250	1		CUFF.20507.1		u	TSS28349;
XLOC_025393	-2.149415772	0.448931186	4.787851325	TCONS_00076040	1	Prr22	ENSMUST00000187612	ENSMUST00000187612	=	TSS45751;
XLOC_001402	-2.152696759	0.473007247	4.551086207	TCONS_00004574	1	Gm37861	ENSMUST00000193534	ENSMUST00000193534	=	TSS2650;
XLOC_048463	-2.159135401	0.509967826	4.233865925	TCONS_00149024	1	5430434F05Rik	ENSMUST00000206080	ENSMUST00000206080	=	TSS88901;
XLOC_045403	-2.160788723	0.437462436	4.939369745	TCONS_00140293	1	Gm10167	ENSMUST00000150411	ENSMUST00000150411	=	TSS83646;
XLOC_013296	-2.169252564	0.358015649	6.059099847	TCONS_00042031	1	Mir3068	ENSMUST00000197755	ENSMUST00000197755	=	TSS24941;
XLOC_064200	-2.181480963	0.328875084	6.633159721	TCONS_00197590	1	Amot	CUFF.77416.2	ENSMUST00000112835	j	TSS117435;
XLOC_054119	-2.190295775	0.39579111	5.5339691	TCONS_00167307	1	Calca	ENSMUST00000032906	ENSMUST00000032906	=	TSS99542;
XLOC_059519	-2.193470683	0.50096026	4.378532309	TCONS_00184649	1	Cxcr6	ENSMUST00000049810	ENSMUST00000049810	=	TSS109665;
XLOC_010522	-2.195695141	0.398568992	5.508946218	TCONS_00034100	1	Hexim2	CUFF.13385.1	ENSMUST00000062530	x	TSS20031;
XLOC_055624	-2.20233617	0.460612064	4.781325421	TCONS_00171412	1	Gm9685	CUFF.68229.1	ENSMUST00000211275	o	TSS102033;
XLOC_027292	-2.213356483	0.229592446	9.640371544	TCONS_00081485	1	n-R5s25	ENSMUST00000082923	ENSMUST00000082923	=	TSS49058;
XLOC_046567	-2.213864959	0.502849824	4.402636443	TCONS_00142930	1	Pde1c	CUFF.59121.2	ENSMUST00000166102	x	TSS85378;
XLOC_060948	-2.21627222	0.462556576	4.791353827	TCONS_00190136	1	AC125374.1	ENSMUST00000213573	ENSMUST00000213573	=	TSS112654;
XLOC_008032	-2.217423612	0.478765902	4.631540391	TCONS_00024316	1	D930048N14Rik	ENSMUST00000117859	ENSMUST00000117859	=	TSS14561;
XLOC_030767	-2.22129609	0.530712201	4.185500326	TCONS_00092099	1	Gm13543	ENSMUST00000121230	ENSMUST00000121230	=	TSS55433;
XLOC_045924	-2.224990404	0.466480953	4.769734733	TCONS_00140965	1		CUFF.56707.1		u	TSS84229;
XLOC_048094	-2.226447583	0.293032916	7.59794364	TCONS_00148182	1	Gm28402	ENSMUST00000188574	ENSMUST00000188574	=	TSS88338;
XLOC_051167	-2.234571563	0.496373735	4.501792514	TCONS_00157223	1	Tmem126a	CUFF.64900.1	ENSMUST00000032844	x	TSS93732;
XLOC_044264	-2.239333751	0.489737836	4.572515309	TCONS_00135830	1	Gm43316	ENSMUST00000197252	ENSMUST00000197252	=	TSS81205;
XLOC_019050	-2.241012038	0.347704774	6.445157515	TCONS_00057176	1	Itih3	CUFF.21561.2	ENSMUST00000006697	j	TSS34329;
XLOC_047192	-2.246278874	0.559707259	4.013310238	TCONS_00145000	1	Gm15082	ENSMUST00000147045	ENSMUST00000147045	=	TSS86561;
XLOC_037589	-2.252574961	0.492183097	4.576701181	TCONS_00114841	1	Gm4610	CUFF.47353.1	ENSMUST00000198222	j	TSS68609;
XLOC_050019	-2.254443837	0.290208114	7.768369401	TCONS_00153324	1	n-R5s151	ENSMUST00000083959	ENSMUST00000083959	=	TSS91512;
XLOC_033811	-2.276649227	0.460482581	4.944050704	TCONS_00103878	1	Pigu	ENSMUST00000139854	ENSMUST00000139854	=	TSS62042;
XLOC_019036	-2.279663951	0.421759748	5.405124515	TCONS_00057102	1	AC121137.1	CUFF.21455.1	ENSMUST00000225272	o	TSS34290;
XLOC_060544	-2.281658462	0.467717405	4.878284276	TCONS_00188374	1	Gm20561	CUFF.73987.1	ENSMUST00000188131	o	TSS111723;
XLOC_007916	-2.287789456	0.144832005	15.79615952	TCONS_00023860	1	Hspd1-ps3	ENSMUST00000119713	ENSMUST00000119713	=	TSS14298;
XLOC_045065	-2.288238797	0.482605221	4.741429845	TCONS_00138774	1	Gm43339	ENSMUST00000200032	ENSMUST00000200032	=	TSS82841;
XLOC_043132	-2.289145299	0.409427204	5.591092329	TCONS_00131405	1	Fgfrl1	ENSMUST00000196222	ENSMUST00000196222	=	TSS78721;
XLOC_033260	-2.29710555	0.42317342	5.428284105	TCONS_00101841	1	Cd44	CUFF.41570.3	ENSMUST00000099673	=	TSS60899;
XLOC_041691	-2.297743429	0.459947809	4.995661215	TCONS_00127415	1		CUFF.49454.1		u	TSS76181;
XLOC_046867	-2.303592123	0.456967173	5.041045091	TCONS_00143698	1	Pcgf1	CUFF.59633.1	ENSMUST00000165164	j	TSS85863;
XLOC_052252	-2.308021321	0.489945834	4.710768336	TCONS_00161323	1	Slc27a5	ENSMUST00000032539	ENSMUST00000032539	=	TSS96063;
XLOC_050519	-2.308432191	0.317740827	7.26514189	TCONS_00154944	1	E130304I02Rik	ENSMUST00000187873	ENSMUST00000187873	=	TSS92460;
XLOC_033663	-2.310673449	0.386076125	5.985020307	TCONS_00103459	1	Snord17	ENSMUST00000104526	ENSMUST00000104526	=	TSS61787;
XLOC_002450	-2.314008788	0.575804873	4.01873776	TCONS_00007953	1	Gm38387	ENSMUST00000191945	ENSMUST00000191945	=	TSS4637;
XLOC_020488	-2.314534524	0.489240108	4.730876488	TCONS_00060830	1	2410089E03Rik	CUFF.24230.2	ENSMUST00000110617	j	TSS36673;
XLOC_058519	-2.341965	0.579030353	4.044632524	TCONS_00180388	1	E030022I16Rik	ENSMUST00000215131	ENSMUST00000215131	=	TSS107323;
XLOC_054610	-2.345153719	0.540736397	4.336962952	TCONS_00169352	1		CUFF.62501.1		u	TSS100598;
XLOC_012729	-2.348848957	0.554201617	4.238257138	TCONS_00040355	1	Gm9315	CUFF.14638.1	ENSMUST00000222696	o	TSS23920;
XLOC_028883	-2.349077329	0.569503243	4.124783057	TCONS_00085981	1		CUFF.36583.1		u	TSS51826;
XLOC_056109	-2.351527207	0.58279363	4.034922634	TCONS_00173284	1		CUFF.69709.1		u	TSS103079;
XLOC_032149	-2.357766006	0.504451906	4.673916342	TCONS_00097271	1	Zfp973	ENSMUST00000121956	ENSMUST00000121956	=	TSS58397;
XLOC_051415	-2.358610197	0.581726558	4.054499769	TCONS_00158134	1		CUFF.65439.1		u	TSS94276;
XLOC_062794	-2.359060102	0.48564469	4.857584467	TCONS_00193858	1	Gm6368	ENSMUST00000119727	ENSMUST00000119727	=	TSS115193;
XLOC_032603	-2.374427526	0.556523462	4.266536254	TCONS_00099439	1	Traf1	ENSMUST00000172159	ENSMUST00000172159	=	TSS59518;
XLOC_020096	-2.381743003	0.434838328	5.477306961	TCONS_00060305	1		CUFF.21670.2		u	TSS36219;
XLOC_046773	-2.386290285	0.409148563	5.832332068	TCONS_00143396	1	Gm23346	ENSMUST00000083816	ENSMUST00000083816	=	TSS85683;
XLOC_023349	-2.387437915	0.545139328	4.379500418	TCONS_00069977	1	B230307C23Rik	CUFF.30115.1	ENSMUST00000122450	j	TSS42052;
XLOC_063574	-2.389262603	0.578488155	4.130184137	TCONS_00195860	1	Fmr1os	ENSMUST00000181533	ENSMUST00000181533	=	TSS116433;
XLOC_003621	-2.390017499	0.55615122	4.297423819	TCONS_00012249	1	Gm32200	CUFF.5041.4	ENSMUST00000192778	j	TSS7030;
XLOC_043678	-2.390232431	0.336320991	7.106997476	TCONS_00133626	1	0610040B10Rik	ENSMUST00000160231	ENSMUST00000160231	=	TSS79979;
XLOC_042911	-2.390240046	0.299138391	7.99041552	TCONS_00130688	1	Gm22816	ENSMUST00000157450	ENSMUST00000157450	=	TSS78306;
XLOC_049819	-2.40649668	0.587890719	4.093442202	TCONS_00152812	1	Gm36371	CUFF.62172.1	ENSMUST00000209043	o	TSS91185;
XLOC_042093	-2.40814584	0.486884092	4.946035169	TCONS_00127906	1	Gm15750	CUFF.52752.1	ENSMUST00000120970	o	TSS76633;
XLOC_013210	-2.410245128	0.449049703	5.367435078	TCONS_00041707	1	Gm4787	ENSMUST00000062182	ENSMUST00000062182	=	TSS24755;
XLOC_062999	-2.41441808	0.525693535	4.592824376	TCONS_00194433	1	Gm15204	ENSMUST00000119454	ENSMUST00000119454	=	TSS115548;
XLOC_016873	-2.423370886	0.554335756	4.3716662	TCONS_00051609	1	Nim1k	CUFF.20720.1	ENSMUST00000178142	o	TSS30866;
XLOC_038762	-2.433127722	0.605562477	4.01796316	TCONS_00117485	1	Fbxo10	CUFF.49142.1	ENSMUST00000052236	x	TSS70366;
XLOC_061282	-2.436911079	0.602927608	4.041797138	TCONS_00190579	1		CUFF.73001.1		u	TSS113016;
XLOC_057816	-2.444816625	0.600560641	4.070890528	TCONS_00178547	1	Cacna1a	CUFF.69237.1	ENSMUST00000121390	i	TSS106114;
XLOC_050357	-2.452284671	0.460952168	5.32004152	TCONS_00154479	1	4930432E11Rik	CUFF.62959.1	ENSMUST00000063585	j	TSS92191;
XLOC_034575	-2.460700186	0.563680617	4.365415651	TCONS_00105720	1		CUFF.42248.1		u	TSS63208;
XLOC_014124	-2.471497361	0.542326637	4.557211818	TCONS_00043637	1		CUFF.15853.1		u	TSS26079;
XLOC_052971	-2.471566722	0.477592362	5.175054965	TCONS_00163920	1	Snord32a	ENSMUST00000083285	ENSMUST00000083285	=	TSS97493;
XLOC_032190	-2.478061437	0.416671027	5.947285209	TCONS_00097402	1	Slco4a1	ENSMUST00000038259	ENSMUST00000038259	=	TSS58477;
XLOC_049451	-2.479061579	0.501603358	4.942274682	TCONS_00152193	1		CUFF.59186.1		u	TSS90710;
XLOC_059359	-2.481625244	0.579041224	4.28574882	TCONS_00183915	1	1700061E17Rik	ENSMUST00000185439	ENSMUST00000185439	=	TSS109272;
XLOC_003964	-2.487706282	0.495323188	5.022390109	TCONS_00012765	1		CUFF.2243.1		u	TSS7438;
XLOC_048807	-2.492720237	0.573400938	4.347255244	TCONS_00150375	1	Lrtm2	CUFF.60978.1	ENSMUST00000112756	j	TSS89628;
XLOC_005463	-2.5001619	0.307509902	8.130346001	TCONS_00017085	1	Gm25117	ENSMUST00000157194	ENSMUST00000157194	=	TSS10100;
XLOC_058220	-2.503552414	0.610621889	4.100004371	TCONS_00179446	1	Zfp872	ENSMUST00000217301	ENSMUST00000217301	=	TSS106720;
XLOC_000551	-2.503574113	0.61530813	4.068813643	TCONS_00001737	1	Pth2r	ENSMUST00000140190	ENSMUST00000140190	=	TSS1003;
XLOC_020160	-2.504381532	0.484902191	5.164714823	TCONS_00060369	1		CUFF.22374.1		u	TSS36283;
XLOC_012630	-2.505448953	0.350392519	7.150406527	TCONS_00040139	1	CT025611.2	CUFF.14503.1	ENSMUST00000220475	j	TSS23780;
XLOC_052665	-2.523002159	0.504259463	5.003380888	TCONS_00162715	1	Zfp82	ENSMUST00000183025	ENSMUST00000183025	=	TSS96847;
XLOC_052775	-2.526311775	0.297370944	8.495489629	TCONS_00163190	1	Chst8	CUFF.63158.1	ENSMUST00000078686	j	TSS97097;
XLOC_055970	-2.526526638	0.442848758	5.705168165	TCONS_00172716	1	Rtbdn	ENSMUST00000109740	ENSMUST00000109740	=	TSS102758;
XLOC_001271	-2.536793934	0.583898699	4.344578845	TCONS_00004174	1	Gm43544	ENSMUST00000196474	ENSMUST00000196474	=	TSS2397;
XLOC_026543	-2.539347748	0.355402572	7.144989797	TCONS_00080334	1	Gm25935	ENSMUST00000178746	ENSMUST00000178746	=	TSS48138;
XLOC_058876	-2.543134483	0.514272543	4.945110361	TCONS_00181840	1	Gm36948	ENSMUST00000194708	ENSMUST00000194708	=	TSS108134;
XLOC_057027	-2.545197118	0.501907179	5.071051428	TCONS_00176480	1	Gm18860	ENSMUST00000212029	ENSMUST00000212029	=	TSS104826;
XLOC_039507	-2.551555277	0.61704659	4.135109596	TCONS_00120037	1	Zscan20	CUFF.51569.1	ENSMUST00000084276	x	TSS71905;
XLOC_014983	-2.557026081	0.374090268	6.835318365	TCONS_00045755	1	AC135469.1	ENSMUST00000225984	ENSMUST00000225984	=	TSS27459;
XLOC_015744	-2.558818476	0.633638133	4.03829622	TCONS_00048027	1	Gm42683	ENSMUST00000196136	ENSMUST00000196136	=	TSS28794;
XLOC_050796	-2.559609651	0.627468331	4.079265079	TCONS_00156008	1	Gm45001	ENSMUST00000208279	ENSMUST00000208279	=	TSS93026;
XLOC_023153	-2.565780818	0.393015256	6.528450935	TCONS_00069328	1	St3gal6	CUFF.29361.1	ENSMUST00000137035	x	TSS41679;
XLOC_023329	-2.568646683	0.546941627	4.696381762	TCONS_00069890	1	Kcnj6	CUFF.29986.1	ENSMUST00000095873	x	TSS42003;
XLOC_041498	-2.568791132	0.479915517	5.352590283	TCONS_00127216	1		CUFF.48267.1		u	TSS75982;
XLOC_000364	-2.573560492	0.599404795	4.293526704	TCONS_00001120	1	Dnah7c	ENSMUST00000189749	ENSMUST00000189749	=	TSS666;
XLOC_015132	-2.582595174	0.589998967	4.377287621	TCONS_00046116	1	AC187103.1	ENSMUST00000224641	ENSMUST00000224641	=	TSS27697;
XLOC_047198	-2.604803134	0.645763287	4.033681052	TCONS_00145020	1	Hrh1	CUFF.60747.2	ENSMUST00000088987	j	TSS86577;
XLOC_042898	-2.608534309	0.595418213	4.381011957	TCONS_00130656	1	Afp	ENSMUST00000042755	ENSMUST00000042755	=	TSS78288;
XLOC_024118	-2.608864201	0.606076451	4.304513393	TCONS_00072578	1		CUFF.27490.1		u	TSS43580;
XLOC_053435	-2.610361757	0.551725858	4.731265938	TCONS_00164946	1	Gm44667	ENSMUST00000207632	ENSMUST00000207632	=	TSS98177;
XLOC_050314	-2.613659546	0.535411874	4.881586813	TCONS_00154253	1	9530053A07Rik	CUFF.62873.2	ENSMUST00000059886	j	TSS92071;
XLOC_034572	-2.61478697	0.386428196	6.766553262	TCONS_00105717	1		CUFF.42220.1		u	TSS63205;
XLOC_036572	-2.61601405	0.6435288	4.065107962	TCONS_00111621	1	8430422M14Rik	ENSMUST00000199608	ENSMUST00000199608	=	TSS66726;
XLOC_043390	-2.618297883	0.398647941	6.567945326	TCONS_00132462	1	Gm43813	ENSMUST00000196847	ENSMUST00000196847	=	TSS79335;
XLOC_019819	-2.624085514	0.427420682	6.139350816	TCONS_00059731	1	Pcdh20	CUFF.23326.2	ENSMUST00000192557	=	TSS35817;
XLOC_038951	-2.625499603	0.65167439	4.028851898	TCONS_00118062	1	8030451A03Rik	ENSMUST00000141428	ENSMUST00000141428	=	TSS70720;
XLOC_013298	-2.630416534	0.419266401	6.273854829	TCONS_00042042	1	Gm21319	CUFF.16451.1	ENSMUST00000164517	o	TSS24944;
XLOC_032601	-2.633746243	0.609967889	4.317844085	TCONS_00099428	1	Psmd5	ENSMUST00000202917	ENSMUST00000202917	=	TSS59513;
XLOC_004657	-2.640344137	0.599753664	4.402381003	TCONS_00014152	1	Rnu3a	ENSMUST00000196710	ENSMUST00000083936	=	TSS8394;
XLOC_024371	-2.642315354	0.511389953	5.166928565	TCONS_00072833	1		CUFF.28514.1		u	TSS43835;
XLOC_022029	-2.64330756	0.558838241	4.730004793	TCONS_00066325	1	Lalba	ENSMUST00000023726	ENSMUST00000023726	=	TSS39845;
XLOC_054605	-2.644543451	0.350920454	7.536019679	TCONS_00169347	1		CUFF.62488.1		u	TSS100593;
XLOC_060564	-2.649849724	0.53576206	4.945945082	TCONS_00188420	1	Gm38391	ENSMUST00000191720	ENSMUST00000191720	=	TSS111754;
XLOC_021071	-2.65768029	0.57849011	4.594167205	TCONS_00062845	1	Gm37699	ENSMUST00000194753	ENSMUST00000194753	=	TSS37863;
XLOC_039345	-2.661100834	0.623763525	4.266201413	TCONS_00119437	1	Ptch2	ENSMUST00000030443	ENSMUST00000030443	=	TSS71544;
XLOC_010628	-2.663265141	0.554862586	4.799864337	TCONS_00034579	1	4932435O22Rik	CUFF.13691.4	ENSMUST00000148405	j	TSS20304;
XLOC_016939	-2.665049388	0.660956771	4.032108461	TCONS_00051701	1		CUFF.17826.1		u	TSS30943;
XLOC_030139	-2.667457572	0.475992064	5.603995897	TCONS_00089858	1		CUFF.38049.1		u	TSS54135;
XLOC_027305	-2.67067858	0.466550854	5.724303271	TCONS_00081570	1	1700066B19Rik	ENSMUST00000143778	ENSMUST00000143778	=	TSS49091;
XLOC_055183	-2.6713657	0.634017315	4.213395494	TCONS_00170129	1	Tnfsf13b	CUFF.66991.2	ENSMUST00000207792	j	TSS101258;
XLOC_031493	-2.671769165	0.561665513	4.756868817	TCONS_00094661	1	Gm26899	ENSMUST00000181963	ENSMUST00000181963	=	TSS56966;
XLOC_058653	-2.687903172	0.614793038	4.372045559	TCONS_00180924	1	Isl2	ENSMUST00000175950	ENSMUST00000175950	=	TSS107627;
XLOC_033745	-2.690593799	0.626080055	4.297523581	TCONS_00103689	1	Rad21l	CUFF.43344.1	ENSMUST00000180195	j	TSS61927;
XLOC_062209	-2.705216554	0.542427982	4.987236362	TCONS_00192315	1	Pnma3	CUFF.76285.1	ENSMUST00000060418	o	TSS114272;
XLOC_061216	-2.707190857	0.429955751	6.296440622	TCONS_00190513	1		CUFF.72423.1		u	TSS112950;
XLOC_007022	-2.710882336	0.604752606	4.482630268	TCONS_00022246	1	AC131081.1	ENSMUST00000219535	ENSMUST00000219535	=	TSS13099;
XLOC_033420	-2.71772511	0.566938413	4.793686664	TCONS_00102347	1	Plcb2	CUFF.41916.3	ENSMUST00000102524	j	TSS61212;
XLOC_020697	-2.719036628	0.525674028	5.172476633	TCONS_00061437	1	Cthrc1	ENSMUST00000067072	ENSMUST00000067072	=	TSS37050;
XLOC_009660	-2.727478553	0.587237404	4.644592685	TCONS_00030729	1		CUFF.10910.2		u	TSS18150;
XLOC_017859	-2.732433494	0.520118399	5.253483623	TCONS_00053720	1	Ptger2	ENSMUST00000046891	ENSMUST00000046891	=	TSS32264;
XLOC_041410	-2.732517338	0.57066837	4.788275432	TCONS_00126809	1	Zbtb48	ENSMUST00000155389	ENSMUST00000155389	=	TSS75773;
XLOC_001474	-2.73419468	0.610352254	4.479699486	TCONS_00004848	1	Gm37411	ENSMUST00000194180	ENSMUST00000194180	=	TSS2799;
XLOC_027960	-2.738113939	0.648772222	4.220454955	TCONS_00083837	1		CUFF.34905.1		u	TSS50422;
XLOC_047365	-2.747459726	0.635558185	4.322908255	TCONS_00145714	1	Gm23751	ENSMUST00000157583	ENSMUST00000157583	=	TSS86945;
XLOC_013866	-2.750876252	0.572398303	4.805877723	TCONS_00043346	1	D430020J02Rik	ENSMUST00000220477	ENSMUST00000220477	=	TSS25807;
XLOC_054839	-2.75909528	0.689144007	4.003655623	TCONS_00169586	1		CUFF.64209.1		u	TSS100832;
XLOC_004241	-2.761535019	0.641880429	4.302257702	TCONS_00013045	1		CUFF.4638.1		u	TSS7718;
XLOC_014560	-2.762558435	0.669332494	4.127333517	TCONS_00044448	1	Hist1h3g	CUFF.17867.1	ENSMUST00000080859	=	TSS26669;
XLOC_043571	-2.770751679	0.602288583	4.60037224	TCONS_00133202	1	Gm43012	ENSMUST00000198569	ENSMUST00000198569	=	TSS79750;
XLOC_018697	-2.779993696	0.685397931	4.056028724	TCONS_00056087	1	Gm26773	ENSMUST00000180772	ENSMUST00000180772	=	TSS33710;
XLOC_030970	-2.788852549	0.534671124	5.216014895	TCONS_00092754	1	Dcaf17	ENSMUST00000130292	ENSMUST00000130292	=	TSS55826;
XLOC_025135	-2.788888408	0.379963751	7.339880184	TCONS_00075170	1	Ier3	ENSMUST00000003635	ENSMUST00000003635	=	TSS45244;
XLOC_021198	-2.791916672	0.399917089	6.981238726	TCONS_00063322	1	Methig1	ENSMUST00000075675	ENSMUST00000075675	=	TSS38144;
XLOC_035911	-2.793621825	0.558205654	5.004646235	TCONS_00109553	1	Psrc1	ENSMUST00000090561	ENSMUST00000090561	=	TSS65540;
XLOC_004982	-2.797847911	0.58960426	4.745297988	TCONS_00015269	1	Upb1	ENSMUST00000219052	ENSMUST00000219052	=	TSS9039;
XLOC_056970	-2.798533851	0.662211103	4.226044897	TCONS_00176161	1	Gm10033	CUFF.68571.2	ENSMUST00000213012	j	TSS104673;
XLOC_041725	-2.798797337	0.590669961	4.738343786	TCONS_00127449	1		CUFF.49788.1		u	TSS76215;
XLOC_006650	-2.802955573	0.641709417	4.36795144	TCONS_00021086	1	Gm27544	CUFF.8120.2	ENSMUST00000185069	=	TSS12407;
XLOC_040543	-2.808661329	0.338738652	8.291528926	TCONS_00123699	1	Frem1	CUFF.49935.2	ENSMUST00000107230	j	TSS73945;
XLOC_042767	-2.809241858	0.455571059	6.166418613	TCONS_00130201	1	Dancr	ENSMUST00000066220	ENSMUST00000132389	=	TSS78010;
XLOC_021034	-2.819397598	0.570362748	4.943165747	TCONS_00062689	1	n-R5s41	ENSMUST00000083025	ENSMUST00000083025	=	TSS37772;
XLOC_022670	-2.829250246	0.694952062	4.07114447	TCONS_00067278	1		CUFF.27127.1		u	TSS40610;
XLOC_001257	-2.82967665	0.685775147	4.126245552	TCONS_00004147	1	Gm37124	ENSMUST00000192140	ENSMUST00000192140	=	TSS2377;
XLOC_036765	-2.83824476	0.639456311	4.438528031	TCONS_00112072	1	Gm42843	ENSMUST00000196328	ENSMUST00000196328	=	TSS67012;
XLOC_044253	-2.840647158	0.522005303	5.441797505	TCONS_00135819	1	Gm43829	ENSMUST00000196191	ENSMUST00000196191	=	TSS81194;
XLOC_032224	-2.842449828	0.662673811	4.289364963	TCONS_00097591	1	Tcea2	ENSMUST00000129686	ENSMUST00000129686	=	TSS58575;
XLOC_000175	-2.844604593	0.64489028	4.410990028	TCONS_00000488	1	Gm9884	CUFF.471.1	ENSMUST00000194343	o	TSS292;
XLOC_045155	-2.84843444	0.633814579	4.494113159	TCONS_00139140	1	Gm43188	ENSMUST00000200180	ENSMUST00000200180	=	TSS83031;
XLOC_058599	-2.850020344	0.569740567	5.002312473	TCONS_00180752	1	Sik2	CUFF.72328.1	ENSMUST00000176824	x	TSS107525;
XLOC_044612	-2.855823744	0.568644074	5.022163903	TCONS_00136755	1	Jchain	ENSMUST00000164073	ENSMUST00000164073	=	TSS81770;
XLOC_056450	-2.887115045	0.65105217	4.434537163	TCONS_00174566	1	Gm44518	ENSMUST00000208080	ENSMUST00000208080	=	TSS103759;
XLOC_056689	-2.899036883	0.597765943	4.849785968	TCONS_00175262	1	Snord13	CUFF.67656.1	ENSMUST00000157627	=	TSS104171;
XLOC_064243	-2.903213556	0.313666096	9.255745511	TCONS_00197735	1	Kantr	CUFF.77527.1	ENSMUST00000181635	o	TSS117515;
XLOC_004896	-2.903333522	0.59346558	4.892168337	TCONS_00014882	1	Gm16135	ENSMUST00000129470	ENSMUST00000129470	=	TSS8831;
XLOC_013249	-2.905393293	0.605175586	4.800909624	TCONS_00041827	1	AC159649.2	ENSMUST00000222984	ENSMUST00000222984	=	TSS24824;
XLOC_037719	-2.912363989	0.672213023	4.332501589	TCONS_00115273	1	2810428J06Rik	ENSMUST00000198336	ENSMUST00000198336	=	TSS68868;
XLOC_040779	-2.912795601	0.555557386	5.243014806	TCONS_00124393	1	Gm12743	ENSMUST00000126668	ENSMUST00000126668	=	TSS74363;
XLOC_015664	-2.922577908	0.446965955	6.538703627	TCONS_00047779	1	AC139941.2	ENSMUST00000221565	ENSMUST00000221565	=	TSS28652;
XLOC_031993	-2.924021554	0.681774283	4.288841084	TCONS_00096726	1	Rbpjl	ENSMUST00000137427	ENSMUST00000137427	=	TSS58084;
XLOC_049199	-2.930516113	0.497104372	5.895172675	TCONS_00151773	1	Gm44164	ENSMUST00000203605	ENSMUST00000203605	=	TSS90389;
XLOC_057357	-2.932338119	0.724475616	4.047531836	TCONS_00177622	1	Ces4a	CUFF.69847.1	ENSMUST00000161289	x	TSS105476;
XLOC_012540	-2.933471162	0.629923389	4.656869732	TCONS_00039959	1	Mfsd2b	CUFF.14294.4	ENSMUST00000045921	=	TSS23660;
XLOC_024134	-2.938360696	0.665698472	4.413951388	TCONS_00072594	1		CUFF.27506.1		u	TSS43596;
XLOC_051048	-2.939581217	0.62291044	4.719107322	TCONS_00156852	1	Alpk3	ENSMUST00000107348	ENSMUST00000107348	=	TSS93516;
XLOC_016924	-2.947085392	0.493358426	5.973517908	TCONS_00051686	1		CUFF.17769.1		u	TSS30928;
XLOC_006305	-2.948119732	0.66360774	4.442563814	TCONS_00019665	1	Gm26359	CUFF.7022.1	ENSMUST00000158873	=	TSS11622;
XLOC_034292	-2.96147841	0.689842409	4.292978178	TCONS_00105433	1		CUFF.39587.1		u	TSS62921;
XLOC_039349	-2.964026739	0.432117453	6.859308093	TCONS_00119451	1	Gm25099	ENSMUST00000093716	ENSMUST00000093716	=	TSS71553;
XLOC_008503	-2.972494625	0.663795278	4.478029181	TCONS_00026334	1	Nf1	CUFF.12084.1	ENSMUST00000071325	o	TSS15644;
XLOC_012029	-2.973093393	0.57832326	5.140885034	TCONS_00038219	1	Papln	CUFF.16204.2	ENSMUST00000121733	j	TSS22632;
XLOC_059065	-2.975267686	0.699476068	4.253566094	TCONS_00182442	1	Adamts7	ENSMUST00000113059	ENSMUST00000113059	=	TSS108498;
XLOC_044425	-2.975630588	0.537289597	5.53822483	TCONS_00136262	1	Gm42466	ENSMUST00000202099	ENSMUST00000202099	=	TSS81481;
XLOC_002515	-2.983586552	0.373569075	7.986706484	TCONS_00008184	1	Gm37733	ENSMUST00000195478	ENSMUST00000195478	=	TSS4763;
XLOC_039578	-2.985497799	0.717326619	4.161978271	TCONS_00120376	1	Fgr	ENSMUST00000124451	ENSMUST00000124451	=	TSS72081;
XLOC_029812	-2.987720256	0.613785366	4.86769549	TCONS_00089527	1		CUFF.36031.1		u	TSS53804;
XLOC_046448	-2.996400109	0.56599648	5.29402605	TCONS_00142432	1	Rny3	ENSMUST00000083011	ENSMUST00000083011	=	TSS85130;
XLOC_026039	-3.000956245	0.540871803	5.548368817	TCONS_00078532	1	Msh5	CUFF.31674.1	ENSMUST00000097338	j	TSS47144;
XLOC_034240	-3.0015163	0.666394463	4.504113507	TCONS_00105381	1		CUFF.39020.1		u	TSS62869;
XLOC_003017	-3.006231272	0.68580913	4.383480974	TCONS_00009903	1	Gm37677	ENSMUST00000194520	ENSMUST00000194520	=	TSS5747;
XLOC_033970	-3.013534969	0.587244197	5.131655594	TCONS_00104612	1		CUFF.43897.1		u	TSS62405;
XLOC_000593	-3.016331828	0.411722576	7.32612688	TCONS_00001861	1	Gm25360	ENSMUST00000178786	ENSMUST00000178786	=	TSS1077;
XLOC_021594	-3.023919445	0.591048164	5.11619802	TCONS_00064541	1	Gm9920	ENSMUST00000110230	ENSMUST00000110230	=	TSS38884;
XLOC_024050	-3.036693635	0.646075554	4.700214421	TCONS_00072510	1		CUFF.27420.1		u	TSS43512;
XLOC_012775	-3.045813874	0.238096009	12.79237685	TCONS_00040478	1	Pxdn	CUFF.14757.1	ENSMUST00000122328	x	TSS23997;
XLOC_057694	-3.071734614	0.615392516	4.991504666	TCONS_00178420	1		CUFF.68292.1		u	TSS105987;
XLOC_030784	-3.087357848	0.492827998	6.264574783	TCONS_00092142	1	5730507A11Rik	ENSMUST00000204297	ENSMUST00000204297	=	TSS55462;
XLOC_007703	-3.104266267	0.582243441	5.33156073	TCONS_00023281	1	Upp1	CUFF.9531.3	ENSMUST00000020677	j	TSS13925;
XLOC_005118	-3.115756949	0.664287263	4.69037587	TCONS_00015874	1	Izumo4	ENSMUST00000219987	ENSMUST00000219987	=	TSS9368;
XLOC_024338	-3.11820324	0.563750747	5.531173587	TCONS_00072800	1		CUFF.28419.1		u	TSS43802;
XLOC_046993	-3.132778076	0.684027408	4.579901387	TCONS_00144294	1	Gm26811	ENSMUST00000181258	ENSMUST00000181258	=	TSS86158;
XLOC_022767	-3.14112577	0.463572204	6.77591482	TCONS_00067568	1	Rmi2	ENSMUST00000037913	ENSMUST00000037913	=	TSS40770;
XLOC_009143	-3.152331851	0.712788316	4.422535807	TCONS_00028916	1	Gm3807	ENSMUST00000193520	ENSMUST00000193520	=	TSS17128;
XLOC_045148	-3.153202671	0.572364097	5.509085368	TCONS_00139133	1	Gm42995	ENSMUST00000197047	ENSMUST00000197047	=	TSS83024;
XLOC_003512	-3.177303876	0.680865595	4.666565469	TCONS_00011839	1		CUFF.4691.1		u	TSS6789;
XLOC_003473	-3.201421866	0.737874119	4.338710067	TCONS_00011691	1	Gm37960	ENSMUST00000192402	ENSMUST00000192402	=	TSS6701;
XLOC_052048	-3.221201372	0.702082456	4.588067032	TCONS_00160903	1	Rasl2-9	ENSMUST00000147835	ENSMUST00000147835	=	TSS95788;
XLOC_000038	-3.232177567	0.524181443	6.166142675	TCONS_00000121	1	Gm38372	ENSMUST00000194854	ENSMUST00000194854	=	TSS72;
XLOC_008240	-3.252429197	0.573676801	5.669445214	TCONS_00025083	1	Pirt	ENSMUST00000123434	ENSMUST00000123434	=	TSS14964;
XLOC_048701	-3.254059374	0.70500605	4.615647446	TCONS_00149920	1	0610040F04Rik	ENSMUST00000137478	ENSMUST00000137478	=	TSS89390;
XLOC_052041	-3.254067803	0.580291479	5.607643607	TCONS_00160872	1	Sbk3	CUFF.62138.1	ENSMUST00000144863	j	TSS95773;
XLOC_034220	-3.258955627	0.648746004	5.023469285	TCONS_00105361	1		CUFF.38827.1		u	TSS62849;
XLOC_052654	-3.279822027	0.805750485	4.070518216	TCONS_00162663	1	Catsperg2	CUFF.62984.1	ENSMUST00000061193	o	TSS96820;
XLOC_043048	-3.279886618	0.665254724	4.930271818	TCONS_00131062	1	Arhgap24	ENSMUST00000073302	ENSMUST00000073302	=	TSS78538;
XLOC_040765	-3.285228015	0.75909917	4.327798192	TCONS_00124346	1	Podn	ENSMUST00000106709	ENSMUST00000106709	=	TSS74332;
XLOC_044149	-3.289242991	0.48057885	6.844335727	TCONS_00135395	1	Gm43860	ENSMUST00000201742	ENSMUST00000201742	=	TSS80976;
XLOC_013192	-3.301091781	0.521843999	6.325821102	TCONS_00041664	1	Scarna3b	ENSMUST00000157533	ENSMUST00000157533	=	TSS24725;
XLOC_051694	-3.316446378	0.534708778	6.202341381	TCONS_00159224	1	Snora30	ENSMUST00000083325	ENSMUST00000083325	=	TSS94941;
XLOC_033583	-3.320169024	0.684316022	4.851806647	TCONS_00103160	1	Adam33	ENSMUST00000128828	ENSMUST00000128828	=	TSS61623;
XLOC_046535	-3.32141415	0.756798854	4.388767417	TCONS_00142795	1	Jazf1	CUFF.58975.1	ENSMUST00000128282	x	TSS85311;
XLOC_000236	-3.324819573	0.480484099	6.919728621	TCONS_00000641	1	Gm37127	ENSMUST00000192924	ENSMUST00000192924	=	TSS392;
XLOC_063085	-3.325385283	0.334144084	9.951950194	TCONS_00194657	1	Gm14451	CUFF.75421.1	ENSMUST00000121581	o	TSS115688;
XLOC_028699	-3.3338008	0.457605551	7.285315473	TCONS_00085248	1	Gm10814	ENSMUST00000180505	ENSMUST00000180505	=	TSS51423;
XLOC_007471	-3.35396533	0.815216331	4.114202821	TCONS_00022798	1	Tmcc3	CUFF.8228.1	ENSMUST00000132743	i	TSS13597;
XLOC_026922	-3.388539232	0.643575969	5.265173651	TCONS_00080729	1		CUFF.32314.1		u	TSS48527;
XLOC_049160	-3.399943747	0.442872877	7.677019578	TCONS_00151584	1	Gm28523	ENSMUST00000190040	ENSMUST00000190040	=	TSS90298;
XLOC_025589	-3.401977765	0.570527416	5.962864659	TCONS_00076744	1	Gm26734	ENSMUST00000181769	ENSMUST00000181769	=	TSS46168;
XLOC_038568	-3.447967841	0.794482068	4.339893849	TCONS_00116879	1	Gm11896	CUFF.48648.1	ENSMUST00000121105	o	TSS70004;
XLOC_054861	-3.450530811	0.691610986	4.989120882	TCONS_00169608	1		CUFF.64444.1		u	TSS100854;
XLOC_024155	-3.493242709	0.87183824	4.006755551	TCONS_00072615	1		CUFF.27527.1		u	TSS43617;
XLOC_041850	-3.493603677	0.545841183	6.400403245	TCONS_00127574	1		CUFF.50744.1		u	TSS76340;
XLOC_044651	-3.499039565	0.832614551	4.202472274	TCONS_00136897	1	Ppef2	ENSMUST00000201130	ENSMUST00000201130	=	TSS81850;
XLOC_004599	-3.501100586	0.453909451	7.713213677	TCONS_00013998	1	Rnf217	CUFF.6104.1	ENSMUST00000081989	x	TSS8295;
XLOC_029002	-3.504704332	0.864895426	4.052171193	TCONS_00086386	1	Kif20b	ENSMUST00000087341	ENSMUST00000087341	=	TSS52069;
XLOC_043026	-3.508770645	0.439485435	7.983815541	TCONS_00130997	1	Gm27553	CUFF.55182.1	ENSMUST00000183460	=	TSS78497;
XLOC_055472	-3.510313113	0.456697564	7.686296994	TCONS_00170967	1	Tex15	ENSMUST00000149399	ENSMUST00000149399	=	TSS101763;
XLOC_049404	-3.547996719	0.578813017	6.129780453	TCONS_00152146	1		CUFF.58788.1		u	TSS90663;
XLOC_045194	-3.549036628	0.741509028	4.786235221	TCONS_00139343	1	Gm42731	ENSMUST00000201839	ENSMUST00000201839	=	TSS83136;
XLOC_060561	-3.557208445	0.886584704	4.012260112	TCONS_00188416	1	Plscr4	CUFF.74113.1	ENSMUST00000034941	x	TSS111750;
XLOC_023052	-3.562230626	0.419087614	8.499966372	TCONS_00068917	1	Tmem39a	ENSMUST00000163884	ENSMUST00000163884	=	TSS41454;
XLOC_006942	-3.569812997	0.841587012	4.241763416	TCONS_00021881	1		CUFF.8988.1		u	TSS12913;
XLOC_005959	-3.580050961	0.813188854	4.402484055	TCONS_00018589	1	Gm46218	ENSMUST00000215448	ENSMUST00000215448	=	TSS11007;
XLOC_042903	-3.585784411	0.828099995	4.330134562	TCONS_00130670	1	Cxcl5	ENSMUST00000202380	ENSMUST00000202380	=	TSS78297;
XLOC_037635	-3.601556596	0.581561133	6.192911445	TCONS_00114997	1	Gm43750	ENSMUST00000199027	ENSMUST00000199027	=	TSS68708;
XLOC_039204	-3.60832125	0.447570391	8.062019569	TCONS_00118739	1	4930456L15Rik	ENSMUST00000145577	ENSMUST00000145577	=	TSS71162;
XLOC_040475	-3.62201648	0.466344445	7.766826691	TCONS_00123488	1	Tnc	CUFF.49647.1	ENSMUST00000107372	j	TSS73818;
XLOC_031039	-3.629725868	0.190668391	19.03685161	TCONS_00092990	1	Pde11a	CUFF.40781.1	ENSMUST00000144892	x	TSS55970;
XLOC_006099	-3.631594756	0.546671665	6.643100397	TCONS_00019025	1	Gm26860	ENSMUST00000181674	ENSMUST00000181674	=	TSS11250;
XLOC_057684	-3.637124509	0.602319447	6.038530759	TCONS_00178410	1		CUFF.68282.1		u	TSS105977;
XLOC_057733	-3.654806539	0.610328511	5.988261196	TCONS_00178460	1		CUFF.68568.1		u	TSS106027;
XLOC_057612	-3.660512849	0.830240226	4.408980359	TCONS_00178336	1		CUFF.67455.1		u	TSS105903;
XLOC_008955	-3.685956511	0.548327867	6.722176153	TCONS_00028088	1	Gm22711	CUFF.13503.2	ENSMUST00000197029	o	TSS16668;
XLOC_046256	-3.687644604	0.38893878	9.481298328	TCONS_00141969	1		CUFF.58418.1		u	TSS84813;
XLOC_055647	-3.697219499	0.592304954	6.242087753	TCONS_00171456	1	9330121K16Rik	ENSMUST00000211464	ENSMUST00000211464	=	TSS102068;
XLOC_050720	-3.703999358	0.678945229	5.455520119	TCONS_00155651	1	Plekha4	ENSMUST00000211227	ENSMUST00000211227	=	TSS92831;
XLOC_046543	-3.705759729	0.720638377	5.142329148	TCONS_00142825	1	Gm16499	ENSMUST00000204633	ENSMUST00000204633	=	TSS85325;
XLOC_024843	-3.710086132	0.760417316	4.879013214	TCONS_00073781	1	AC122821.1	ENSMUST00000228934	ENSMUST00000228934	=	TSS44500;
XLOC_028105	-3.720338421	0.905844986	4.107036501	TCONS_00084295	1		CUFF.35642.1		u	TSS50688;
XLOC_034023	-3.724861303	0.754122865	4.939329488	TCONS_00104833	1	Cbln4	CUFF.44009.1	ENSMUST00000087950	j	TSS62534;
XLOC_003721	-3.733165268	0.743587847	5.020476441	TCONS_00012519	1		CUFF.412.1		u	TSS7192;
XLOC_027476	-3.737899354	0.509471423	7.336818491	TCONS_00082131	1	Adamts19	CUFF.35070.4	ENSMUST00000052907	j	TSS49447;
XLOC_055804	-3.752578755	0.408234453	9.192214741	TCONS_00172060	1	Ankle1	ENSMUST00000119976	ENSMUST00000119976	=	TSS102391;
XLOC_056083	-3.771884571	0.610023041	6.183183783	TCONS_00173119	1	Nlrc5	ENSMUST00000212382	ENSMUST00000212382	=	TSS102997;
XLOC_019461	-3.785867162	0.773146311	4.896702097	TCONS_00058531	1	Myh6	ENSMUST00000081857	ENSMUST00000081857	=	TSS35127;
XLOC_043049	-3.790095265	0.863294535	4.390269036	TCONS_00131073	1	Mapk10	CUFF.55242.1	ENSMUST00000170792	x	TSS78545;
XLOC_035120	-3.795909686	0.844768242	4.493433227	TCONS_00106810	1	Gm12532	ENSMUST00000148448	ENSMUST00000148448	=	TSS63971;
XLOC_015854	-3.811100687	0.428284264	8.898530732	TCONS_00048255	1	Gm44297	CUFF.17868.1	ENSMUST00000198304	=	TSS28944;
XLOC_053743	-3.884947185	0.684504677	5.675559742	TCONS_00165961	1	C230038L03Rik	ENSMUST00000136294	ENSMUST00000136294	=	TSS98764;
XLOC_058655	-3.885668239	0.747722419	5.19667211	TCONS_00180931	1	Gm7435	CUFF.72525.1	ENSMUST00000214039	j	TSS107631;
XLOC_019000	-3.897937236	0.904162397	4.311103015	TCONS_00056987	1		CUFF.21311.3		u	TSS34224;
XLOC_002878	-3.903947169	0.466796486	8.363274545	TCONS_00009358	1	Gm37745	ENSMUST00000193304	ENSMUST00000193304	=	TSS5433;
XLOC_054075	-3.943211297	0.897879909	4.391691204	TCONS_00167130	1	AA474408	ENSMUST00000098110	ENSMUST00000098110	=	TSS99447;
XLOC_026608	-3.945003611	0.670161318	5.886647742	TCONS_00080410	1		CUFF.30313.1		u	TSS48208;
XLOC_061259	-3.953947055	0.260314561	15.18911211	TCONS_00190556	1		CUFF.72733.1		u	TSS112993;
XLOC_026607	-3.979681197	0.767075414	5.188122477	TCONS_00080409	1		CUFF.30312.1		u	TSS48207;
XLOC_043856	-3.988072538	0.706014037	5.648715648	TCONS_00134343	1	Dbf4	CUFF.52799.3	ENSMUST00000168637	=	TSS80382;
XLOC_056755	-3.993713613	0.818737538	4.877892401	TCONS_00175449	1	Sgcz	ENSMUST00000135764	ENSMUST00000135764	=	TSS104281;
XLOC_031552	-4.026251931	0.88826996	4.532689511	TCONS_00094951	1	Slc27a2	CUFF.42429.2	ENSMUST00000061491	j	TSS57114;
XLOC_045747	-4.047079144	1.0036738	4.032265406	TCONS_00140788	1		CUFF.54915.1		u	TSS84052;
XLOC_037215	-4.118246259	1.018516508	4.043377037	TCONS_00113521	1	A730011C13Rik	ENSMUST00000141787	ENSMUST00000141787	=	TSS67864;
XLOC_041985	-4.123381756	0.991860963	4.157217503	TCONS_00127710	1		CUFF.52173.1		u	TSS76476;
XLOC_047998	-4.144100079	0.284797627	14.55103444	TCONS_00147870	1		CUFF.58785.2		u	TSS88146;
XLOC_050322	-4.161729471	0.672114721	6.191992735	TCONS_00154283	1	AF357399	ENSMUST00000104523	ENSMUST00000104523	=	TSS92086;
XLOC_027070	-4.175221034	0.531532746	7.855058921	TCONS_00080881	1		CUFF.33165.1		u	TSS48679;
XLOC_043818	-4.182008881	0.695011385	6.017180399	TCONS_00134182	1		CUFF.52744.1		u	TSS80310;
XLOC_056895	-4.197043234	0.81209349	5.168177413	TCONS_00175943	1	Gm34730	ENSMUST00000210674	ENSMUST00000210674	=	TSS104548;
XLOC_050388	-4.296031405	0.654220711	6.566639263	TCONS_00154633	1	Nphs1	CUFF.63065.1	ENSMUST00000006825	j	TSS92267;
XLOC_009528	-4.304022042	1.019302286	4.222517795	TCONS_00030309	1	2310031A07Rik	ENSMUST00000181212	ENSMUST00000181212	=	TSS17912;
XLOC_022466	-4.304354583	0.637717289	6.749628176	TCONS_00067067	1		CUFF.25955.1		u	TSS40399;
XLOC_043614	-4.314711469	1.054061145	4.093416676	TCONS_00133399	1	Gm24082	CUFF.56942.1	ENSMUST00000175175	=	TSS79845;
XLOC_015993	-4.32000992	0.673066522	6.418399638	TCONS_00048630	1	AC131117.2	CUFF.18115.1	ENSMUST00000225886	o	TSS29179;
XLOC_009441	-4.332145186	0.815904579	5.309622349	TCONS_00029995	1		CUFF.10164.4		u	TSS17735;
XLOC_037554	-4.382164004	0.695615187	6.299695706	TCONS_00114752	1	Gm42664	ENSMUST00000199417	ENSMUST00000199417	=	TSS68560;
XLOC_014591	-4.3873032	0.870875998	5.037804703	TCONS_00044549	1	D130043K22Rik	CUFF.17915.1	ENSMUST00000006893	j	TSS26723;
XLOC_034092	-4.39218739	0.729527058	6.020595589	TCONS_00105012	1	Gm14412	ENSMUST00000108959	ENSMUST00000108959	=	TSS62641;
XLOC_024821	-4.437813104	0.86203475	5.148067527	TCONS_00073734	1	Vmn2r112	CUFF.30923.1	ENSMUST00000097381	o	TSS44472;
XLOC_022680	-4.52096015	0.884953444	5.108698292	TCONS_00067288	1		CUFF.27155.1		u	TSS40620;
XLOC_029712	-4.566829045	0.990673322	4.609823385	TCONS_00089154	1	Nt5c2	CUFF.37837.1	ENSMUST00000168536	o	TSS53615;
XLOC_050999	-4.572327799	0.621687108	7.354709054	TCONS_00156661	1	Gm9885	ENSMUST00000064591	ENSMUST00000186234	=	TSS93411;
XLOC_059125	-4.580496737	0.608066999	7.532881649	TCONS_00182659	1	Gm26767	ENSMUST00000180936	ENSMUST00000180936	=	TSS108623;
XLOC_051025	-4.633434714	0.783017928	5.917405654	TCONS_00156753	1	5430400D12Rik	ENSMUST00000181717	ENSMUST00000181717	=	TSS93463;
XLOC_036055	-4.635173022	0.360932979	12.84219867	TCONS_00110015	1	Ank2	CUFF.47486.1	ENSMUST00000182078	x	TSS65811;
XLOC_043596	-4.658219838	0.889244965	5.238398889	TCONS_00133328	1	Zfp113	CUFF.56902.1	ENSMUST00000049393	x	TSS79812;
XLOC_061659	-4.746215204	0.940288601	5.047615379	TCONS_00190963	1	Gm14349	CUFF.75405.1	ENSMUST00000137155	o	TSS113399;
XLOC_019583	-4.774645085	0.637661509	7.487742346	TCONS_00059030	1	Gm4131	ENSMUST00000186010	ENSMUST00000186010	=	TSS35384;
XLOC_036824	-4.787405514	1.083267005	4.419414133	TCONS_00112203	1	9330121J05Rik	CUFF.45534.1	ENSMUST00000192267	o	TSS67103;
XLOC_025525	-4.806705142	0.643506927	7.469546855	TCONS_00076563	1		CUFF.33176.1		u	TSS46051;
XLOC_032735	-4.819164664	0.795657186	6.056835469	TCONS_00099993	1	Kcnj3	CUFF.40135.1	ENSMUST00000067101	x	TSS59825;
XLOC_062516	-4.931138366	0.72071433	6.842015156	TCONS_00193184	1	Gm24993	CUFF.76949.1	ENSMUST00000157411	o	TSS114780;
XLOC_030512	-5.021396975	0.577634646	8.693032885	TCONS_00090718	1	Il1rn	ENSMUST00000114487	ENSMUST00000114487	=	TSS54699;
XLOC_033700	-5.077360935	0.976430703	5.199919379	TCONS_00103549	1	Gzf1	CUFF.43256.1	ENSMUST00000028928	x	TSS61848;
XLOC_047505	-5.121699309	0.859398007	5.95963601	TCONS_00146107	1	Lrp6	CUFF.61485.1	ENSMUST00000032322	x	TSS87181;
XLOC_013213	-5.28161497	0.665968545	7.930727375	TCONS_00041729	1	Adam21	CUFF.16055.1	ENSMUST00000008582	=	TSS24758;
XLOC_057089	-5.682421409	0.908768786	6.252879166	TCONS_00176620	1	Gm45326	CUFF.68980.1	ENSMUST00000209234	o	TSS104920;
XLOC_040094	-5.925522374	1.431924515	4.138152754	TCONS_00122157	1	Pnisr	CUFF.48578.1	ENSMUST00000098238	x	TSS73090;
XLOC_003396	-6.494327847	0.547976041	11.85148139	TCONS_00011407	1	B930036N10Rik	ENSMUST00000181170	ENSMUST00000181170	=	TSS6547;
XLOC_054277	-6.565079753	0.770669646	8.518669165	TCONS_00168103	1	Zfp771	CUFF.66166.1	ENSMUST00000052509	x	TSS99931;
XLOC_061621	-12.1842373	2.464061675	4.94477773	TCONS_00190919	1	mt-Rnr2	ENSMUST00000082390	ENSMUST00000082390	=	TSS113356;
