# Supplementary material for: Loss of Tsc1 in cerebellar Purkinje cells induces transcriptional and translation changes in FMRP target transcripts
Source: eLife. 2021 Jul 14;10:e67399. doi: 10.7554/eLife.67399 (PMC8279760; doi:10.7554/eLife.67399)
Supplement: Supplementary file 5. [file elife-67399-supp5.csv]

V1	V2	V3	V4	V5	V6	V7	transcript_id	exon_number	gene_name	oId	nearest_ref	class_code	tss_id	CC-WW RNA	CC-WW TRAP
XLOC_004496	11.97938743	3.607280854	-8.372106579	12.00955094	5.010137852	-6.999413088	TCONS_00013675	1	Hbs1l	ENSMUST00000020153	ENSMUST00000020153	=	TSS8095;	0.030163507	1.402856997	1.37269349
XLOC_005498	10.24312447	3.639050405	-6.604074061	11.01845149	3.416409473	-7.602042019	TCONS_00017158	1	Zfc3h1	ENSMUST00000036044	ENSMUST00000036044	=	TSS10145;	0.775327026	-0.222640932	-0.997967958
XLOC_007739	11.96388008	4.518090953	-7.445789124	12.12886572	3.248948867	-8.879916854	TCONS_00023396	1	C1d	CUFF.9636.1	ENSMUST00000000594	j	TSS13992;	0.164985644	-1.269142086	-1.43412773
XLOC_015235	10.43744897	3.557196508	-6.880252461	10.45080503	3.637132322	-6.813672708	TCONS_00046450	1	Ttc37	ENSMUST00000091466	ENSMUST00000091466	=	TSS27880;	0.01335606	0.079935814	0.066579754
XLOC_016449	10.48361956	4.464956373	-6.018663184	10.740733	3.789533613	-6.951199383	TCONS_00050243	1	Papd7	ENSMUST00000198607	ENSMUST00000198607	=	TSS30064;	0.257113439	-0.67542276	-0.932536199
XLOC_016817	11.51115488	4.507818945	-7.003335937	11.89618876	4.688146712	-7.208042047	TCONS_00051475	1	Skiv2l2	ENSMUST00000022281	ENSMUST00000022281	=	TSS30780;	0.385033877	0.180327768	-0.20470611
XLOC_019864	9.574456989	3.118678053	-6.455778937	9.810433499	3.355443896	-6.454989602	TCONS_00059805	1	Dis3	CUFF.23433.2	ENSMUST00000228756	=	TSS35871;	0.235976509	0.236765844	0.000789334
XLOC_020921	11.04957522	2.969295469	-8.08027975	11.26671217	2.619011161	-8.64770101	TCONS_00062111	1	Exosc4	CUFF.25709.1	ENSMUST00000059045	j	TSS37458;	0.217136952	-0.350284308	-0.56742126
XLOC_026029	12.22388891	4.156050789	-8.067838118	12.46795871	4.482867504	-7.985091202	TCONS_00078469	1	Skiv2l	CUFF.31647.3	ENSMUST00000046022	j	TSS47111;	0.244069798	0.326816714	0.082746916
XLOC_029639	9.787870882	1.536564994	-8.251305887	9.756202298	3.135005311	-6.621196986	TCONS_00088853	1	Exosc1	CUFF.37513.1	ENSMUST00000075280	j	TSS53446;	-0.031668584	1.598440317	1.630108901
XLOC_030656	9.572714615	4.045964498	-5.526750117	9.650614452	1.975101561	-7.675512891	TCONS_00091611	1	Exosc2	ENSMUST00000038474	ENSMUST00000038474	=	TSS55149;	0.077899838	-2.070862937	-2.148762774
XLOC_035113	10.24223569	3.851112198	-6.391123493	10.35800303	3.615375633	-6.742627394	TCONS_00106754	1	Exosc9	CUFF.45022.2	ENSMUST00000029269	j	TSS63943;	0.115767336	-0.235736565	-0.3515039
XLOC_036748	9.582983786	2.786747877	-6.796235909	9.684959518	2.599111332	-7.085848187	TCONS_00112008	1	Exosc8	CUFF.45331.3	ENSMUST00000029316	j	TSS66974;	0.101975732	-0.187636545	-0.289612278
XLOC_038753	8.493375685	3.408035909	-5.085339776	9.616002446	2.83287586	-6.783126587	TCONS_00117440	1	Zcchc7	ENSMUST00000154121	ENSMUST00000154121	=	TSS70343;	1.122626761	-0.575160049	-1.69778681
XLOC_039846	11.40652376	4.892603159	-6.513920601	11.57411869	3.89622398	-7.67789471	TCONS_00121253	1	Exosc10	CUFF.52324.4	ENSMUST00000097781	j	TSS72593;	0.167594929	-0.996379179	-1.163974108
XLOC_040296	9.598333869	2.113653097	-7.484680772	9.792177082	2.409650511	-7.382526572	TCONS_00122887	1	Exosc3	ENSMUST00000030003	ENSMUST00000030003	=	TSS73474;	0.193843214	0.295997414	0.1021542
XLOC_045054	10.21635107	2.885974614	-7.33037646	10.46709005	2.740242773	-7.726847272	TCONS_00138676	1	Zcchc8	CUFF.56261.1	ENSMUST00000199875	=	TSS82799;	0.250738971	-0.145731841	-0.396470812
XLOC_045235	11.2925308	5.037741886	-6.254788912	11.32289746	4.914145825	-6.408751632	TCONS_00139499	1	Srrt	CUFF.56836.5	ENSMUST00000040873	j	TSS83221;	0.03036666	-0.123596061	-0.15396272
XLOC_046500	14.37108685	3.985590598	-10.38549625	14.49103834	3.722304464	-10.76873388	TCONS_00142668	1	Mpp6	ENSMUST00000166318	ENSMUST00000166318	=	TSS85239;	0.119951495	-0.263286134	-0.383237629
XLOC_050256	10.85135034	3.01773384	-7.833616497	10.59646252	1.94404149	-8.65242103	TCONS_00154031	1	Exosc5	ENSMUST00000079634	ENSMUST00000079634	=	TSS91946;	-0.254887817	-1.07369235	-0.818804533
XLOC_056022	10.49824843	4.430482987	-6.067765443	10.45344399	4.264309202	-6.189134786	TCONS_00172890	1	Papd5	ENSMUST00000066748	ENSMUST00000066748	=	TSS102857;	-0.044804442	-0.166173785	-0.121369343
XLOC_057500	10.04337975	2.42825422	-7.615125534	9.738807518	2.468194187	-7.270613331	TCONS_00178125	1	Mphosph6	ENSMUST00000213070	ENSMUST00000213070	=	TSS105747;	-0.304572236	0.039939967	0.344512203
XLOC_059506	9.868520437	1.968233358	-7.900287079	10.13312118	3.025522814	-7.107598369	TCONS_00184593	1	Exosc7	ENSMUST00000026891	ENSMUST00000026891	=	TSS109633;	0.264600745	1.057289456	0.79268871
XLOC_060125	11.48074325	3.735959465	-7.744783782	11.62952475	4.368884749	-7.260639997	TCONS_00186827	1	Wdr61	ENSMUST00000118771	ENSMUST00000118771	=	TSS110876;	0.1487815	0.632925285	0.484143785
